# Supplementary material for: Catalyst and solvent-free alkylation of quinoline N-oxides with olefins: A direct access to quinoline-substituted α-hydroxy carboxylic derivatives
Source: Royal Society of Chemistry journal article supplement (doi:10.1039/c5ob02600h), 2016-01-01

## **Catalyst and Solvent-Free alkylation of Quinoline *N*-oxide with olefins: Direct Access to Quinoline Substituted $\alpha$ -Hydroxy Carboxylic Derivatives**

Rakesh Kumar,<sup>ab</sup> Inder Kumar,<sup>ab</sup> Ritika Sharma<sup>ab</sup> and Upendra Sharma<sup>\*ab</sup>

<sup>†</sup>Natural Product Chemistry and Process Development Division, CSIR- IHBT, Palampur, India

<sup>‡</sup>Academy of Scientific and Innovative Research, CSIR-IHBT, Palampur, India

### *Supporting Information*

#### *Table of Contents*

| <b>Entry</b> | <b>Title</b>                                                               | <b>Page no.</b> |
|--------------|----------------------------------------------------------------------------|-----------------|
| <b>1</b>     | <b>Quinoline <i>N</i>-oxide reaction with acrylates</b>                    | <b>2-3</b>      |
| <b>2</b>     | <b>Spectral data for quinoline <i>N</i>-oxides reaction with acrylates</b> | <b>4-28</b>     |

**1 Spectral data for quinoline *N*-oxides reaction with acrylate**  
***ethyl 2-hydroxy-3-(quinolin-2-yl)propanoate (Table 2, entry 3a)***

**<sup>1</sup>H NMR (600 MHz, CDCl<sub>3</sub>)**

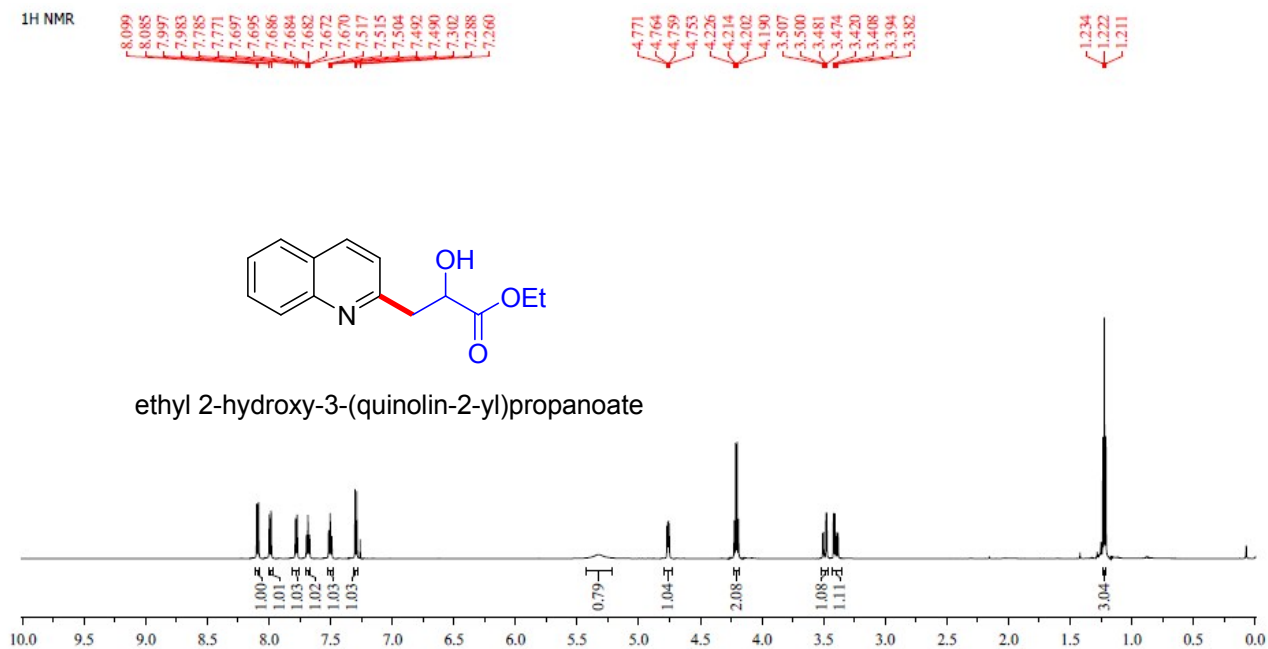

**<sup>13</sup>C NMR (150 MHz, CDCl<sub>3</sub>)**

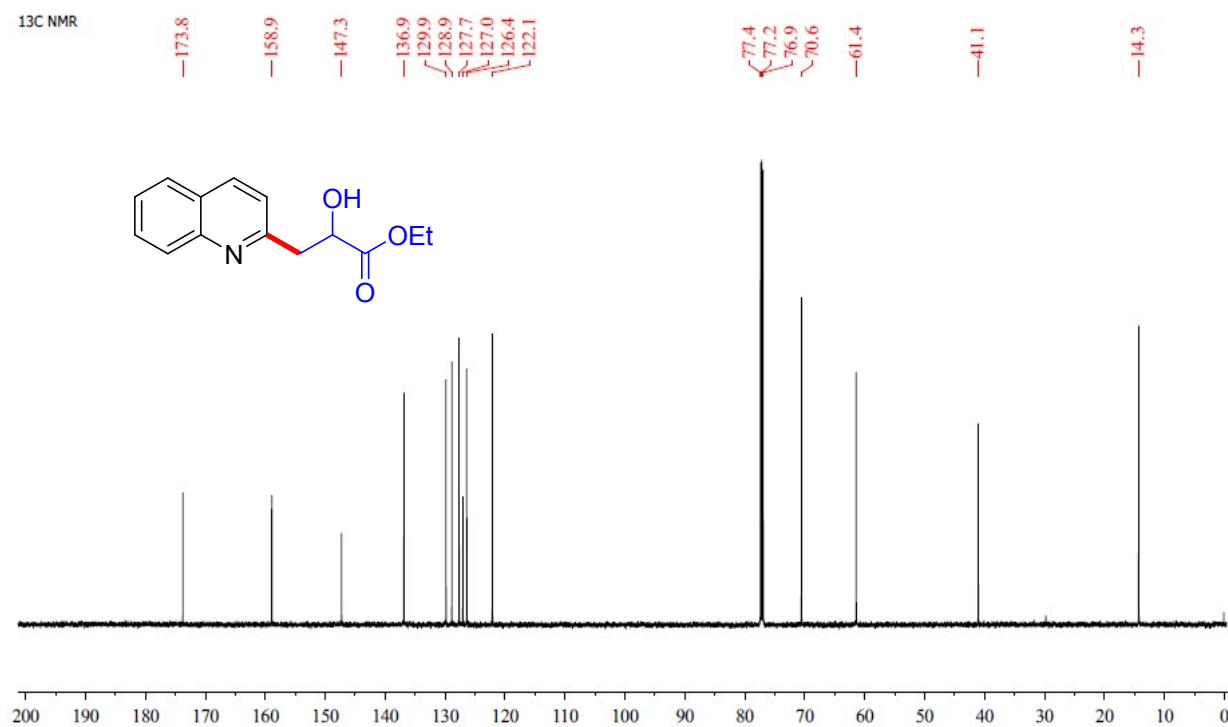

# Dept

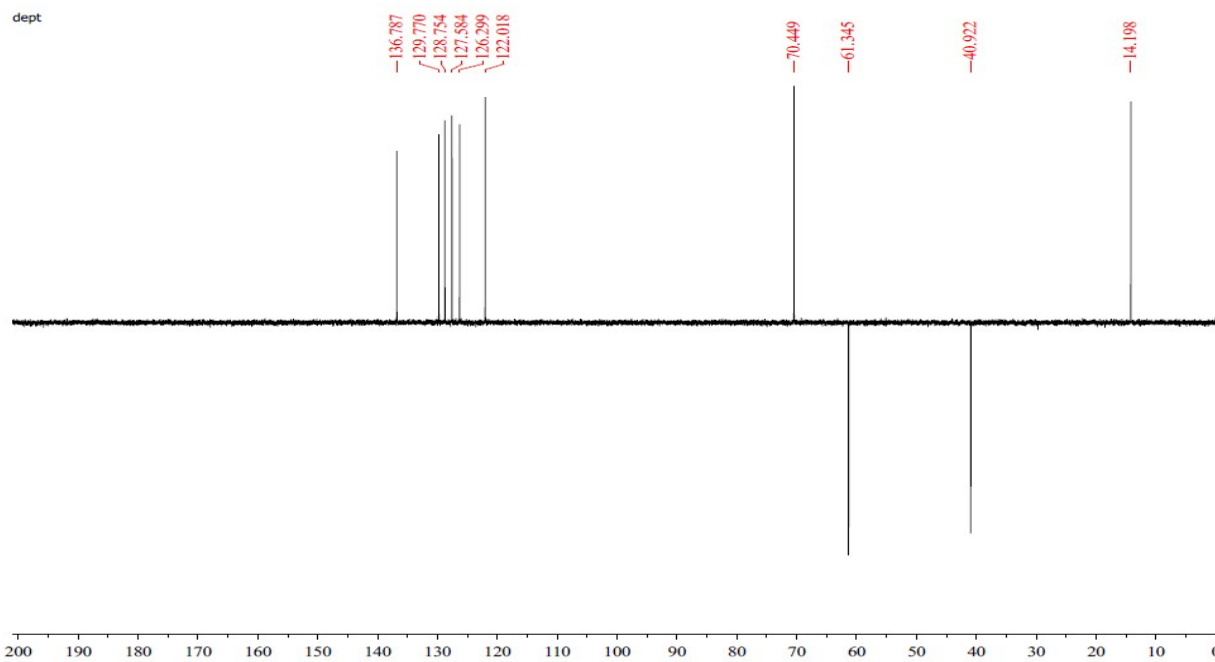

# HMQC

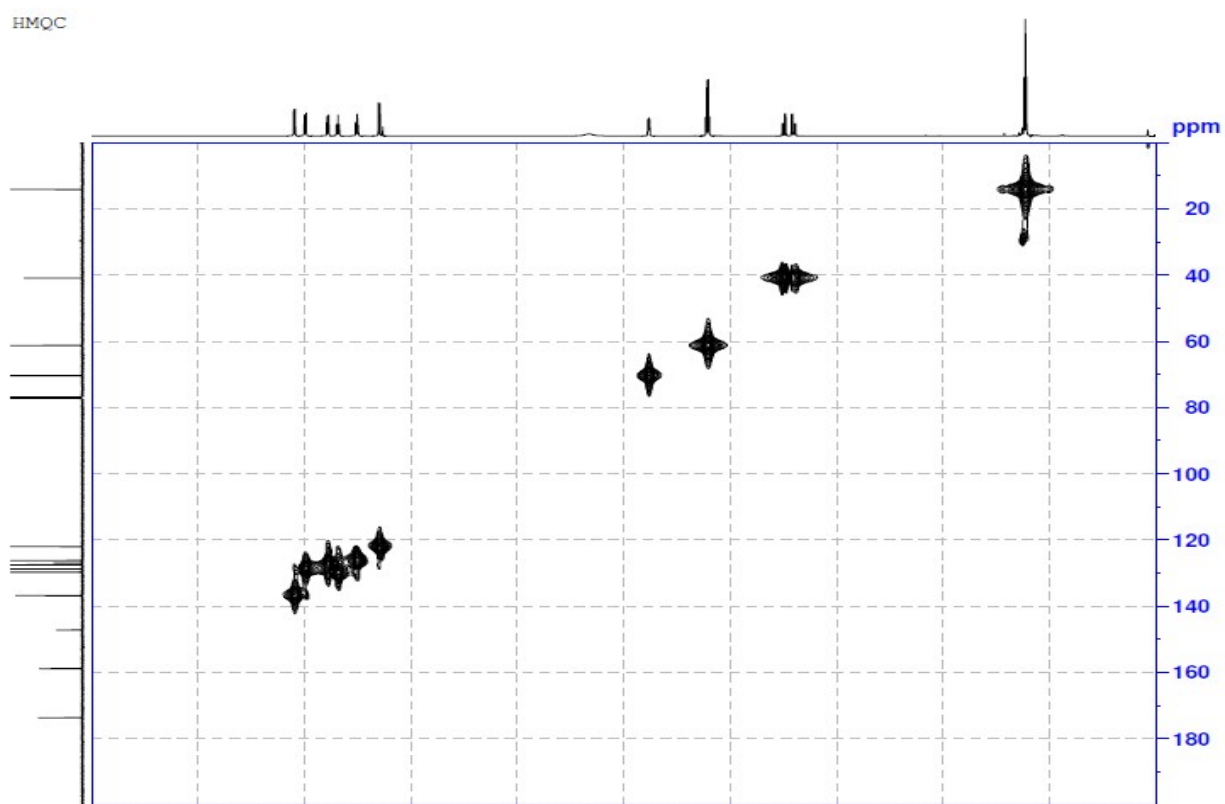

# HMBC

HMBCGP

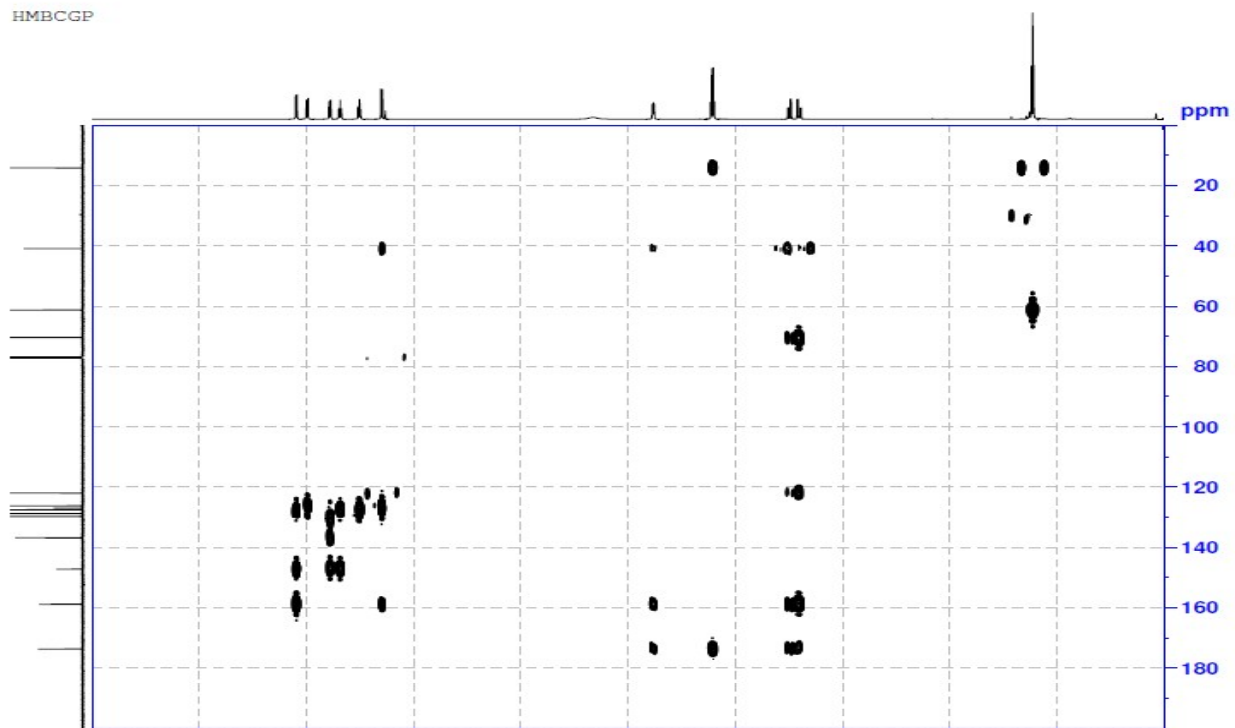

# COSY

COSY

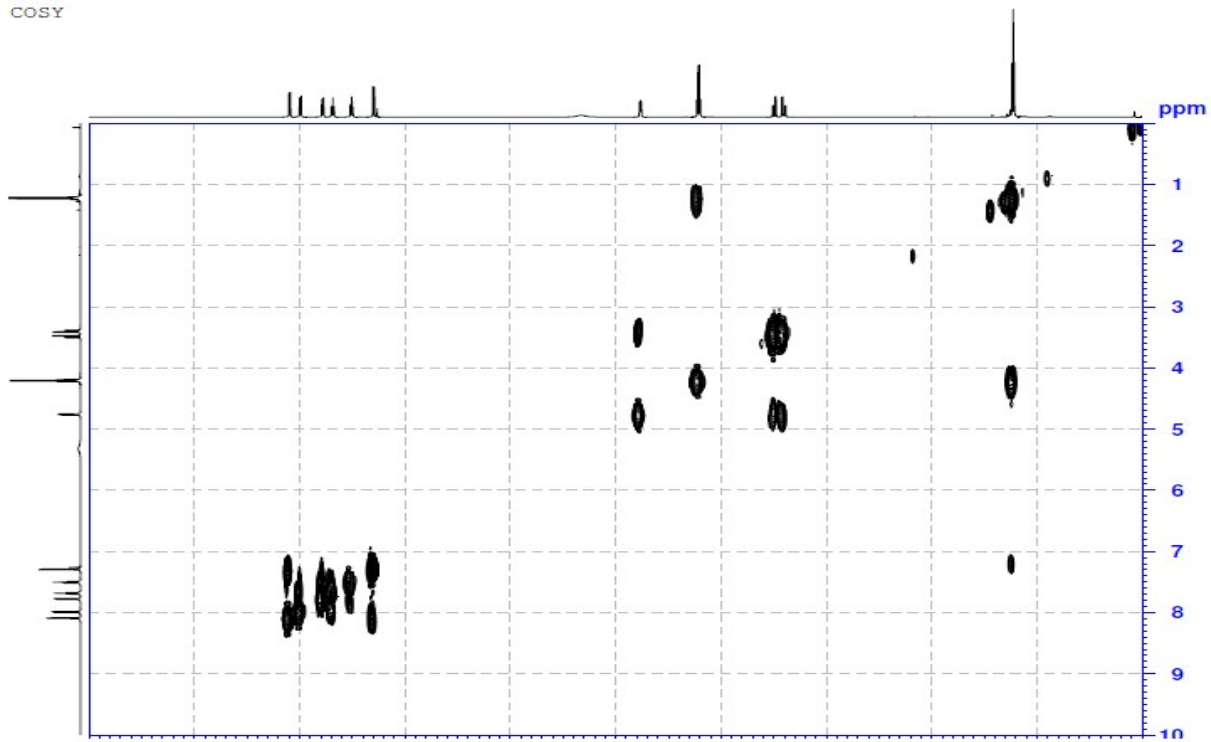

***methyl 2-hydroxy-3-(quinolin-2-yl)propanoate (Table 2, entry 3b)***

**<sup>1</sup>H NMR (600 MHz, CDCl<sub>3</sub>)**

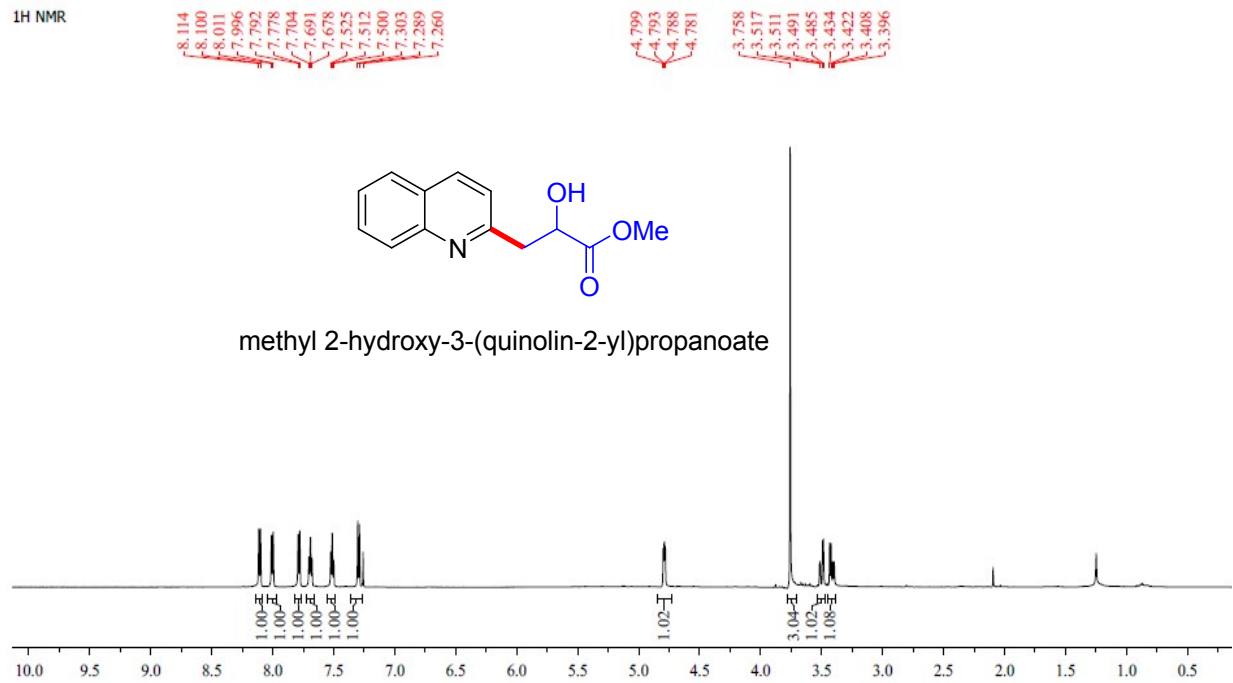

**<sup>13</sup>C NMR (150 MHz, CDCl<sub>3</sub>)**

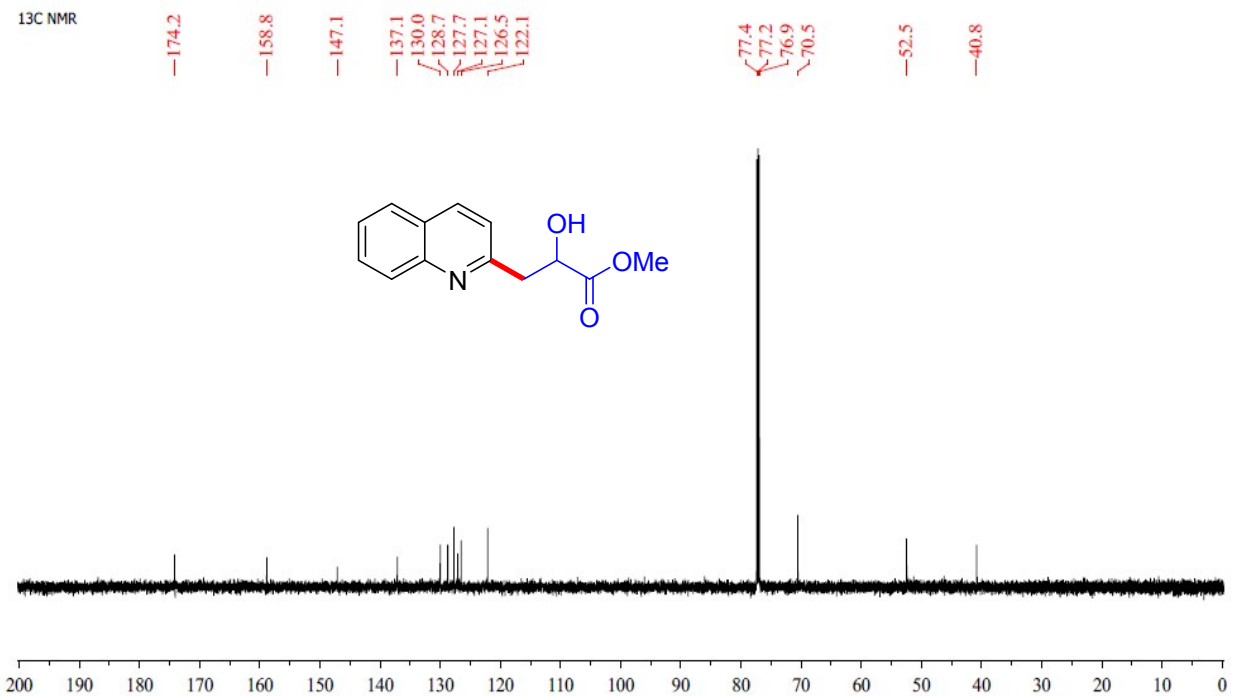

*butyl 2-hydroxy-3-(quinolin-2-yl)propanoate* (Table 2, entry 3c)

$^1\text{H NMR}$  (600 MHz,  $\text{CDCl}_3$ )

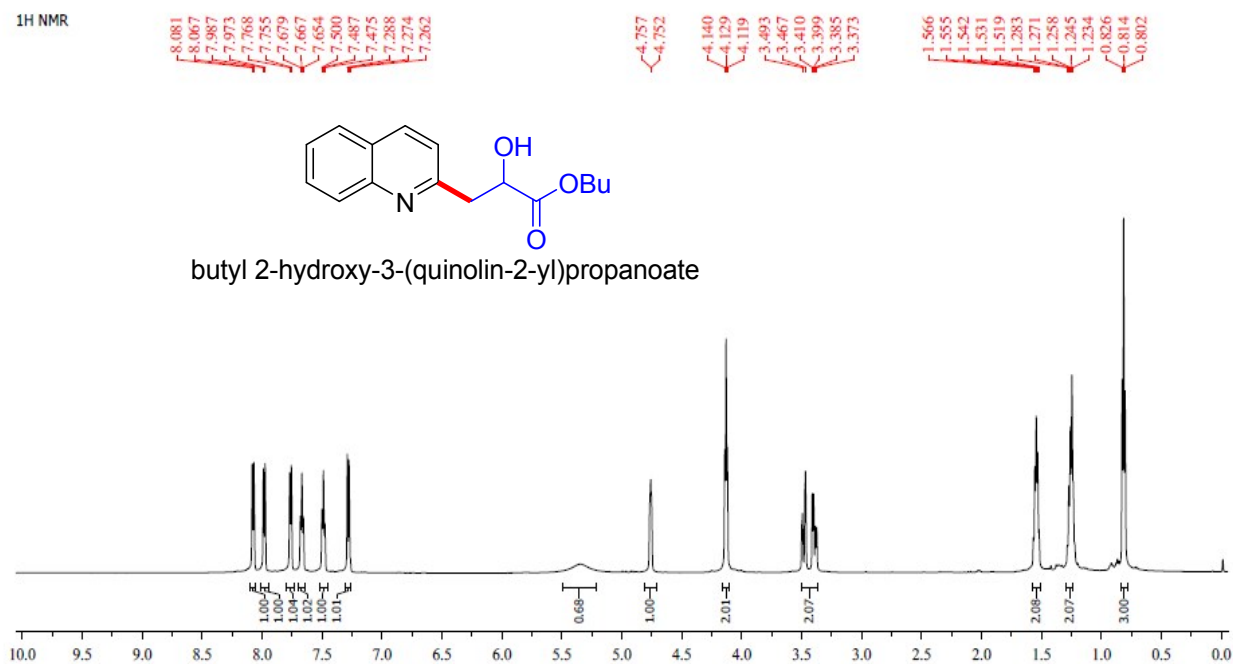

$^{13}\text{C NMR}$  (150 MHz,  $\text{CDCl}_3$ )

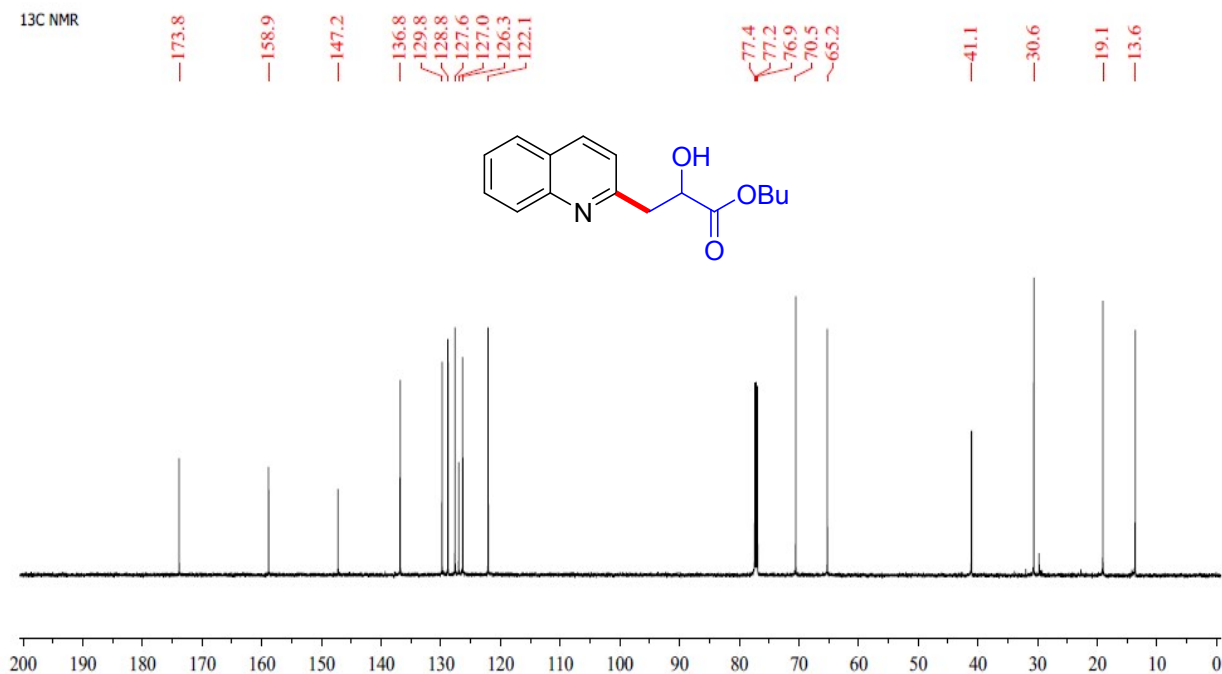

***tert*-butyl 2-hydroxy-3-(quinolin-2-yl)propanoate (Table 2, entry 3d)**

**<sup>1</sup>H NMR (300 MHz, CDCl<sub>3</sub>)**

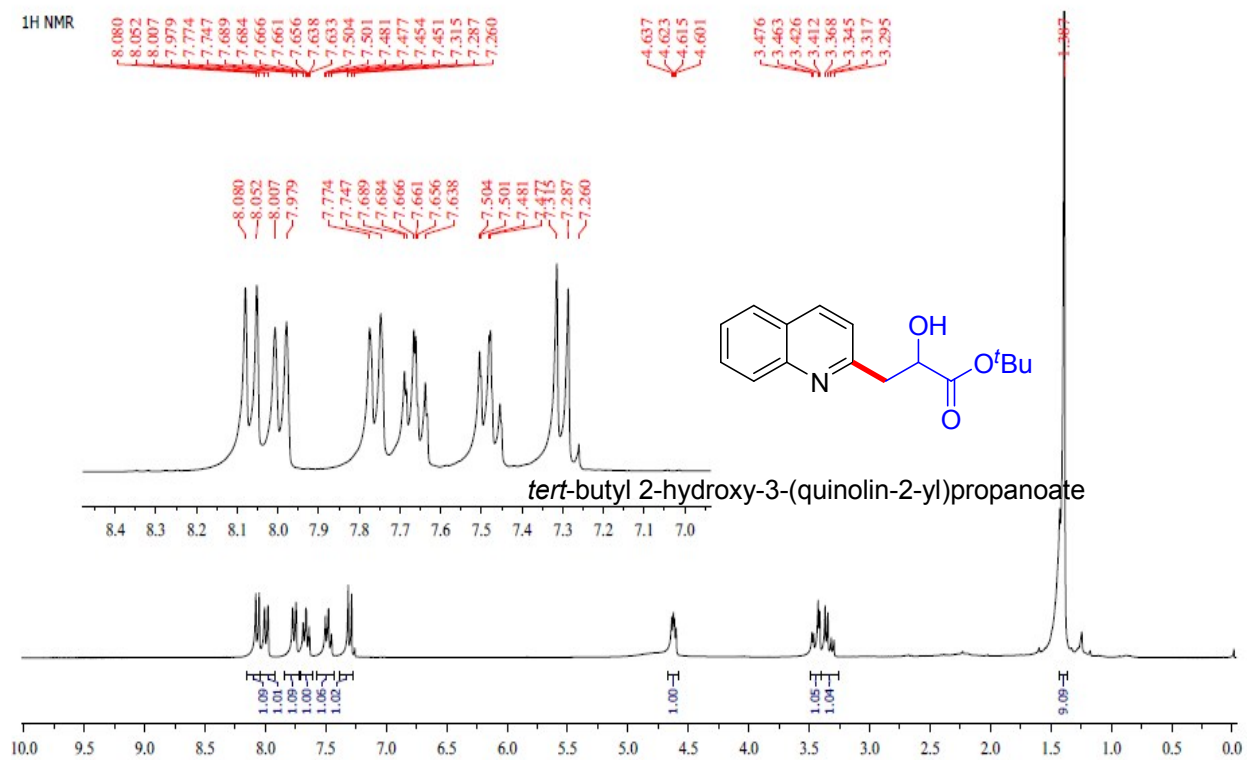

**<sup>13</sup>C NMR (75 MHz, CDCl<sub>3</sub>)**

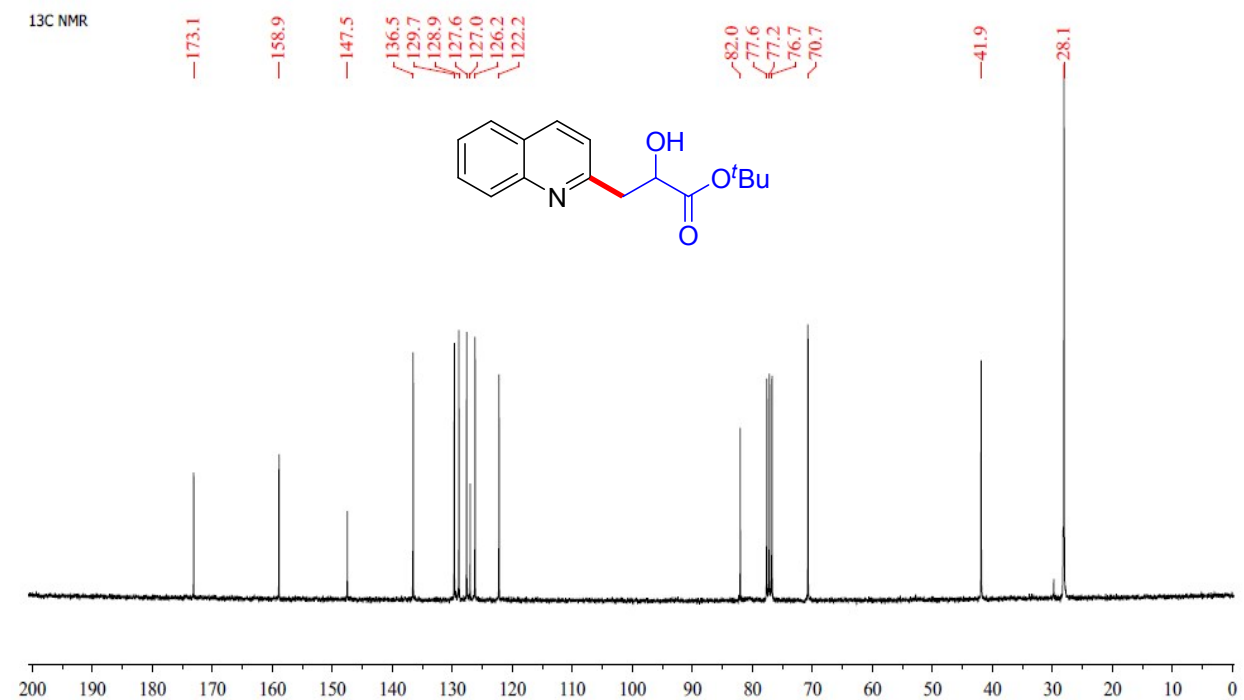

**benzyl 2-hydroxy-3-(quinolin-2-yl)propanoate (Table 2 , entry 3e)**

**<sup>1</sup>H NMR (600 MHz, CDCl<sub>3</sub>)**

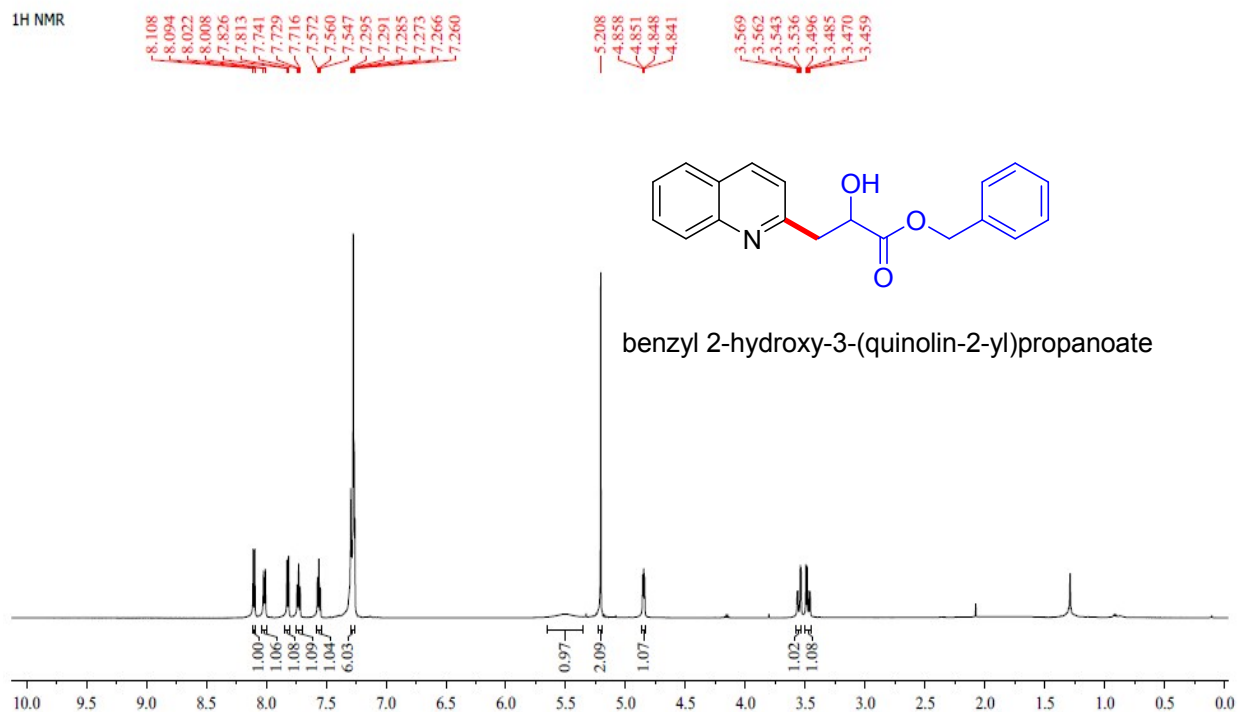

**<sup>13</sup>C NMR (75 MHz, CDCl<sub>3</sub>)**

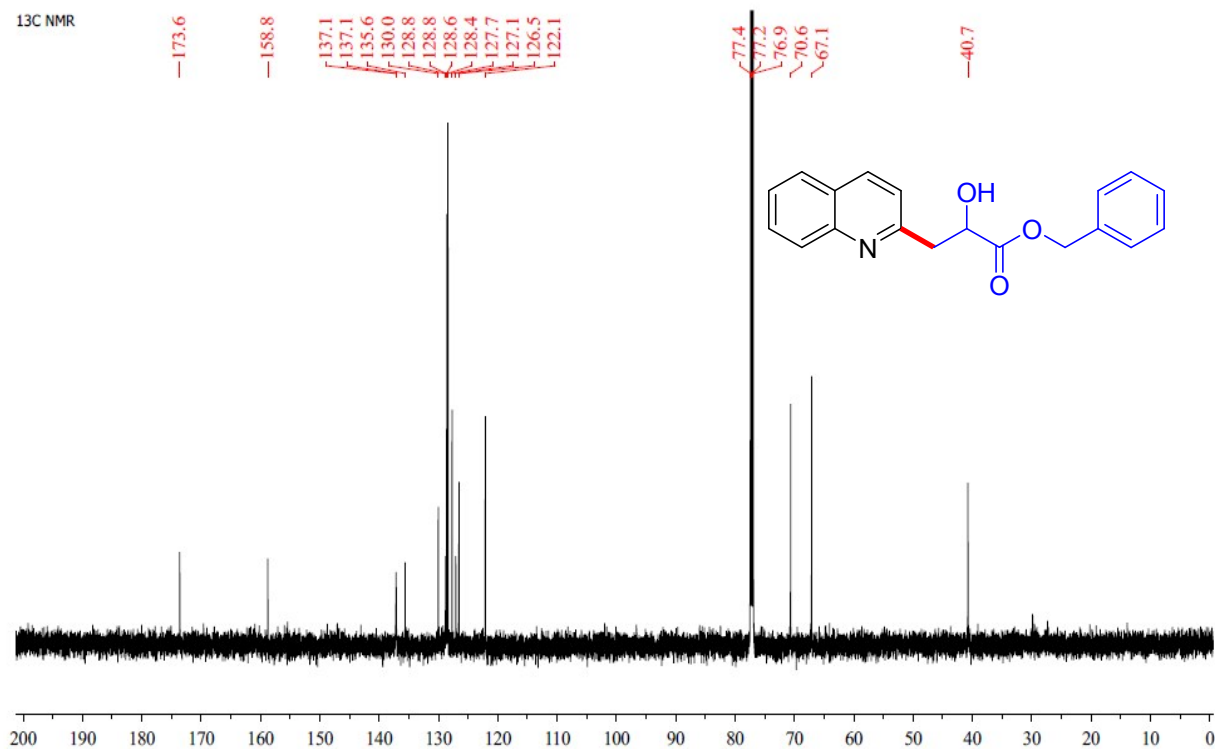



**3,3,4,4,5,5,6,6,7,7,8,8,9,9,10,10,10-heptafluorodecyl 2-hydroxy-3-(quinolin-2-yl)propanoate (Table 2, entry 3f)**

**<sup>1</sup>H NMR (600 MHz, CDCl<sub>3</sub>)**

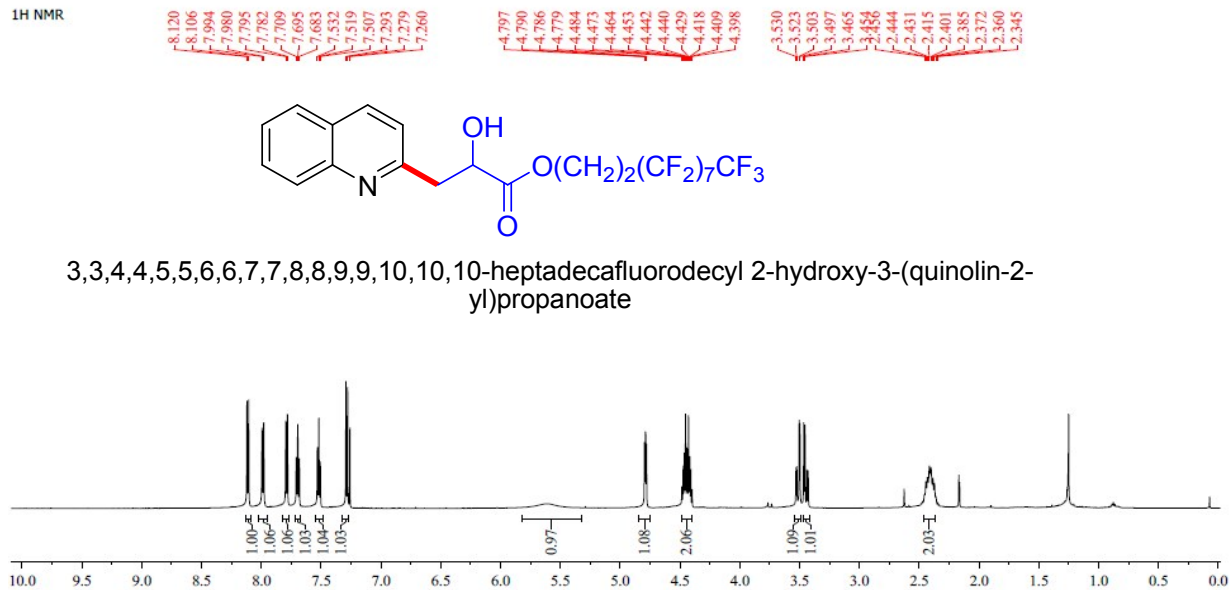

**<sup>13</sup>C NMR (150 MHz, CDCl<sub>3</sub>)**

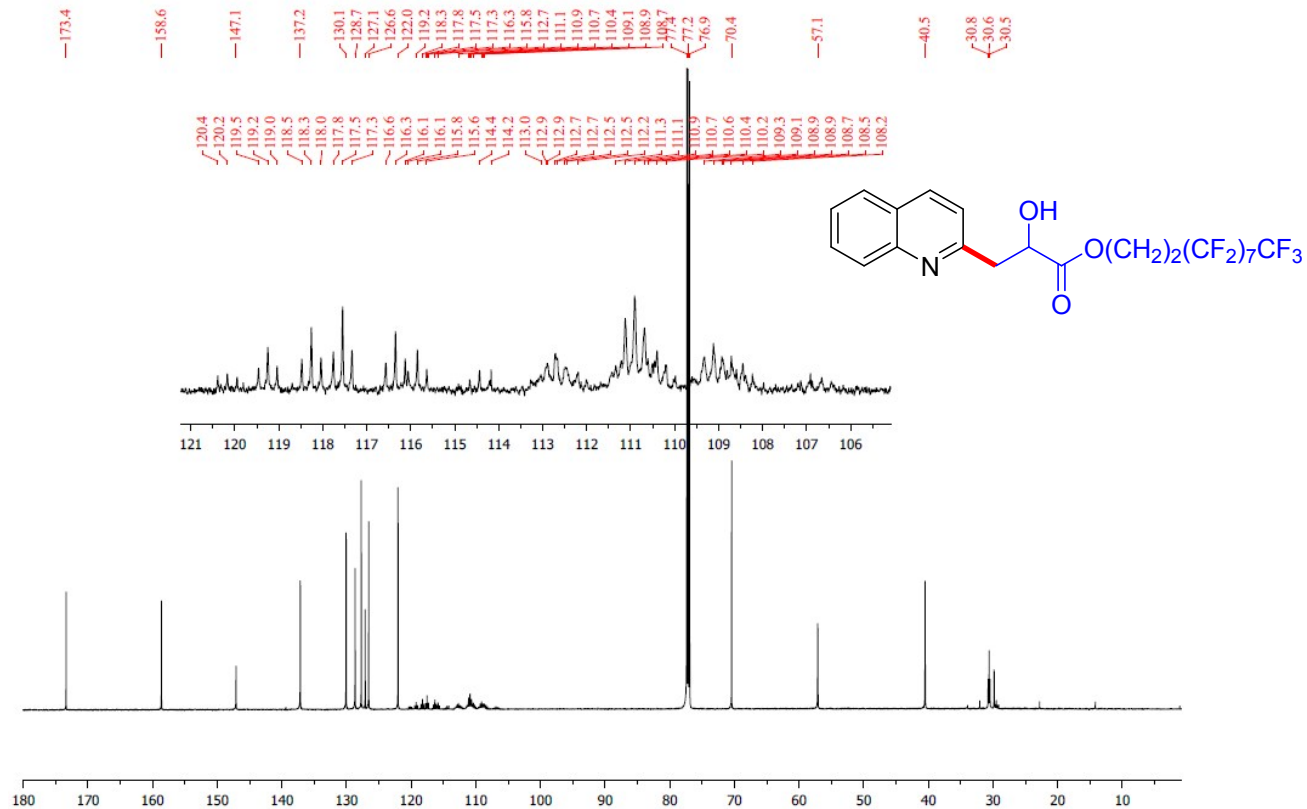

*N*-tert-butyl-2-hydroxy-3-(quinolin-2-yl)propanamide (Table 2, entry 3g)

<sup>1</sup>H NMR (600 MHz, CDCl<sub>3</sub>)

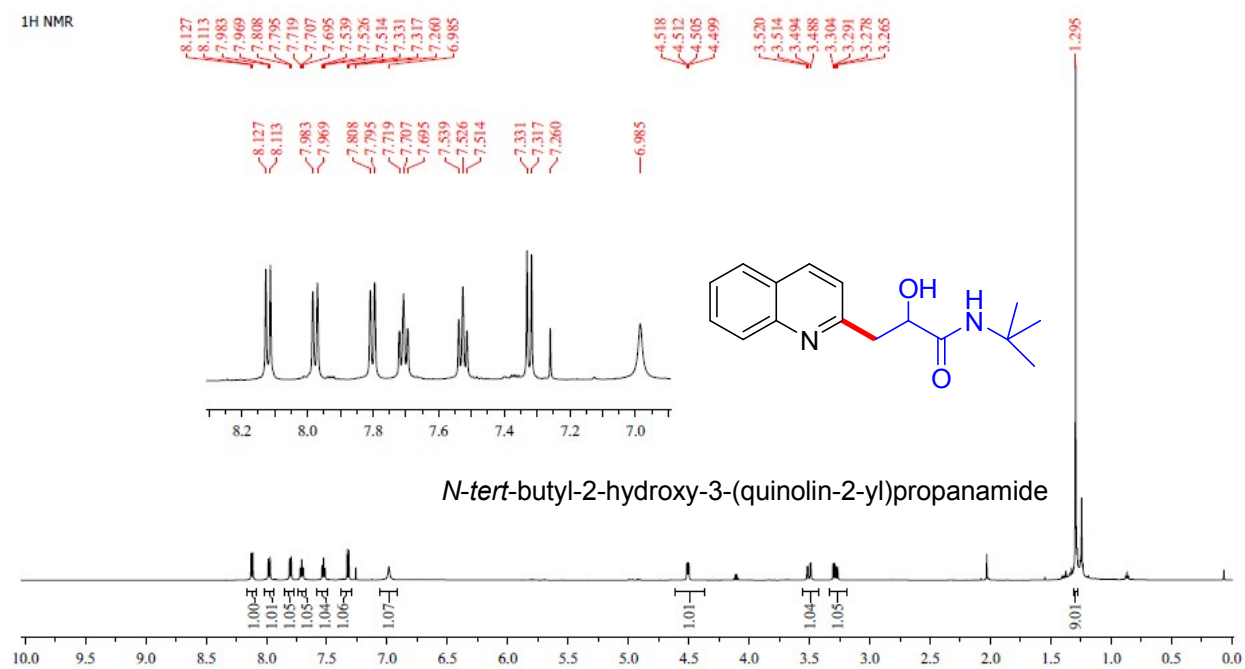

<sup>13</sup>C NMR (150 MHz, CDCl<sub>3</sub>)

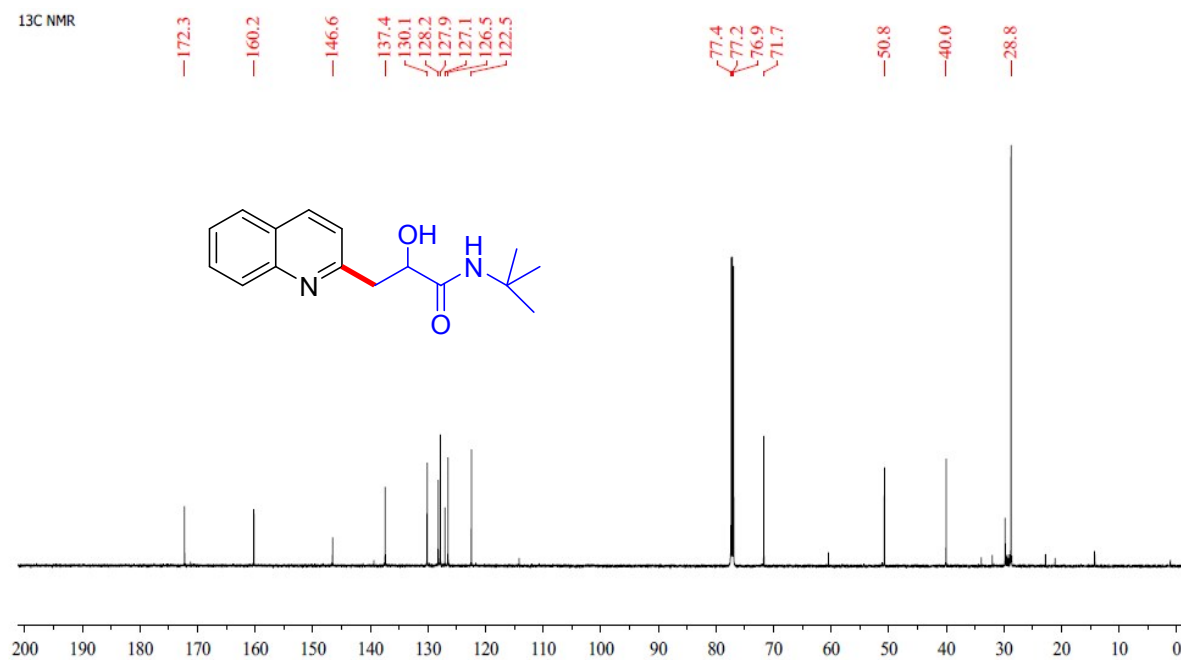

**butyl 2-hydroxy-2-(quinolin-2-yl)methylpropanoate (Table 2, entry 3h)**

**<sup>1</sup>H NMR (600 MHz, CDCl<sub>3</sub>)**

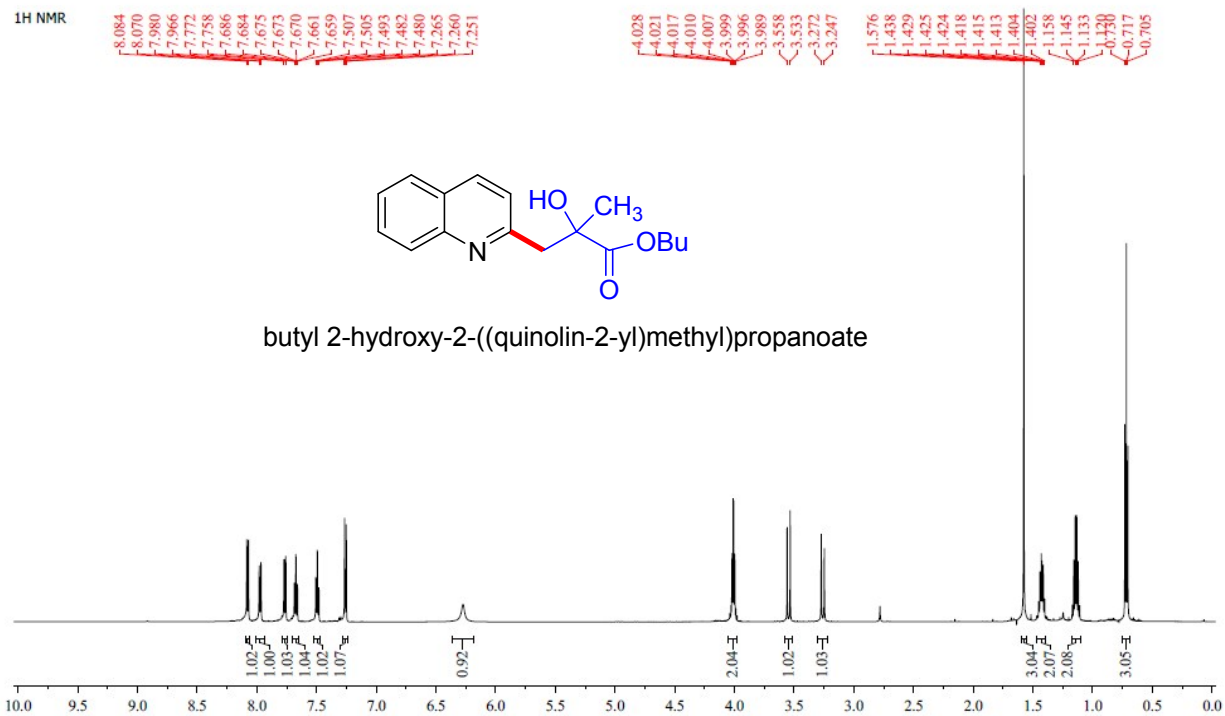

**<sup>13</sup>C NMR (150 MHz, CDCl<sub>3</sub>)**

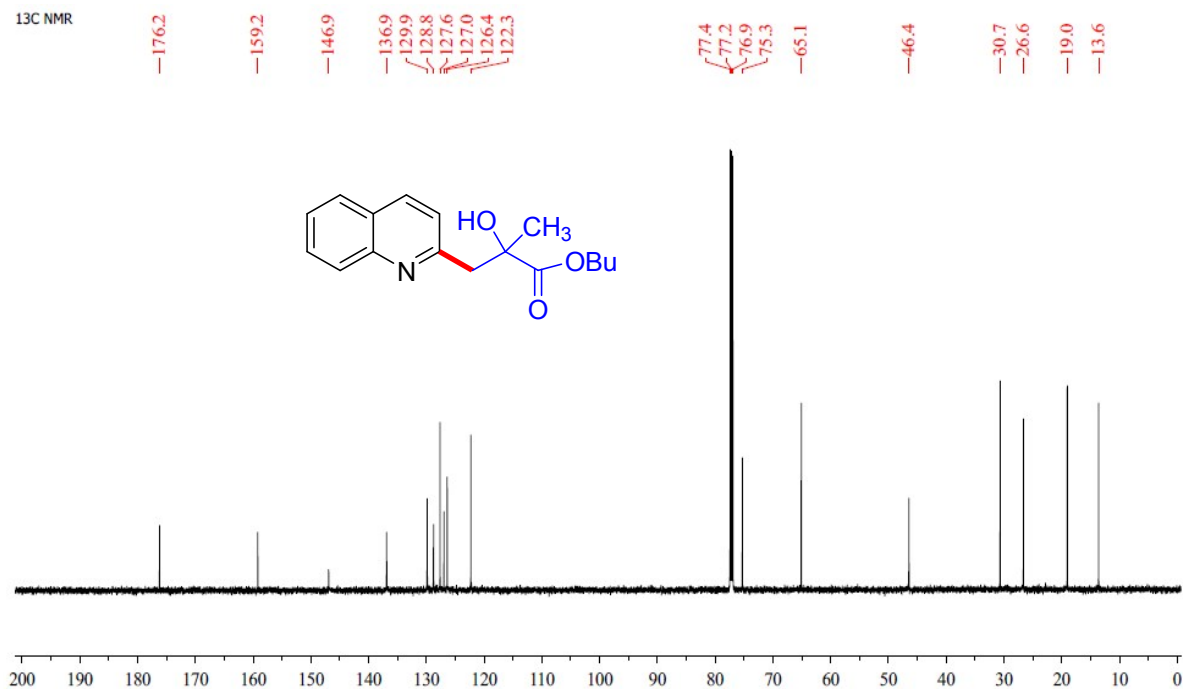

*butyl 2-hydroxy-3-(3-methylquinolin-2-yl)propanoate* ( Table 2, entry 3i)

$^1\text{H}$  NMR (600 MHz,  $\text{CDCl}_3$ )

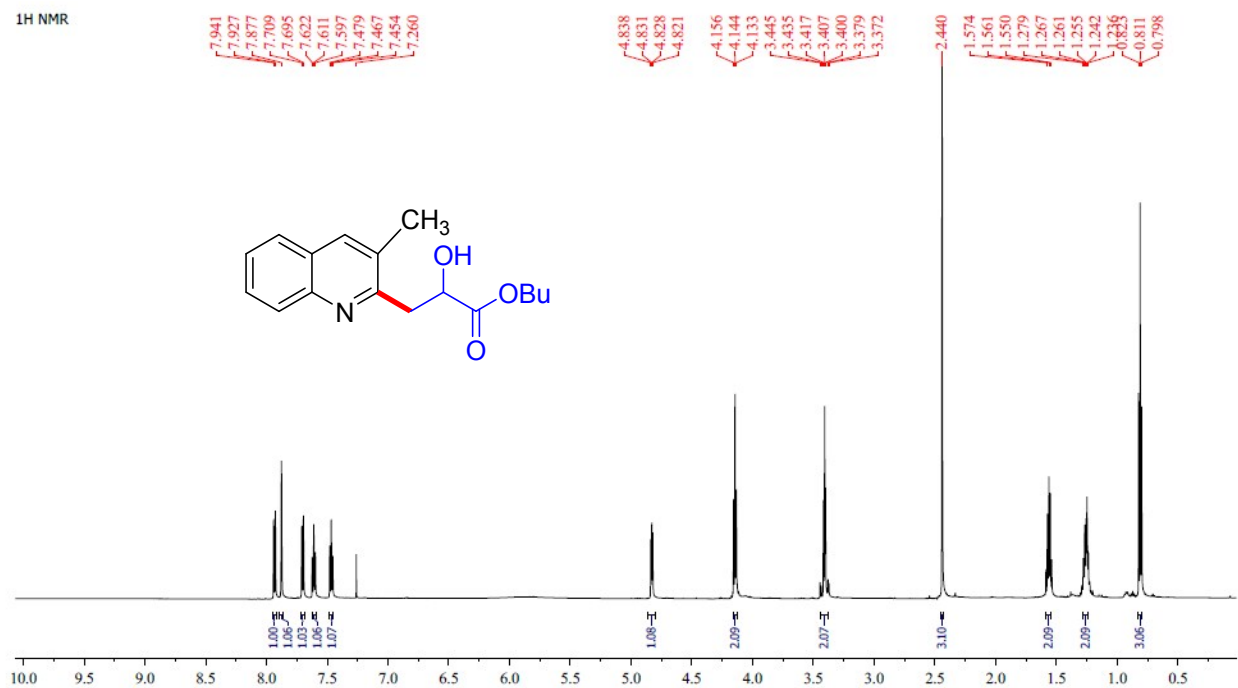

$^{13}\text{C}$  NMR (150 MHz,  $\text{CDCl}_3$ )

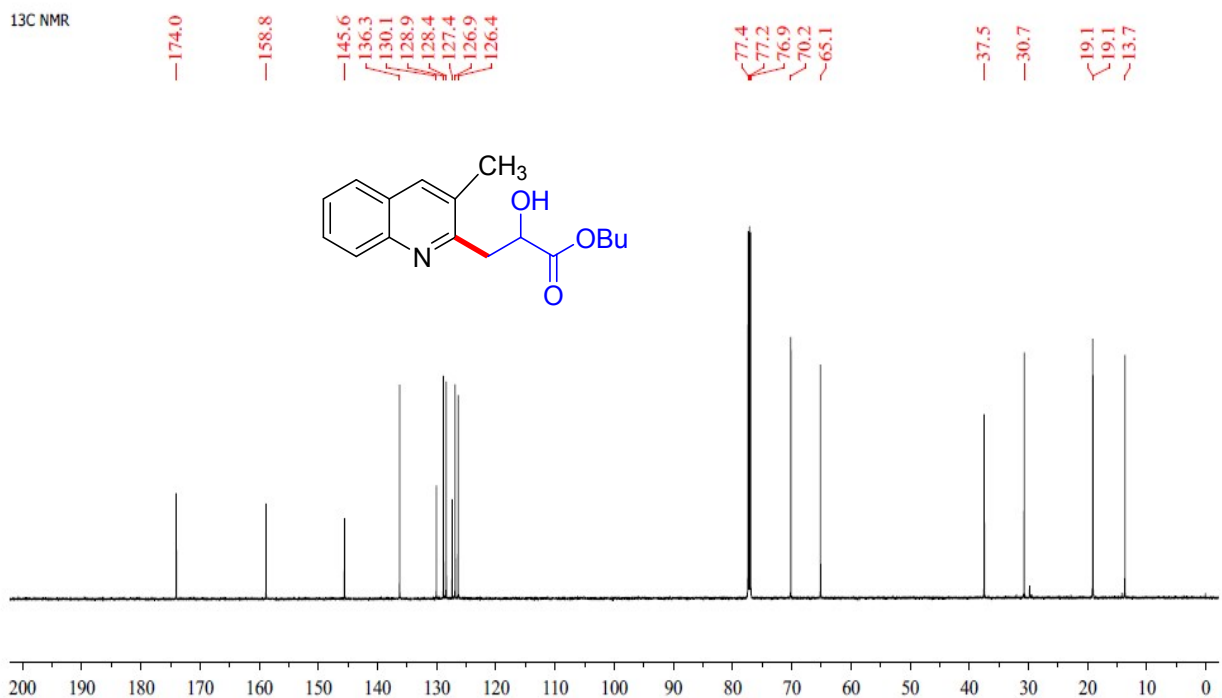

**butyl 2-hydroxy-3-(4-methylquinolin-2-yl)propanoate (Table 2, entry 3j)**

**<sup>1</sup>H NMR (300 MHz, CDCl<sub>3</sub>)**

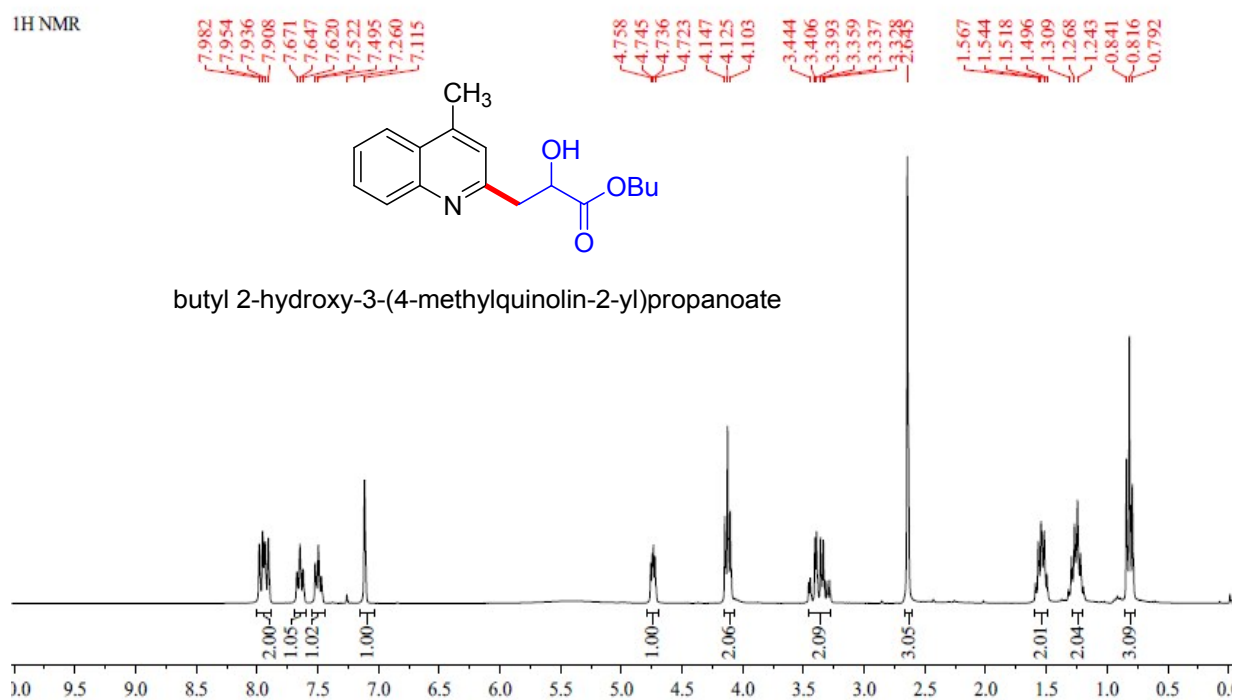

**<sup>13</sup>C NMR (75 MHz, CDCl<sub>3</sub>)**

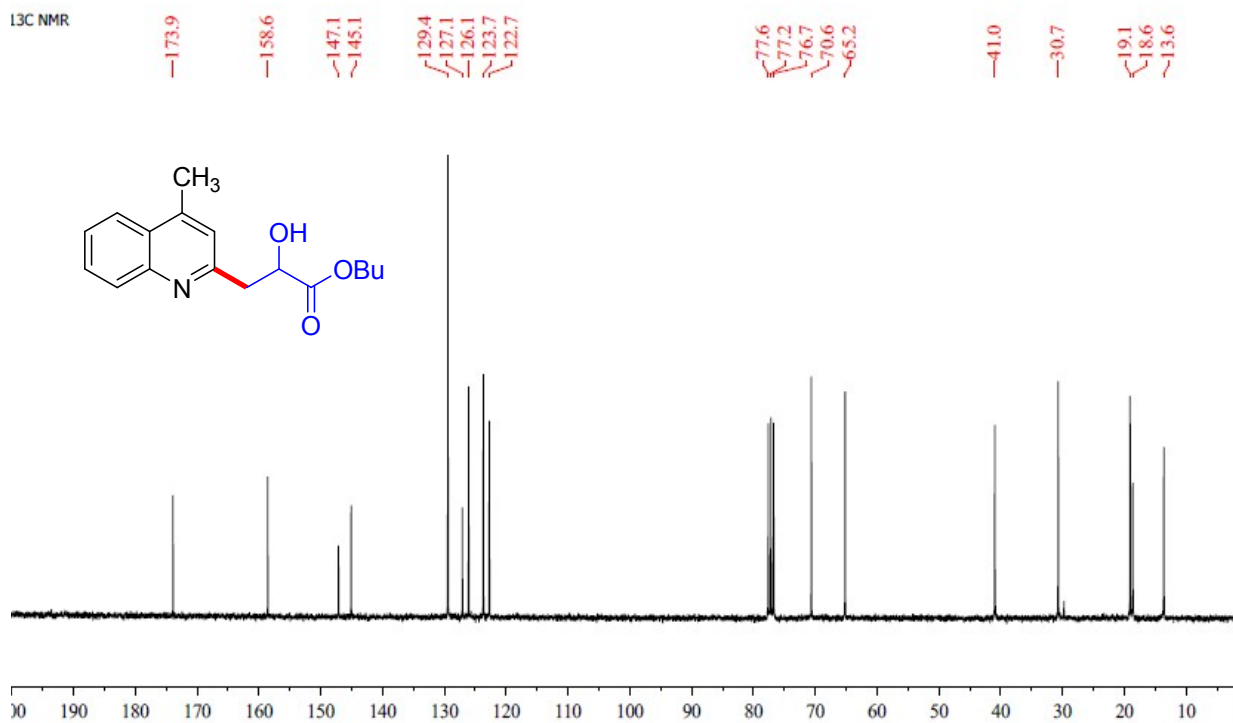

*butyl 2-hydroxy-3-(6-methylquinolin-2-yl)propanoate (Table 2, entry 3k)*

<sup>1</sup>H NMR (600 MHz, CDCl<sub>3</sub>)

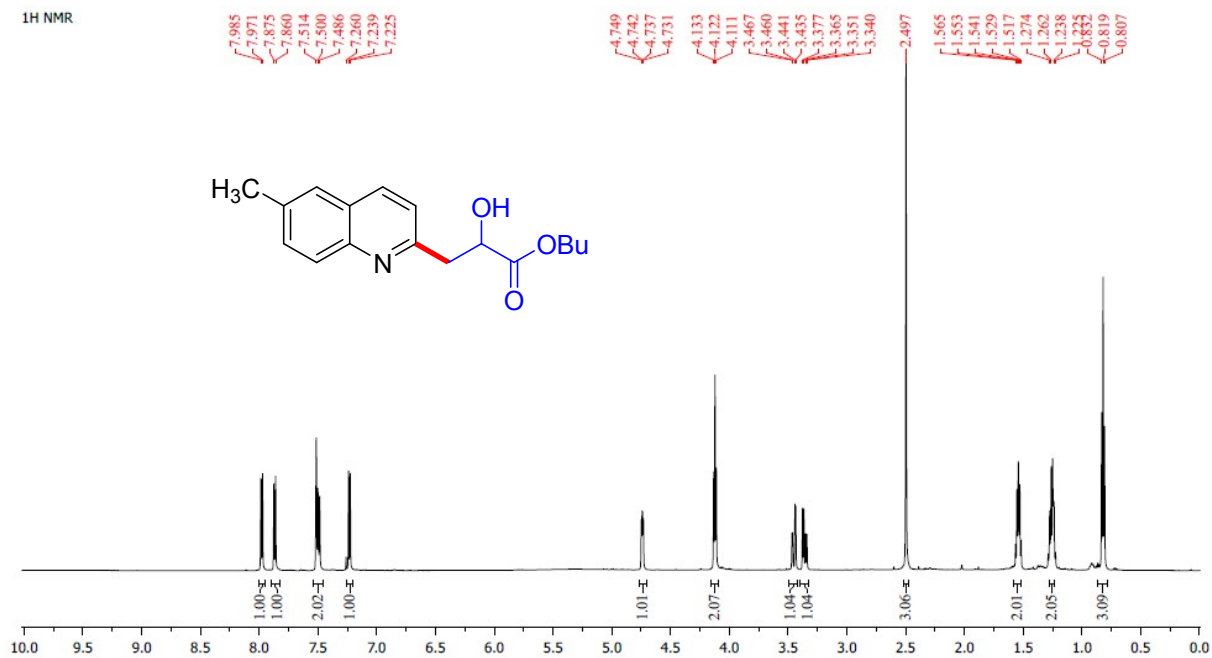

<sup>13</sup>C NMR (150 MHz, CDCl<sub>3</sub>)

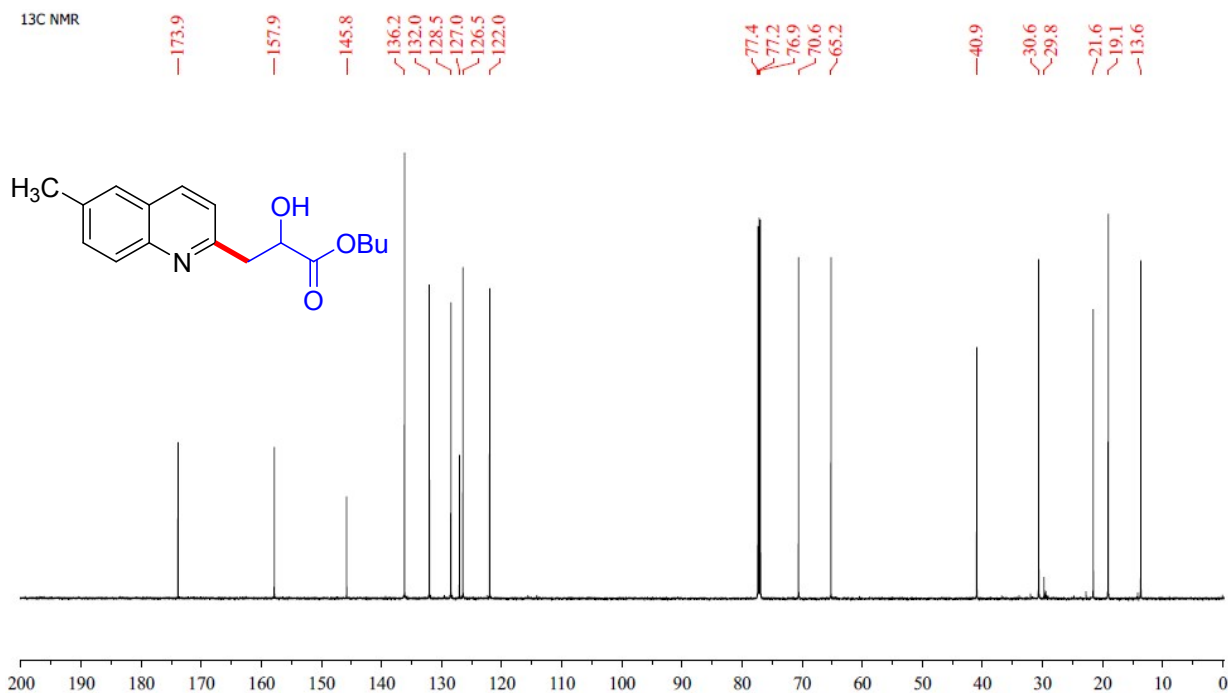

**butyl 2-hydroxy-3-(3-(1,3-dioxisoindolin-2-yl)quinolin-2-yl)propanoate (Table 2, entry 3m)**

<sup>1</sup>H NMR (600 MHz, CDCl<sub>3</sub>)

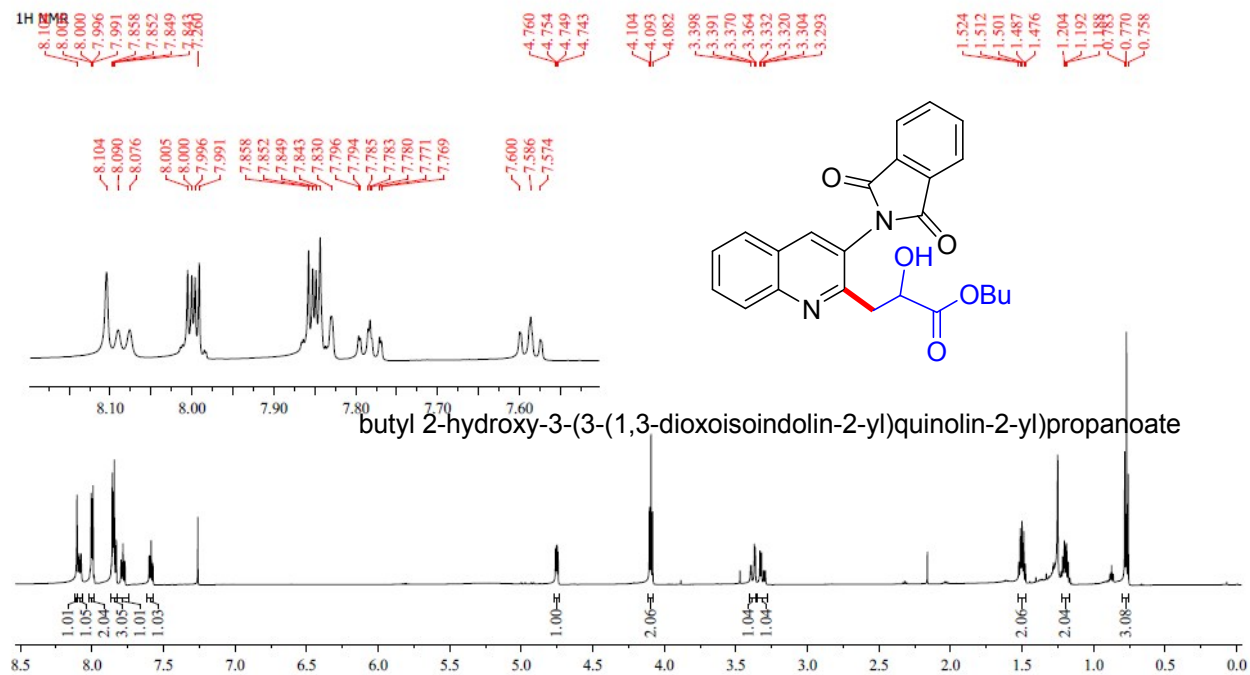

<sup>13</sup>C NMR (150 MHz, CDCl<sub>3</sub>)

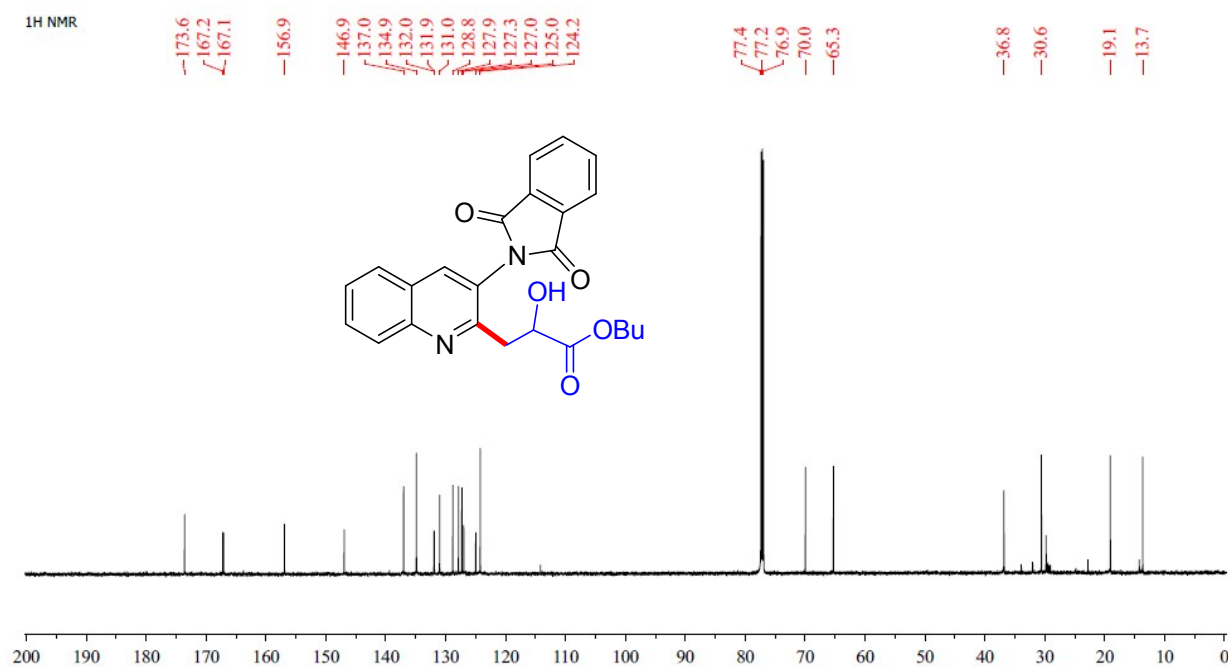

**butyl 3-(3-(1,3-dioxolan-2-yl)quinolin-2-yl)-2-hydroxypropanoate (Table 2, entry 3n)**

<sup>1</sup>H NMR (600 MHz, CDCl<sub>3</sub>)

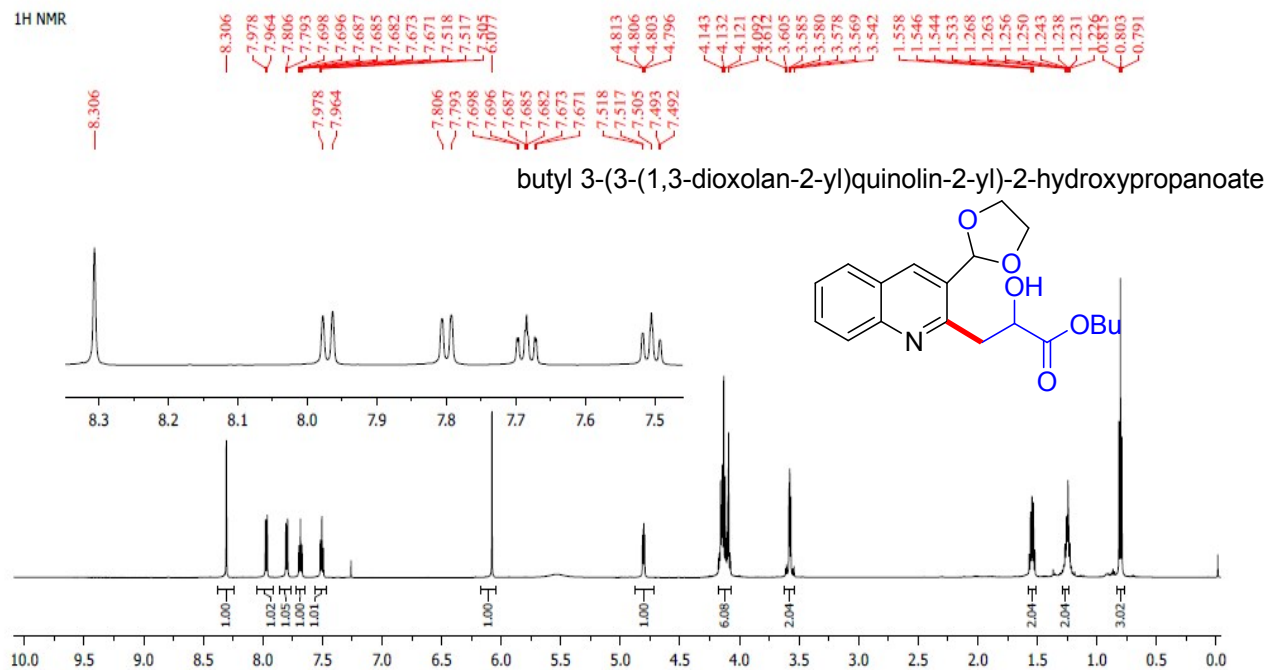

<sup>13</sup>C NMR (150 MHz, CDCl<sub>3</sub>)

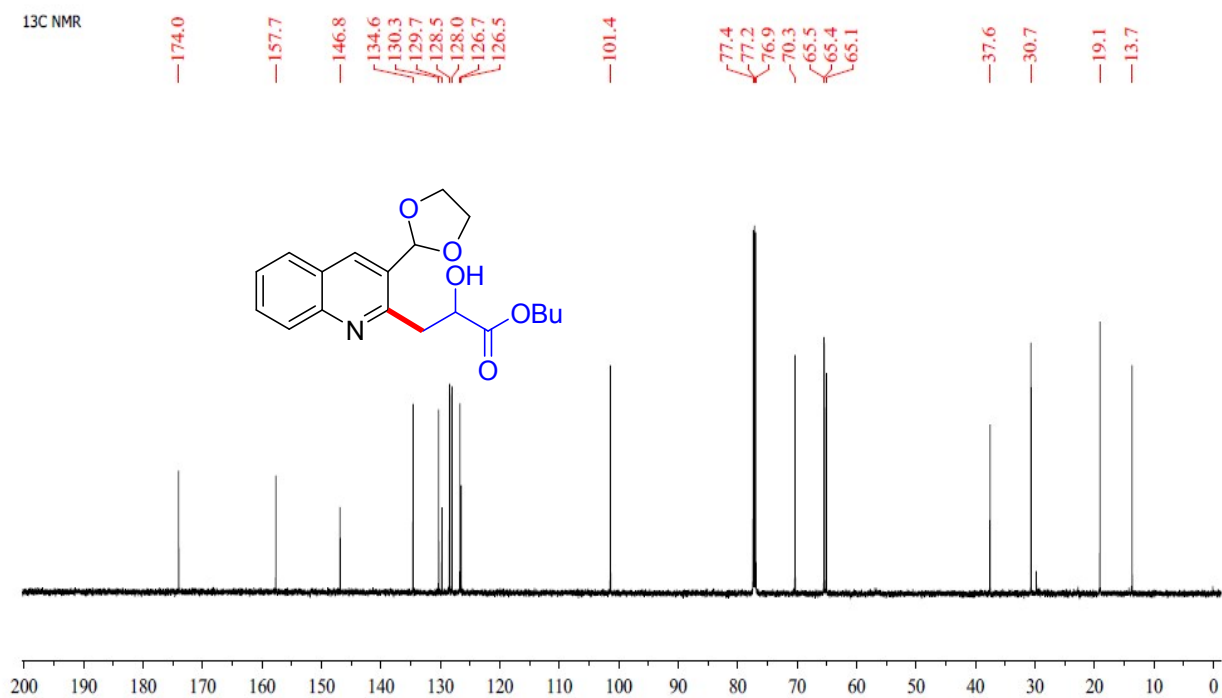



*butyl 3-(4-(acetoxymethyl)quinolin-2-yl)-2-hydroxypropanoate (Table 2, entry 3p)*

$^1\text{H NMR}$  (300 MHz,  $\text{CDCl}_3$ )

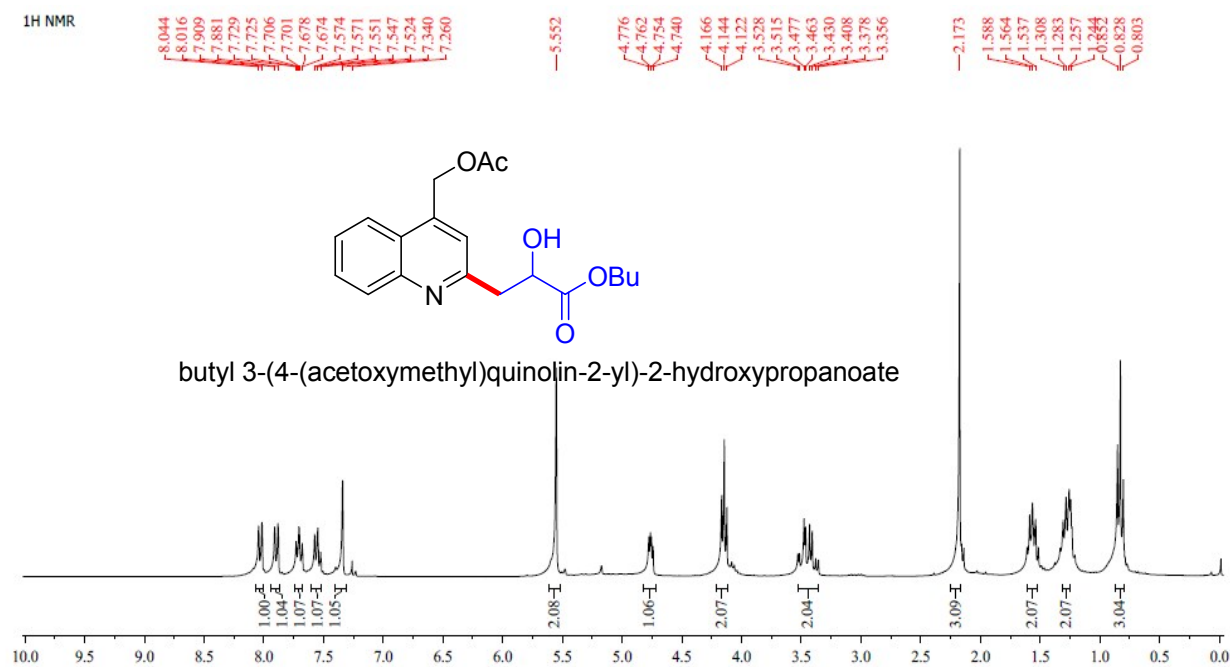

$^{13}\text{C NMR}$  (75 MHz,  $\text{CDCl}_3$ )

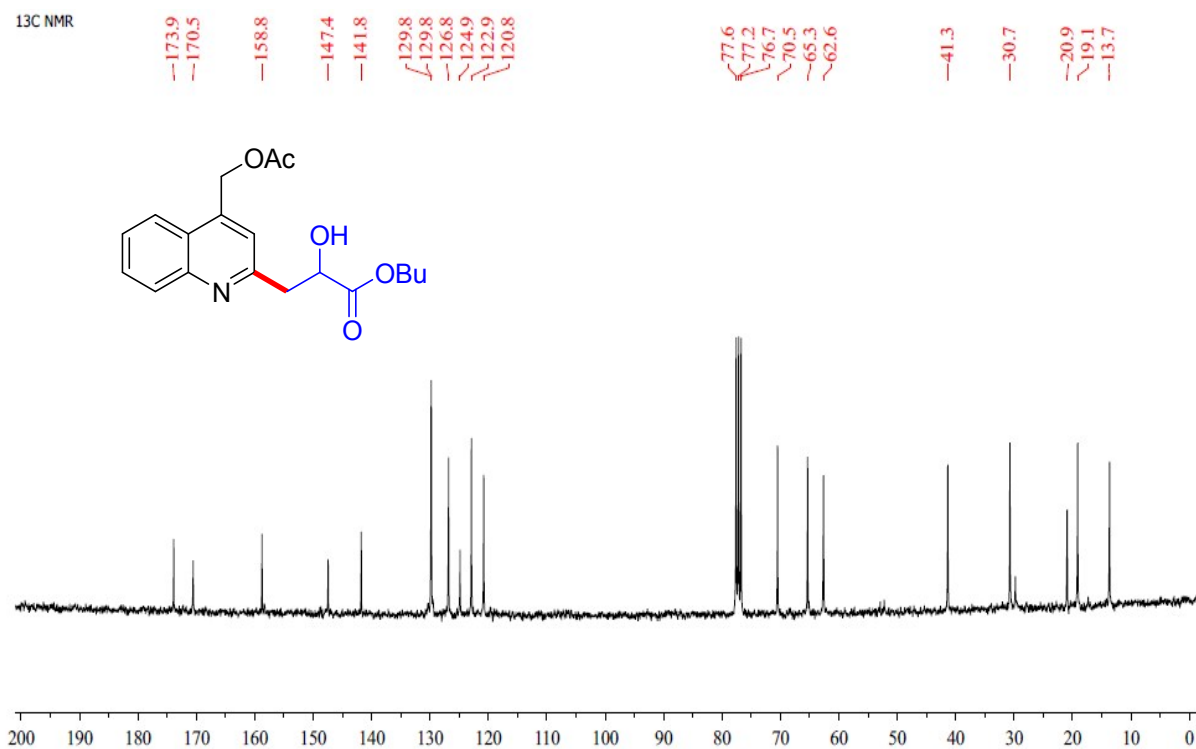

**butyl 2-hydroxy-3-(6-isopropylquinolin-2-yl)propanoate (Table 2, entry 3q)**

<sup>1</sup>H NMR (600 MHz, CDCl<sub>3</sub>)

<sup>1</sup>H NMR peaks (ppm): 8.040, 8.026, 7.926, 7.911, 7.563, 7.568, 7.557, 7.243, 4.752, 4.746, 4.741, 4.735, 4.138, 4.127, 4.115, 3.480, 3.474, 3.455, 3.448, 3.392, 3.381, 3.367, 3.355, 3.348, 3.084, 3.073, 3.061, 3.050, 1.557, 1.546, 1.535, 1.533, 1.321, 1.276, 1.263, 1.250, 0.838, 0.820, 0.807

butyl 2-hydroxy-3-(6-isopropylquinolin-2-yl)propanoate

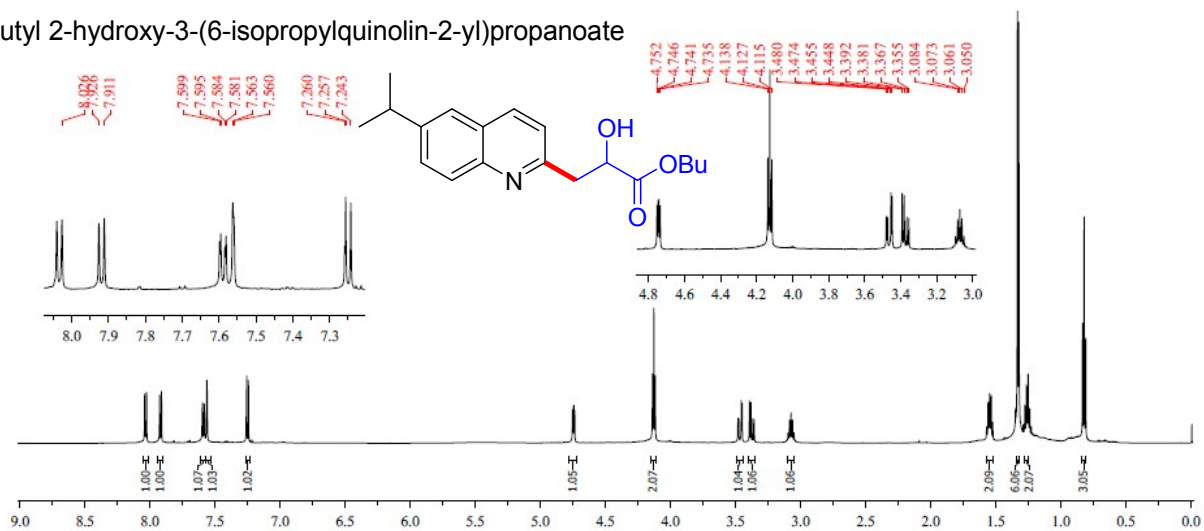

<sup>13</sup>C NMR (150 MHz, CDCl<sub>3</sub>)

<sup>13</sup>C NMR peaks (ppm): 173.9, 158.0, 147.0, 146.1, 136.6, 129.7, 128.7, 127.1, 123.7, 122.0, 77.4, 77.2, 76.9, 70.7, 65.2, 40.9, 34.1, 30.7, 24.0, 24.0, 19.1, 13.7

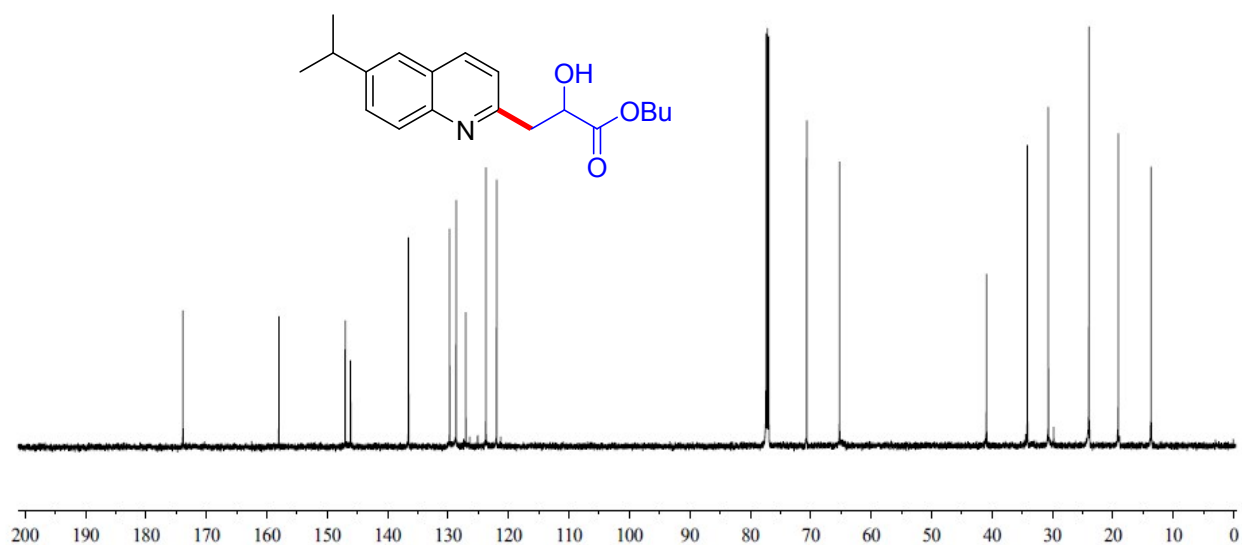

**butyl 3-(6-*tert*-butylquinolin-2-yl)-2-hydroxypropanoate (Table 2, entry 3r)**

**<sup>1</sup>H NMR (600 MHz, CDCl<sub>3</sub>)**

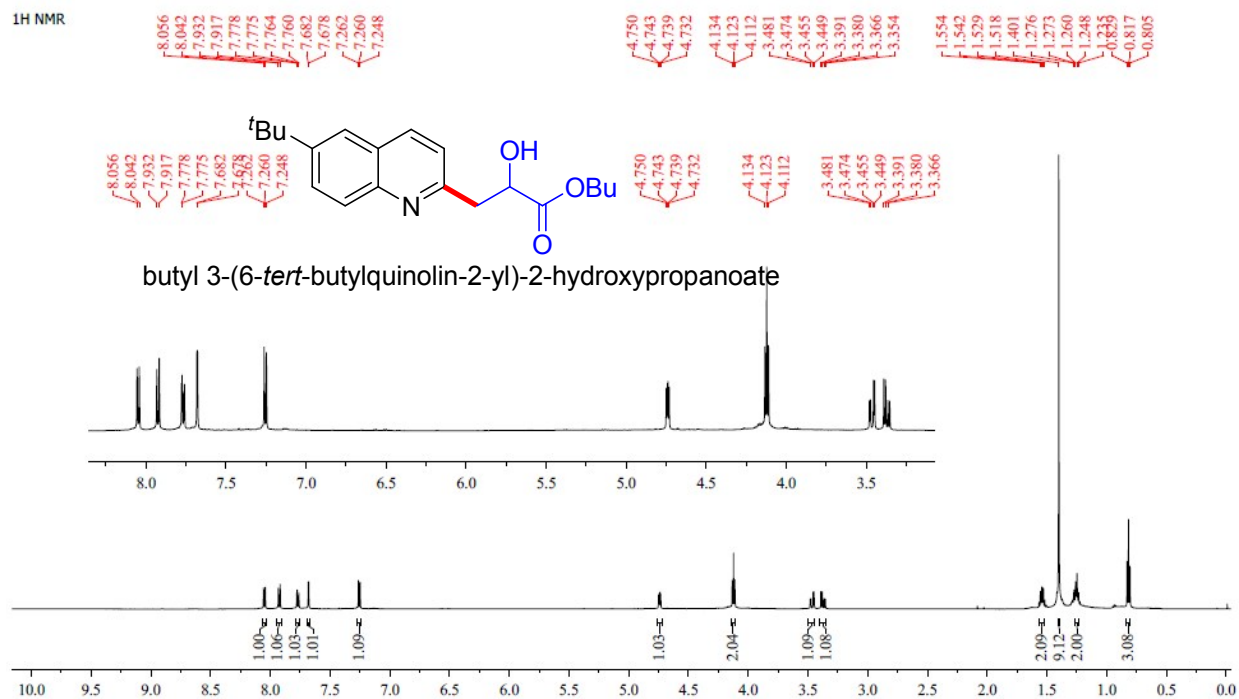

**<sup>13</sup>C NMR (150 MHz, CDCl<sub>3</sub>)**

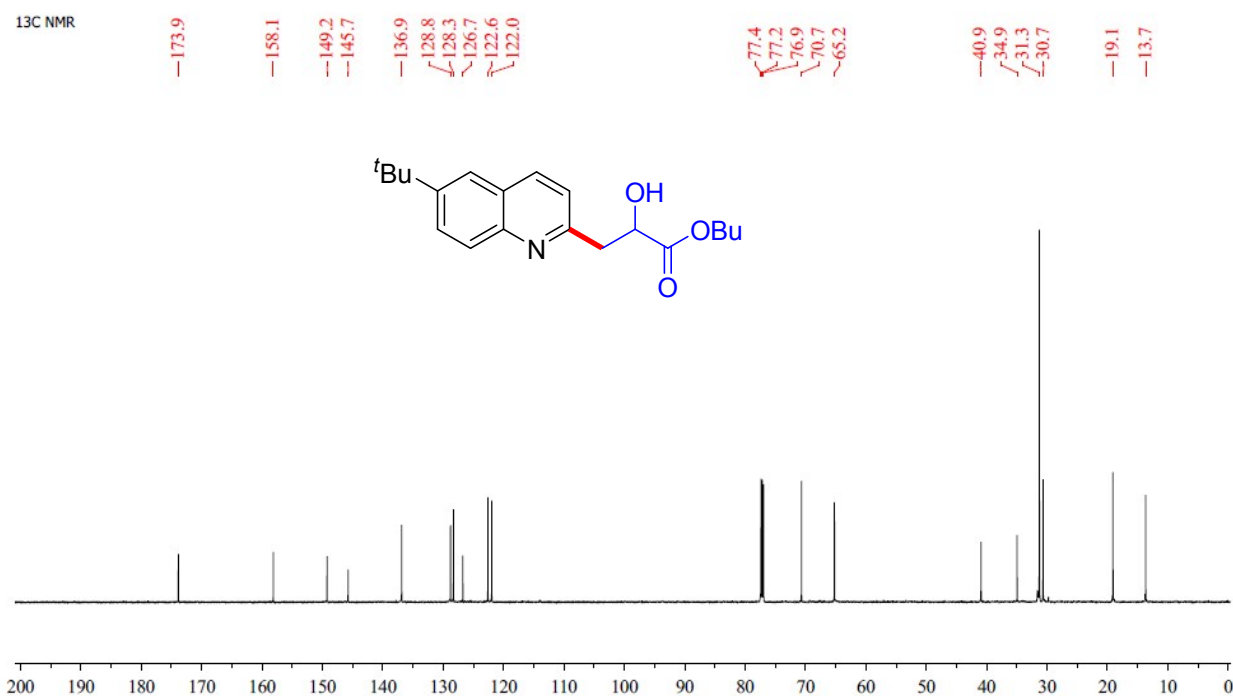

*butyl 2-hydroxy-3-(6-methoxyquinolin-2-yl)propanoate* (Table 2, entry 3s)

$^1\text{H}$  NMR (600 MHz,  $\text{CDCl}_3$ )

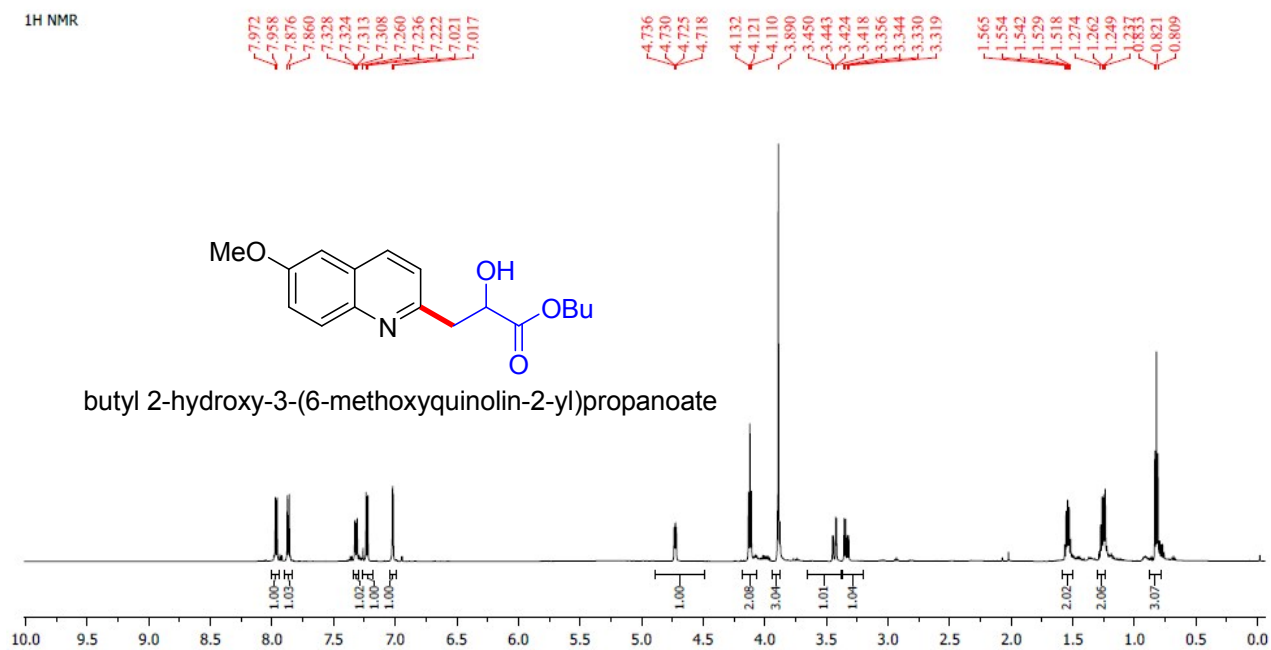

$^{13}\text{C}$  NMR (150 MHz,  $\text{CDCl}_3$ )

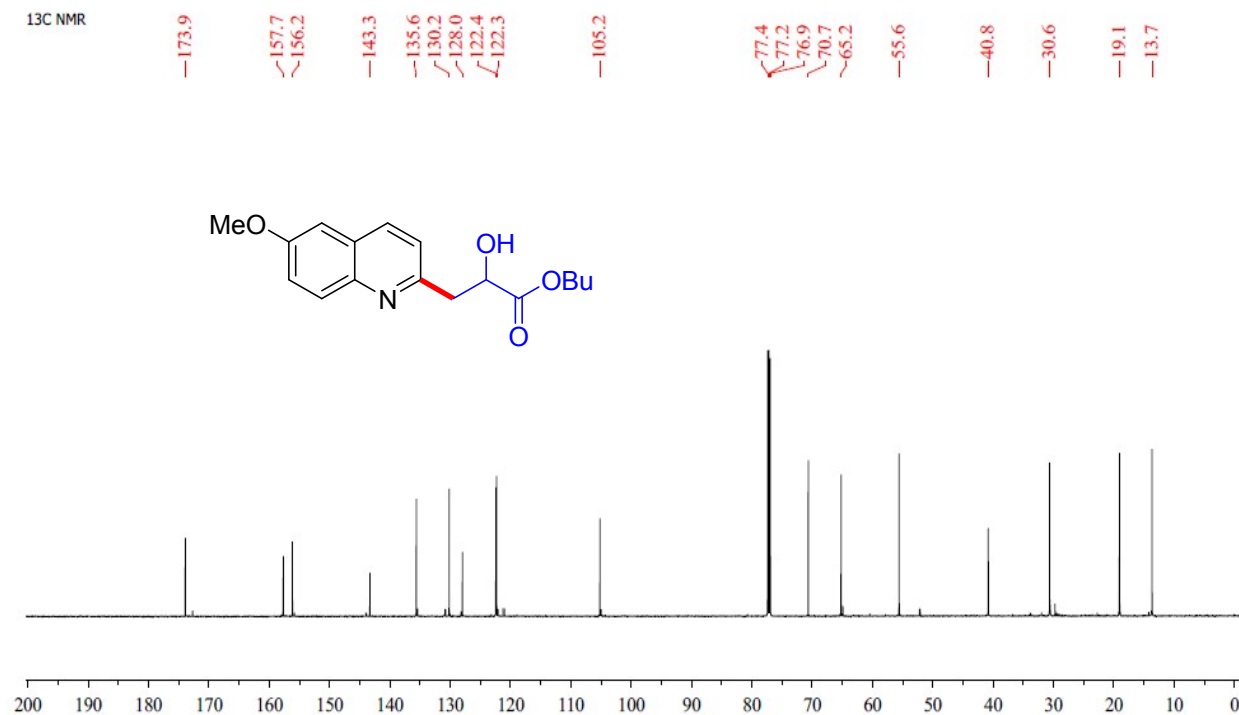

**butyl 3-(6-fluoroquinolin-2-yl)-2-hydroxypropanoate (Table 2, entry 3t)**

**<sup>1</sup>H NMR (600 MHz, CDCl<sub>3</sub>)**

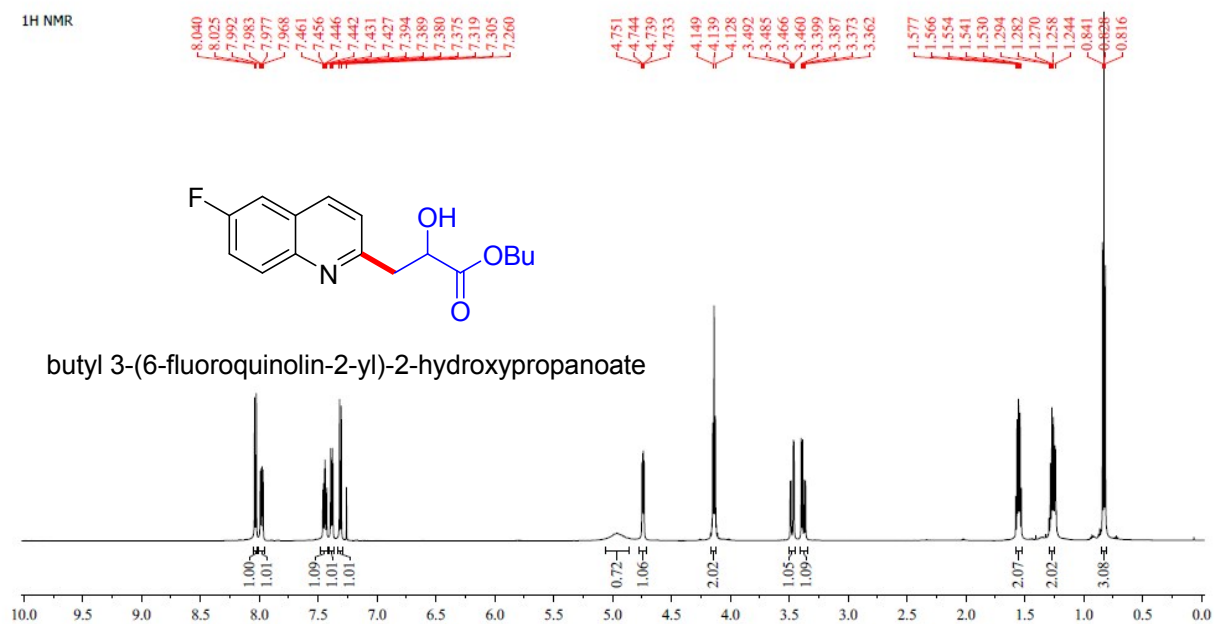

**<sup>13</sup>C NMR (150 MHz, CDCl<sub>3</sub>)**

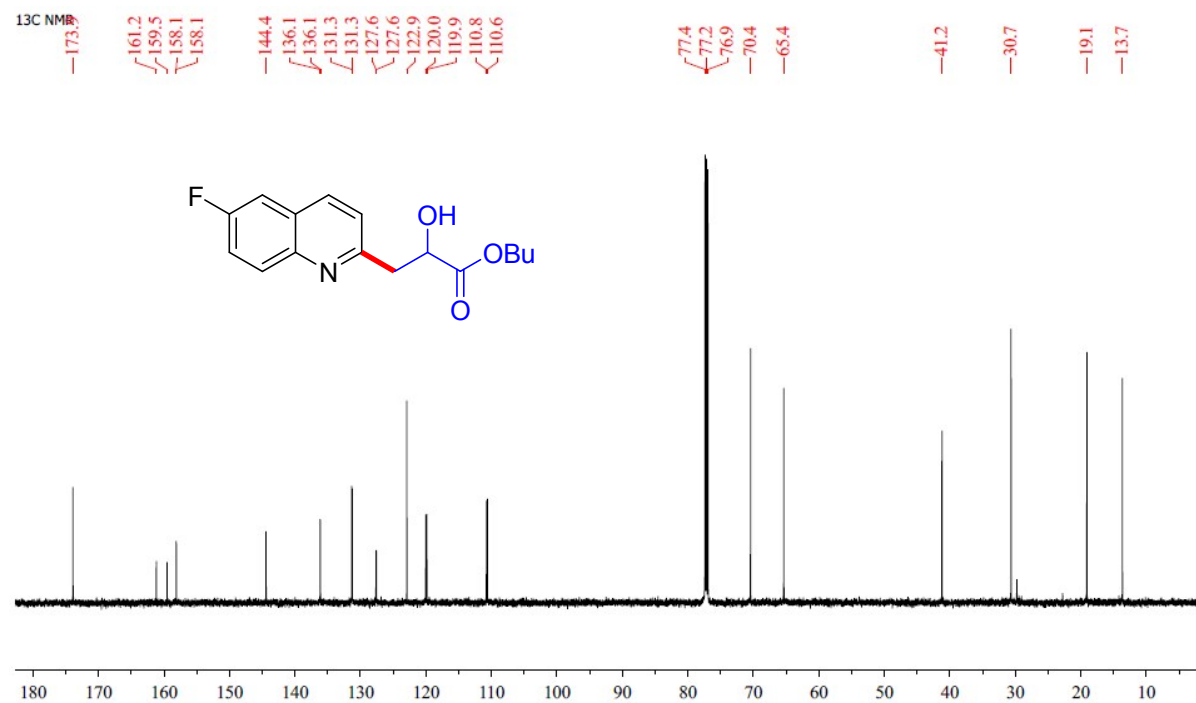

*butyl 3-(6-chloroquinolin-2-yl)-2-hydroxypropanoate (Table 2, entry 3u)*

$^1\text{H NMR}$  (600 MHz,  $\text{CDCl}_3$ )

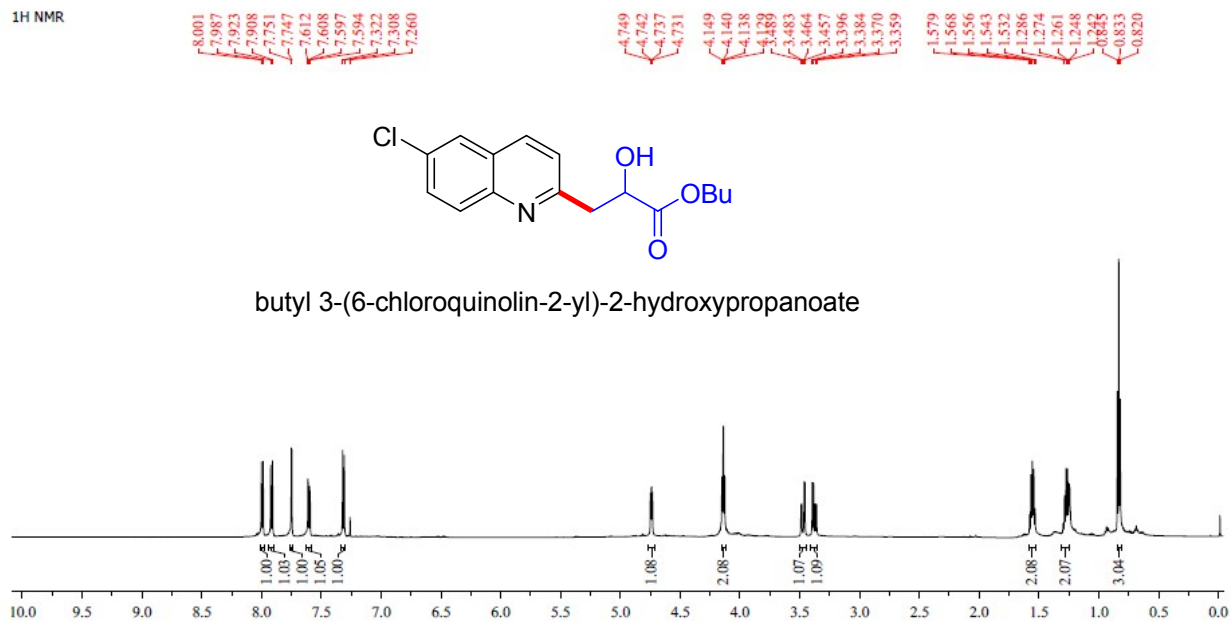

$^{13}\text{C NMR}$  (150 MHz,  $\text{CDCl}_3$ )

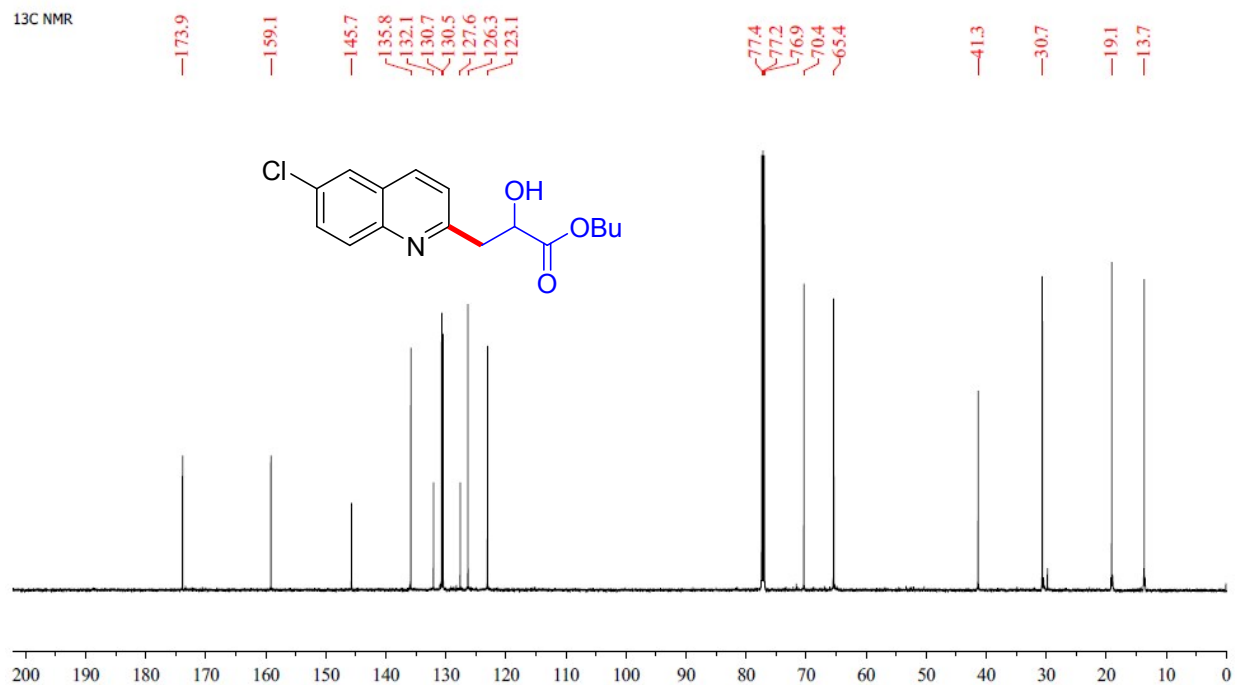

*butyl 3-(6-bromoquinolin-2-yl)-2-hydroxypropanoate (Table 2, entry 3v)*

<sup>1</sup>H NMR (300 MHz, CDCl<sub>3</sub>)

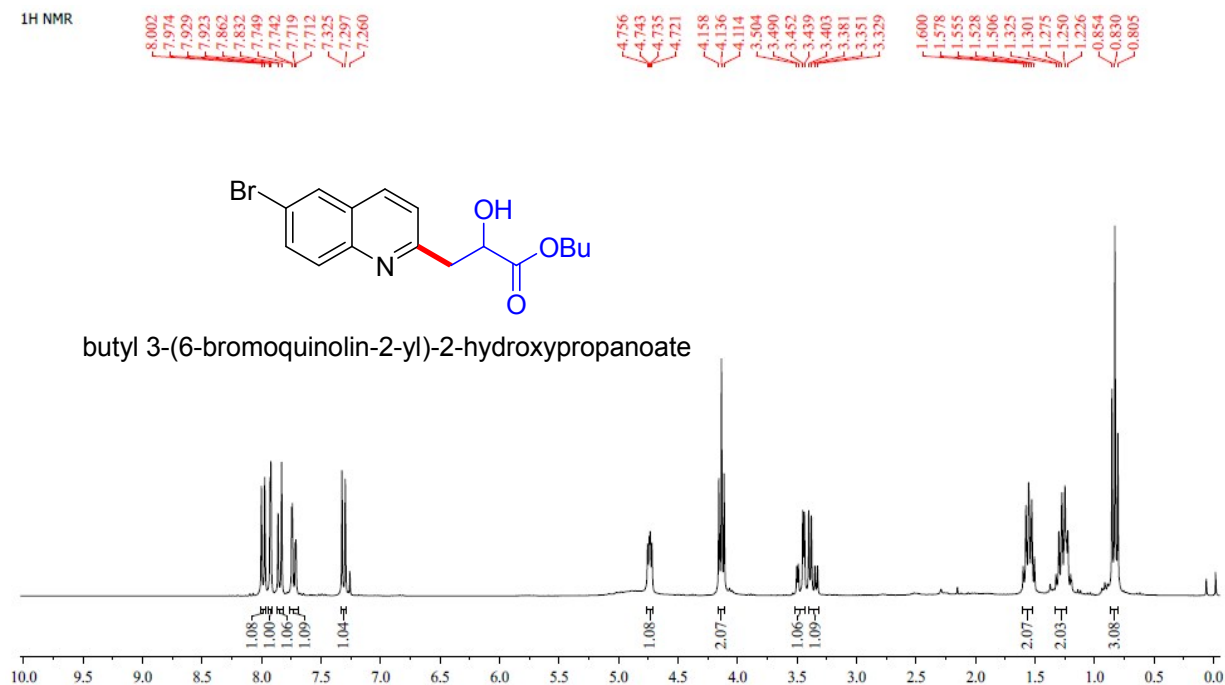

<sup>13</sup>C NMR (75 MHz, CDCl<sub>3</sub>)

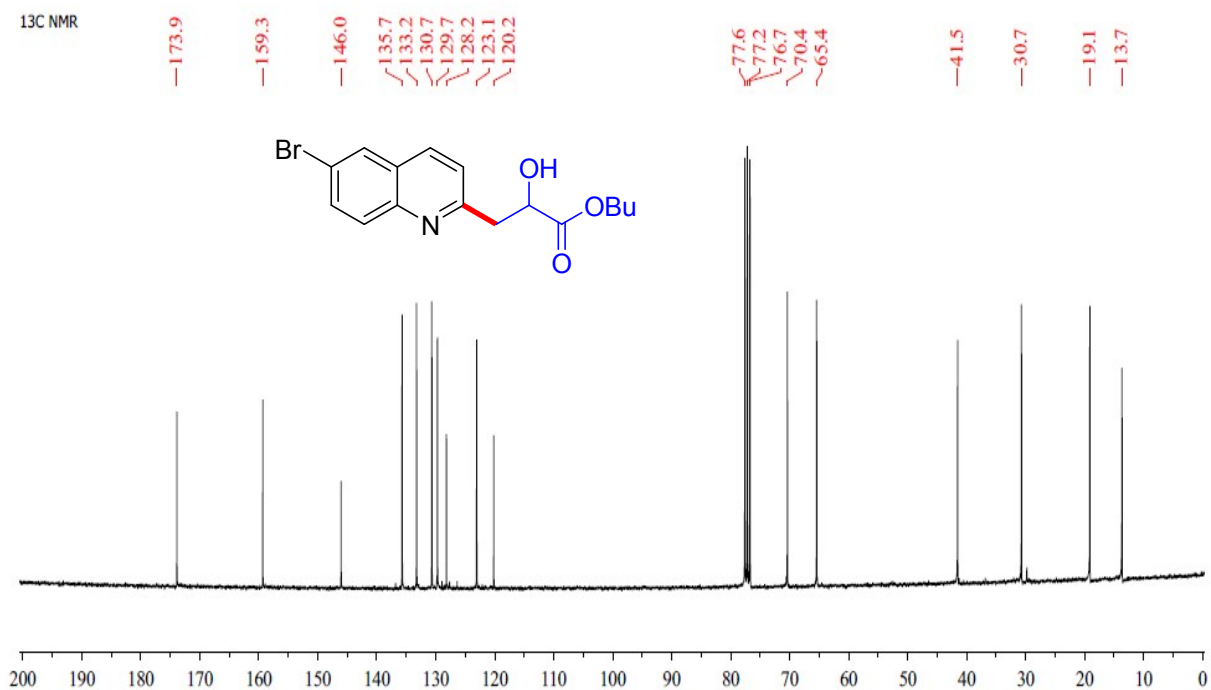

*methyl 2-(2-(butoxycarbonyl)-2-hydroxyethyl)quinoline-6-carboxylate*

(Table 2, entry 3w)

<sup>1</sup>H NMR (600 MHz, CDCl<sub>3</sub>)

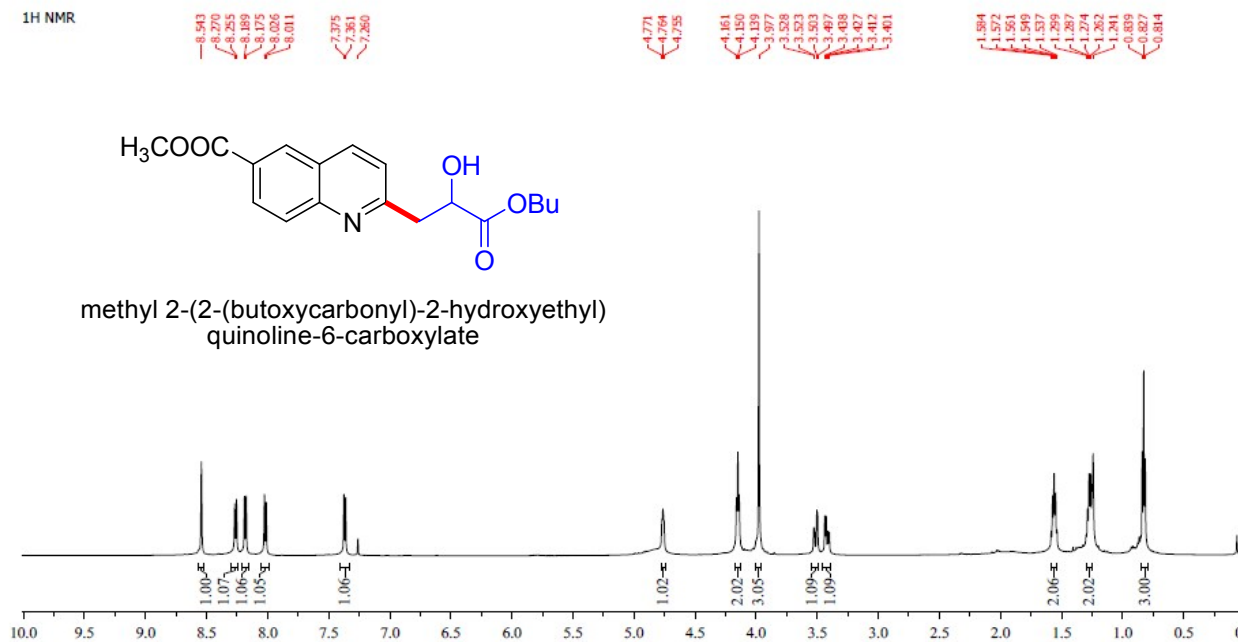

<sup>13</sup>C NMR (150 MHz, CDCl<sub>3</sub>)

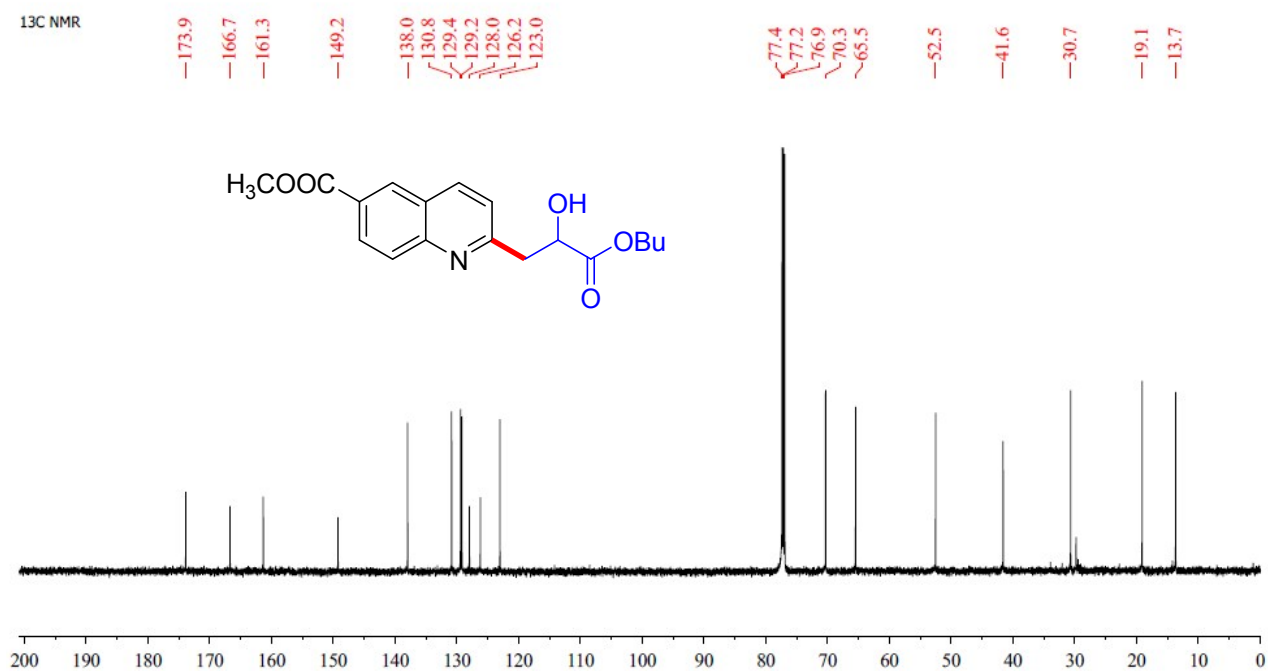



*di-tert-butyl 2-(2-(2-(butoxycarbonyl)-2-hydroxyethyl)quinolin-6-yl)malonate*  
(Table 2, entry 3x)

<sup>1</sup>H NMR (600 MHz, CDCl<sub>3</sub>)

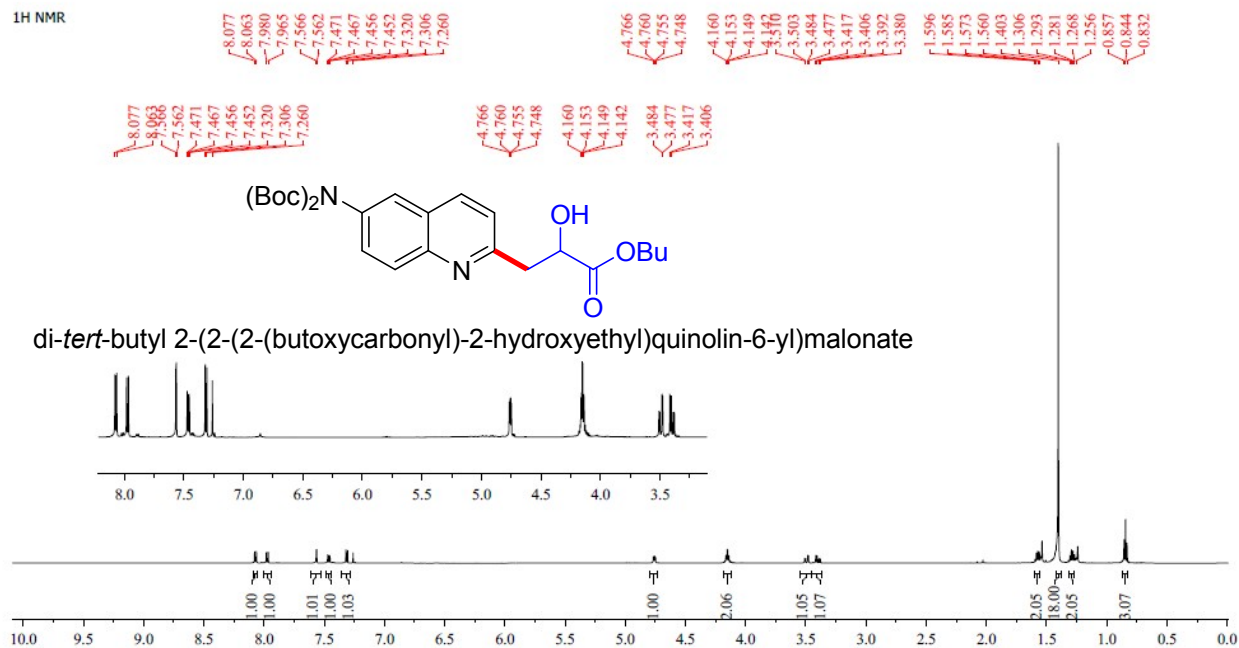

<sup>13</sup>C NMR (150 MHz, CDCl<sub>3</sub>)

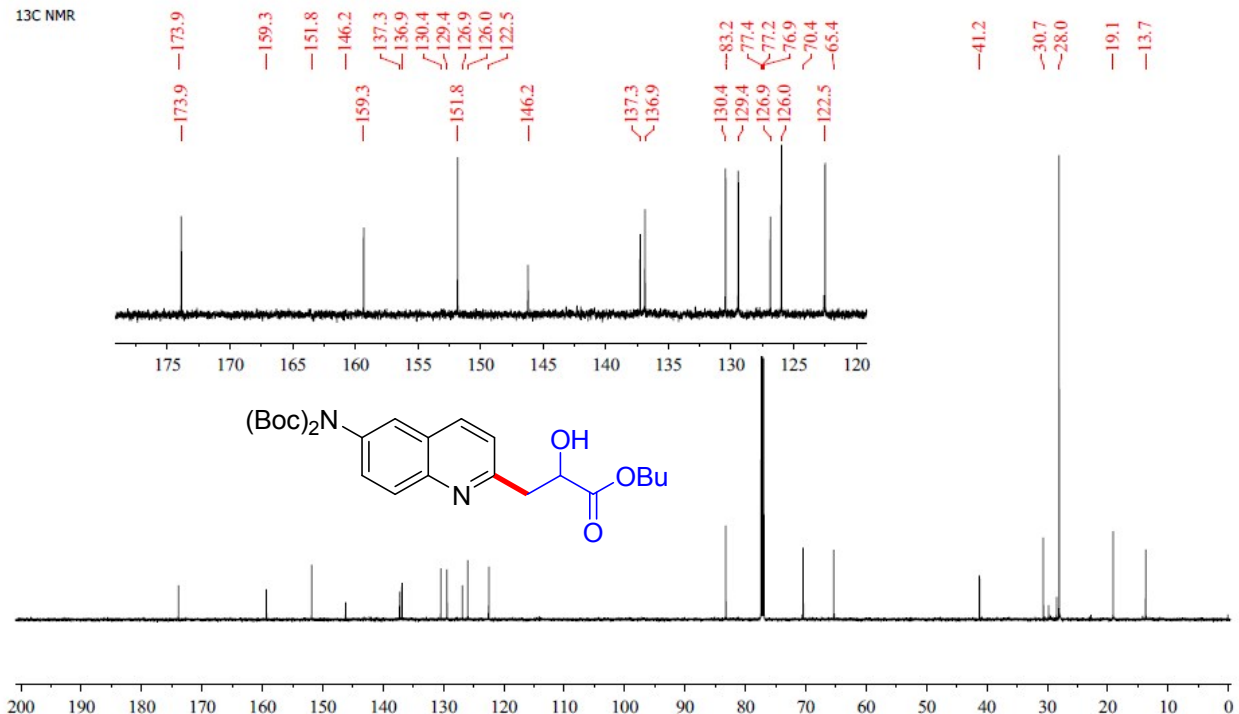

**butyl 2-hydroxy-3-(phenanthridin-6-yl)propanoate (Table 2 , entry 3z)**

**<sup>1</sup>H NMR (300 MHz, CDCl<sub>3</sub>)**

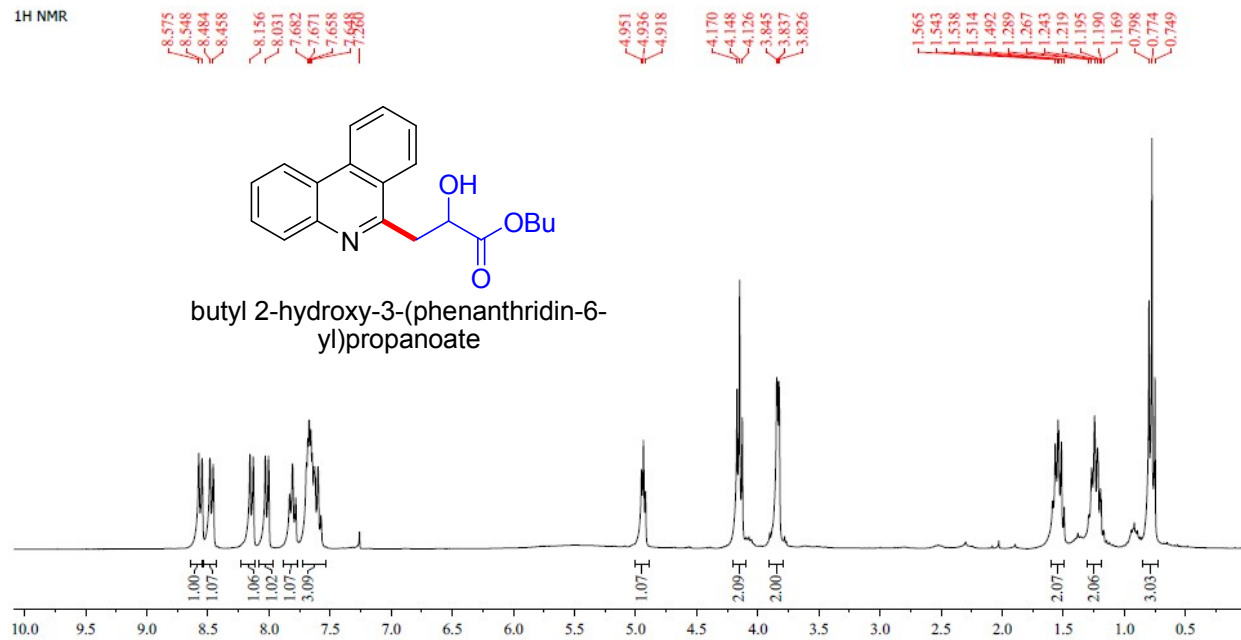

**<sup>13</sup>C NMR (75 MHz, CDCl<sub>3</sub>)**

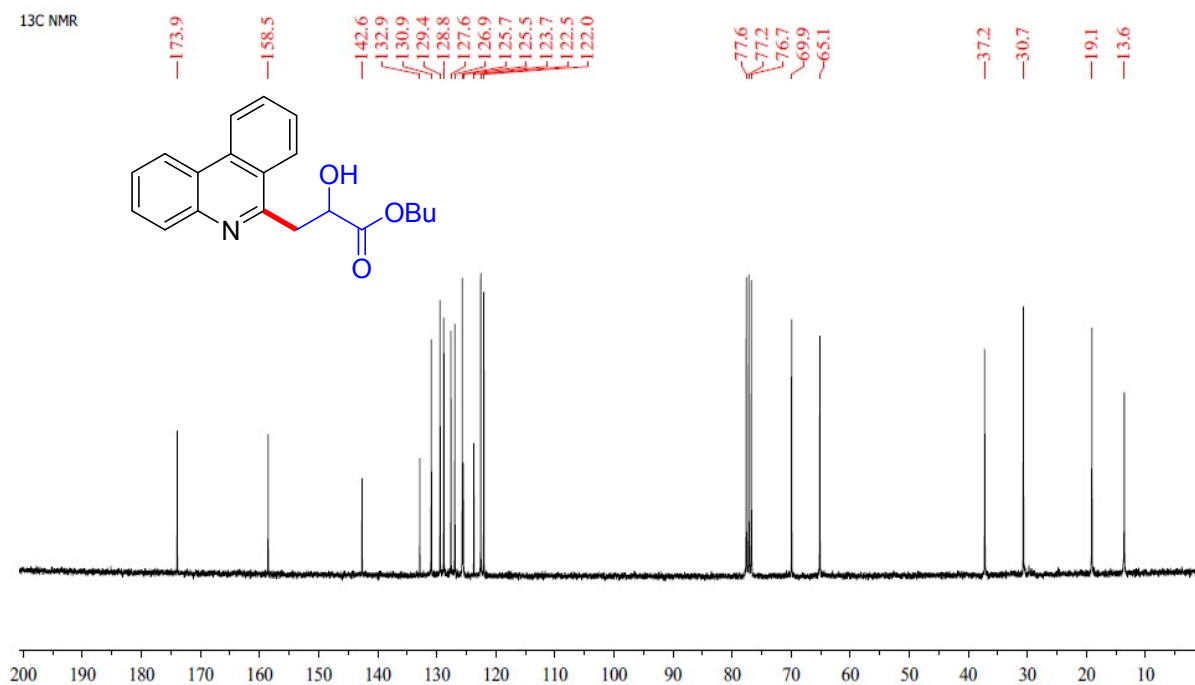

*butyl 3-(benzo[f]quinolin-3-yl)-2-hydroxypropanoate (Table 2, entry 3za)*

$^1\text{H NMR}$  (600 MHz,  $\text{CDCl}_3$ )

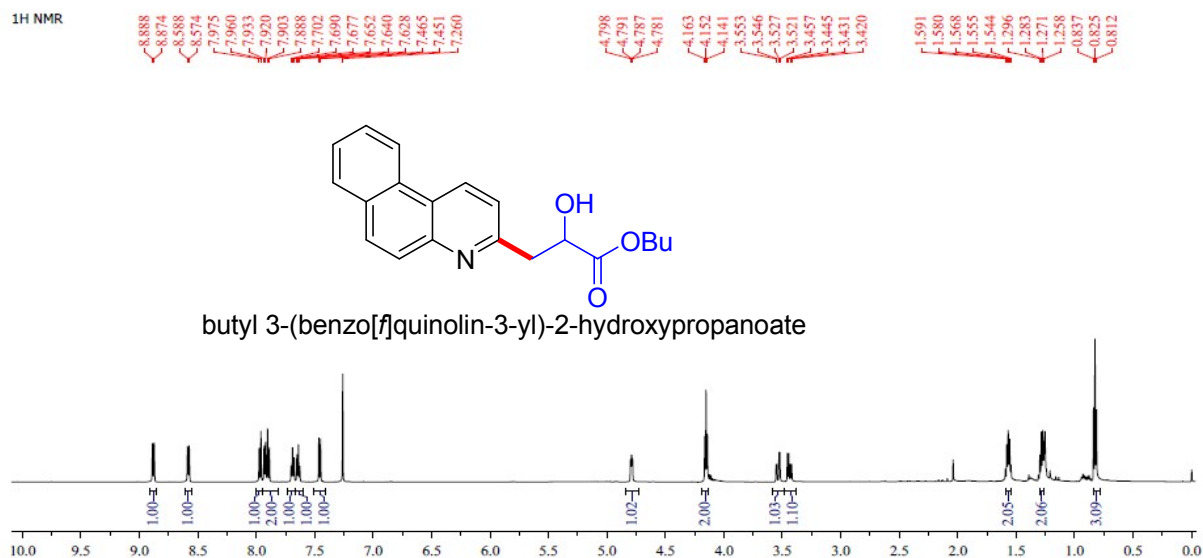

$^{13}\text{C NMR}$  (150 MHz,  $\text{CDCl}_3$ )

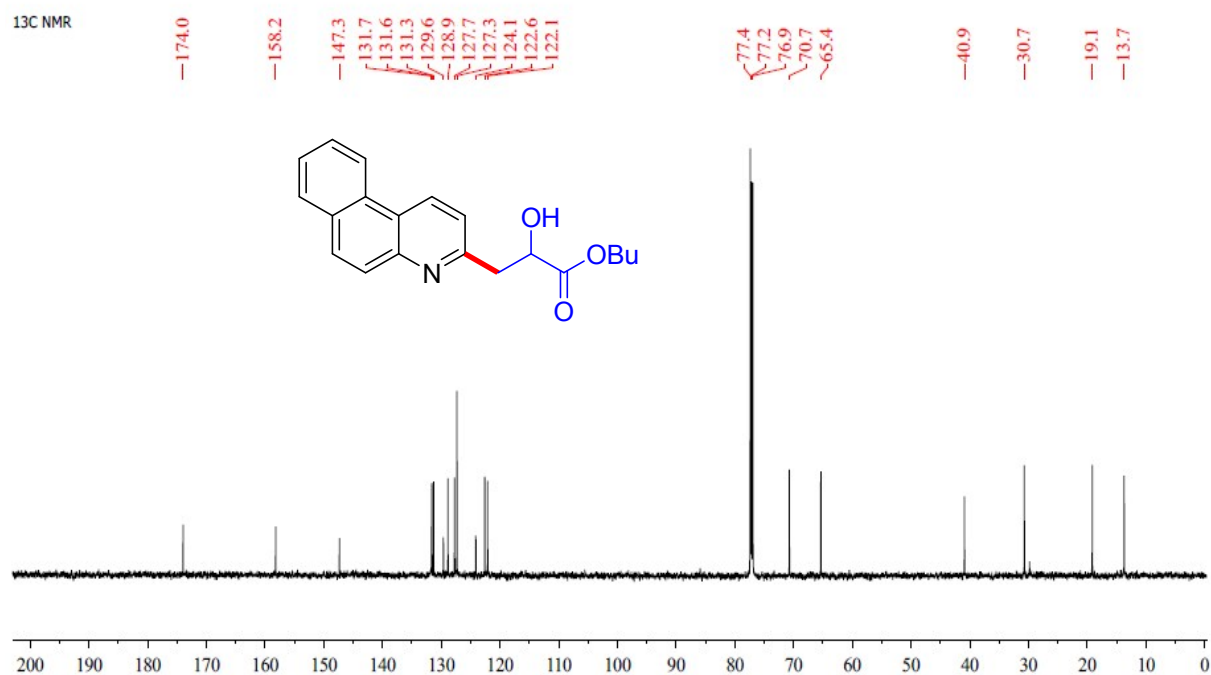

**3,4-dihydro-2,5,7,8-tetramethyl-2-(4,8,12-trimethyltridecyl)-2H-chromen-6-yl 2-hydroxy-3-(quinolin-2-yl)propanoate (Table 2, entry 3zb)**

<sup>1</sup>H NMR (600 MHz, CDCl<sub>3</sub>)

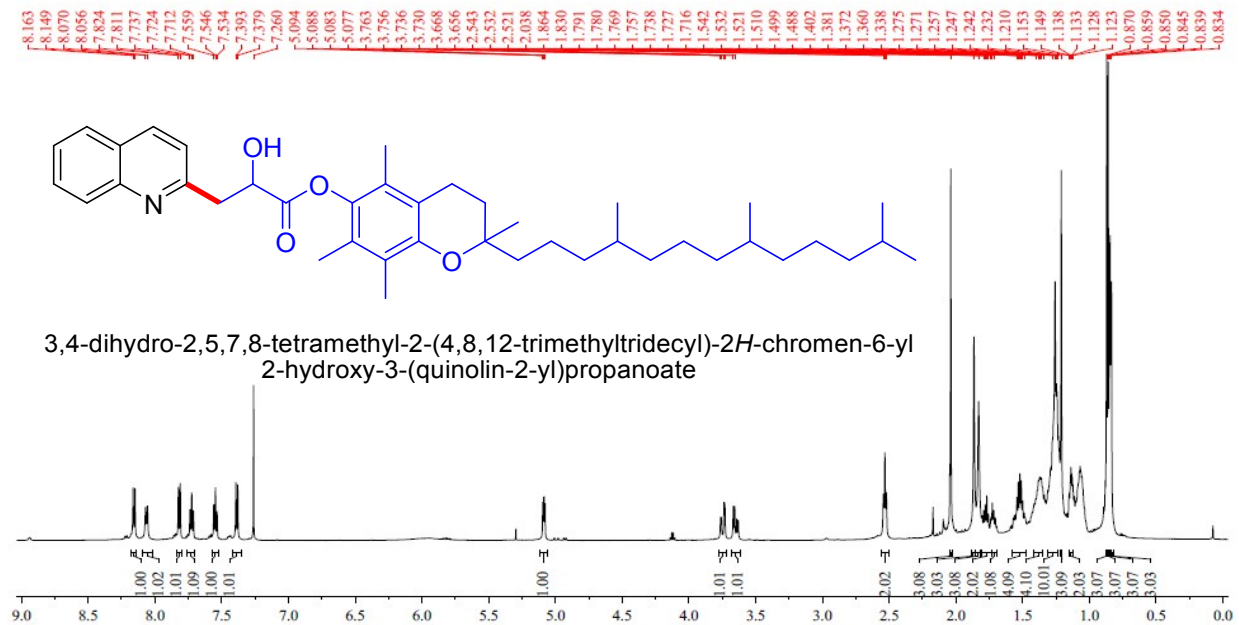

<sup>13</sup>C NMR (150 MHz, CDCl<sub>3</sub>)

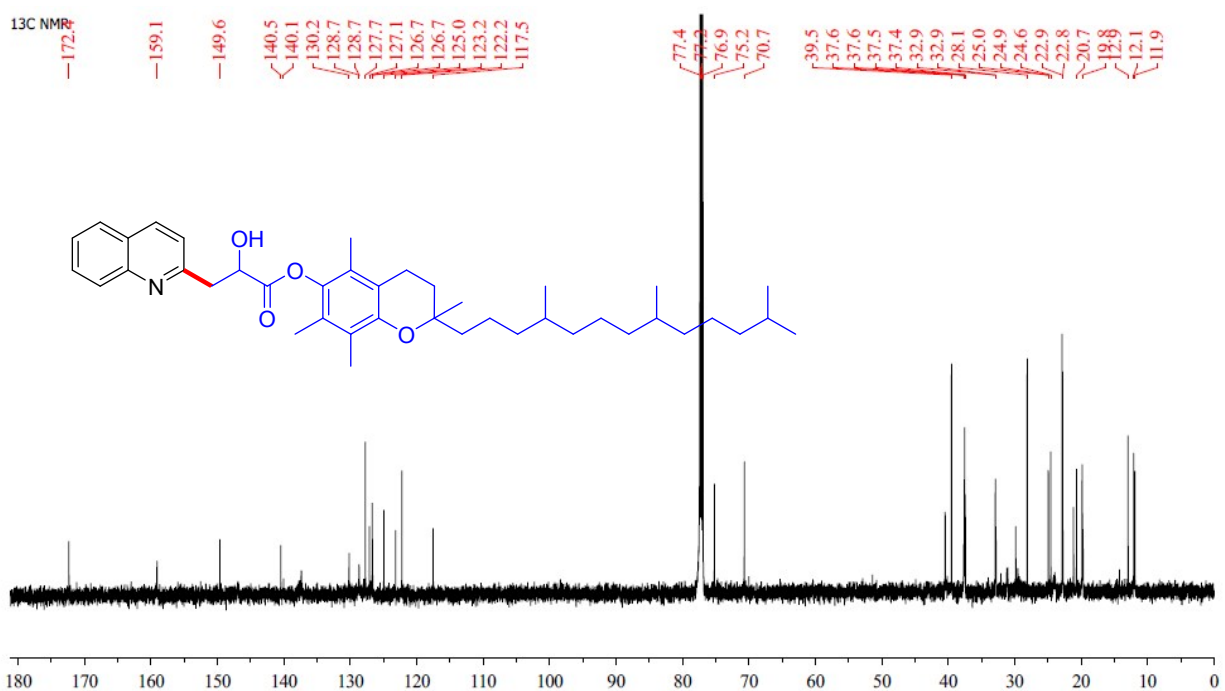

Supplement: c5ob02600h2.pdf [file c5ob02600h2.pdf]
