# Supplementary material for: Catalyst and solvent-free alkylation of quinoline N-oxides with olefins: A direct access to quinoline-substituted α-hydroxy carboxylic derivatives
Source: Royal Society of Chemistry journal article supplement (doi:10.1039/c5ob02600h), 2016-01-01
Supplement: c5ob02600h1.pdf [file c5ob02600h1.pdf]

## *Supporting Information*

### **Catalyst and Solvent-Free alkylation of Quinoline *N*-oxide with olefins: Direct Access to Quinoline Substituted $\alpha$ -Hydroxy Carboxylic Derivatives**

Rakesh Kumar,<sup>ab</sup> Inder Kumar,<sup>ab</sup> Ritika Sharma<sup>ab</sup> and Upendra Sharma<sup>\*ab</sup>

<sup>†</sup>Natural Product Chemistry and Process Development Division, CSIR- IHBAT, Palampur, India

<sup>‡</sup>Academy of Scientific and Innovative Research, CSIR-IHBAT, Palampur, India

#### ***Table of Contents***

| <b>Entry</b> | <b>Title</b>                                                                            | <b>Page No.</b> |
|--------------|-----------------------------------------------------------------------------------------|-----------------|
| 1            | General consideration                                                                   | 2-2             |
| 2            | Preparation of quinoline <i>N</i> -oxides                                               | 2-3             |
| 3            | Quinoline <i>N</i> -oxide reaction with acrylates                                       | 3-13            |
| 3.1          | <i>Optimization details</i>                                                             | 3-4             |
| 3.2          | <i>General Procedure for C-2 alkylation of Quinoline <i>N</i>-Oxides with Acrylates</i> | 4               |
| 3.3          | <i>Procedure for gram scale reaction</i>                                                | 4-5             |
| 3.4          | <i>Characterization data</i>                                                            | 5-13            |
| 4            | Mechanistic study                                                                       | 13-16           |
| 5            | General Procedure for Conversion of 3a to 4a                                            | 16              |
| 6            | Reference                                                                               | 16              |

## 1. General consideration

**Reagent Information:** Unless otherwise stated, all reactions were carried out under air atmosphere in screw cap reaction vials. All solvents were bought from Aldrich in sure-seal bottle and used as such. All chemicals were bought from Sigma Aldrich, Alfa-aesar and TCI. For column chromatography, silica gel (230-400 mesh) from Merck was used. A gradient elution using *n*-hexane and ethyl acetate was performed based on Merck aluminium TLC sheets (silica gel 60F<sub>254</sub>).

**Analytical information:** The melting points were recorded on a Bronsted Electro thermal 9100. All isolated compounds are characterized by <sup>1</sup>H NMR, <sup>13</sup>C NMR and LC-MS. In addition, all the compounds are further characterized by HRMS. Mass spectra were recorded on Water Q-ToF-Micro Micromass. Copies of <sup>1</sup>H, <sup>13</sup>C NMR can be found in the NMR supporting information.

Nuclear magnetic resonance spectra were recorded either on a Bruker-Avance 600 or 300 MHz instrument. All <sup>1</sup>H NMR experiments are reported in units, parts per million (ppm) and were measured relative to the signals for residual chloroform (7.26) in the deuterated solvents. All <sup>13</sup>C NMR spectra were reported in ppm relative to deuterated chloroform (77.23) and all were obtained with <sup>1</sup>H decoupling. Optimization studies were done by NMR and NMR yield were calculated by using TCE as internal standard.

## 2. Preparation of Quinoline *N*-Oxides

### General procedure for the preparation of Quinoline *N*-Oxide<sup>[1]</sup>

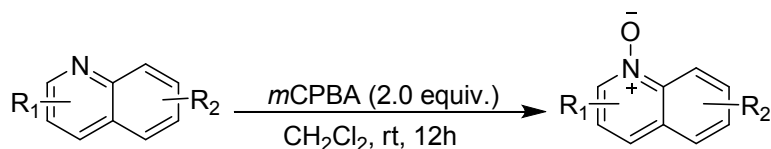

All quinoline *N*-oxide were prepared according to literature procedure with slight modification. All solid reactants, *m*-CPBA (4.0 mmol) and quinoline (2.0 mmol) were added in schlenk tube and put under vacuum for 2h, then CH<sub>2</sub>Cl<sub>2</sub> (4 ml) was added at 0°C. The reaction was allowed to stir at room temperature for 12h. On completion, the reaction mixture was extracted with ethyl

acetate and organic extract was dried over Na<sub>2</sub>SO<sub>4</sub>, filtered and concentrated under reduced pressure. The crude product was purified by flash chromatography on silica gel (230-400 mesh size) with *n*-hexane: EtOAc to afford desired *N*-Oxide.

### 3. Quinoline *N*-oxide Reaction with Acrylates

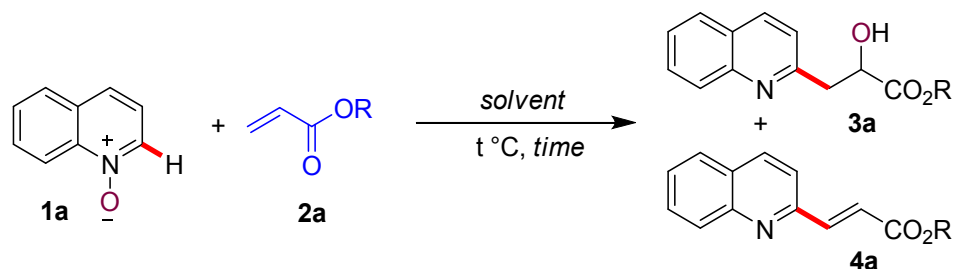

#### 3.1 Optimization detail

To an oven-dried screw cap reaction vial charged with a spin vane magnetic stir-bar, quinoline *N*-oxide (0.1 mmol), acrylate (*X* equiv.), and solvent (0.5 ml) were added. The reaction vial was closed with screw cap and kept for vigorous stirring on a preheated oil bath at variable temperature for variable time. After completion, reaction mixture was allowed to cool down to room temperature and extracted with ethyl acetate. Ethyl acetate layer was dried over anhydrous Na<sub>2</sub>SO<sub>4</sub>. Ethyl acetate was removed completely under reduced pressure. The crude yield was measured by <sup>1</sup>H NMR using 1,1,2,2-tetrachloroethane as internal standard.

**Table S1:** Optimization Study.

| Entry | 2a (equiv.) | T (°C) | Time | Solvent                      | Conv. | NMR Yield (%) <sup>b</sup> | 3a/4a |
|-------|-------------|--------|------|------------------------------|-------|----------------------------|-------|
| 1     | 5           | 110    | 24h  | <i>N</i> -methyl pyrrolidone | <5    | n.d.                       | -     |
| 2     | 5           | 110    | 24h  | <i>N</i> -methyl pyrrolidine | 100   | 46                         | 94:6  |
| 3     | 5           | 110    | 24h  | <i>N</i> -methyl morpholine  | 22    | 16                         | 73:27 |
| 4     | 5           | 110    | 24h  | DMSO                         | 21    | 9                          | 43:57 |
| 5     | 5           | 110    | 24h  | Toluene                      | <5    | n.d.                       | -     |
| 6     | 5           | 110    | 24h  | DCE                          | <5    | n.d.                       | -     |
| 7     | 5           | 110    | 24h  | DMF                          | <5    | n.d.                       | -     |
| 8     | 5           | 110    | 24h  | TFT                          | <5    | n.d.                       | -     |
| 9     | 5           | 110    | 24h  | 1-4 dioxane                  | <5    | n.d.                       | -     |

|           |          |            |            |      |           |           |             |
|-----------|----------|------------|------------|------|-----------|-----------|-------------|
| 10        | 5        | 110        | 24h        | HFIP | <5        | n.d.      | -           |
| 11        | 20       | r.t.       | 24h        | -    | <5        | n.d.      | -           |
| 12        | 20       | 60         | 24h        | -    | 15        | 15        | 100:0       |
| 13        | 20       | 90         | 24h        | -    | 35        | 33        | 100:0       |
| 14        | 20       | 110        | 24h        | -    | 65        | 58        | 94:6        |
| 15        | 20       | 130        | 24h        | -    | 73        | 28        | 49:51       |
| 16        | 15       | 110        | 24h        | -    | 91        | 64        | 82:18       |
| 17        | 10       | 110        | 24h        | -    | 86        | 63        | 81:19       |
| 18        | 5        | 110        | 24h        | -    | 100       | 43        | 55:45       |
| 19        | 4        | 100        | 24h        | -    | 100       | 53        | 66:34       |
| 20        | 20       | 100        | 48h        | -    | 100       | 67        | 71:29       |
| 21        | 4        | 100        | 20h        | -    | 100       | 66        | 78:22       |
| <b>22</b> | <b>4</b> | <b>100</b> | <b>15h</b> | -    | <b>84</b> | <b>78</b> | <b>95:5</b> |
| 23        | 4        | 100        | 12h        | -    | 75        | 63        | 94:6        |
| 24        | 4        | 100        | 5h         | -    | 25        | 25        | 100:0       |
| 25        | 4        | 100        | 10h        | -    | 59        | 56        | 100:0       |
| 26        | 4        | 100        | 11h        | -    | 64        | 57        | >99:1       |
| 27        | 4        | 100        | 14h        | -    | 76        | 70        | 96:4        |
| 28        | 4        | 100        | 16h        | -    | 86        | 75        | 90:10       |
| 29        | 4        | 100        | 18h        | -    | 90        | 75        | 90:10       |
| 30        | 4        | 100        | 20h        | -    | 100       | 66        | 77:23       |
| 31        | 4        | 100        | 24h        | -    | 100       | 53        | 66:34       |

### 3.2 General Procedure for C-2 alkylation of Quinoline *N*-Oxides with Acrylates

Unless otherwise stated, to an oven-dried screw cap reaction vial charged with a spin vane magnetic stir-bar, quinoline *N*-oxide (0.3 mmol) and acrylate (4 equiv.) were added. The reaction vial was closed with screw cap and kept for vigorous stirring on a preheated oil bath at 90-110°C for 5-36 h depending on the particular substrate. After completion, reaction mixture was allowed to cool down to room temperature and extracted with ethyl acetate. Ethyl acetate layer was dried over anhydrous Na<sub>2</sub>SO<sub>4</sub> and concentrated under reduced pressure. Residue was purified by flash chromatography using silica gel (230-400 mesh size) and *n*-hexane: EtOAc as eluent.

### 3.3 Procedure for gram scale reaction

To a screw capped vial with a spin vane triangular shaped stir bar, quinoline *N*-oxide (6.0 mmol, 1.086 g) and ethyl acrylate (4.0 equiv., 2.56 ml) were added. The reaction was stirred at 100°C

for 15h. After completion, reaction mixture was allowed to cool down to room temperature and extracted with ethyl acetate. Ethyl acetate layer was dried over anhydrous  $\text{Na}_2\text{SO}_4$  and concentrated under reduced pressure. Residue was purified by flash chromatography using silica gel (230-400 mesh size) and *n*-hexane: EtOAc as eluent to give the final product in 69% (1.01 g) yield.

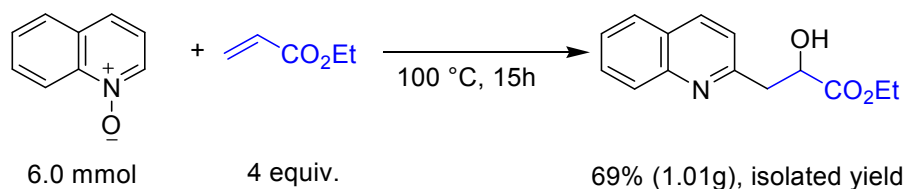

### 3.4 Characterization data

**ethyl 2-hydroxy-3-(quinolin-2-yl)propanoate (Table 2 , entry 3a)**<sup>[2]</sup> Colourless

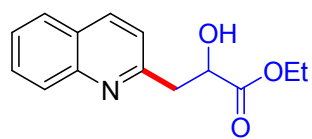

crystals (78%); mp 109 °C;  $^1\text{H}$  NMR (600 MHz,  $\text{CDCl}_3$ )  $\delta$  8.09 (d,  $J = 8.4$  Hz, 1H), 7.99 (d,  $J = 8.4$  Hz, 1H), 7.78 (d,  $J = 8.4$  Hz, 1H), 7.67 – 7.70 (m, 1H), 7.49 – 7.52 (m, 1H), 7.29 (d,  $J = 8.4$  Hz, 1H), 4.75 – 4.77 (m, 1H), 4.21 (q,  $J = 7.2$  Hz, 2H), 3.49 (dd,  $J = 15.6, 4.2$  Hz, 1H), 3.40 (dd,  $J = 15.6, 7.2$  Hz, 1H), 1.22 – 1.23 (m, 3H);  $^{13}\text{C}$  NMR (150 MHz,  $\text{CDCl}_3$ )  $\delta$  173.8, 158.9, 147.3, 136.9, 129.9, 128.9, 127.7, 127.0, 126.4, 122.1, 70.6, 61.4, 41.1, 14.3; HRMS (ESI)  $m/z$  calcd for  $\text{C}_{14}\text{H}_{16}\text{NO}_3$   $[\text{M}+\text{H}]^+$  246.1150, found 246.1109.

**methyl 2-hydroxy-3-(quinolin-2-yl)propanoate (Table 2, entry 3b)** Orange solid

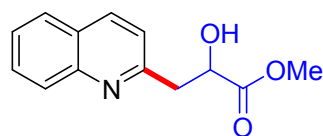

(48%); mp 90 °C;  $^1\text{H}$  NMR (600 MHz,  $\text{CDCl}_3$ )  $\delta$  8.11 (d,  $J = 8.4$  Hz, 1H), 8.00 (d,  $J = 9.0$  Hz, 1H), 7.79 (d,  $J = 8.4$  Hz, 1H), 7.69 (t,  $J = 7.8$  Hz, 1H), 7.50 – 7.53 (m, 1H), 7.30 (d,  $J = 8.4$  Hz, 1H). 4.78 – 4.80 (m, 1H), 3.76 (s, 3H), 3.50 (dd,  $J = 15.6, 3.6$  Hz, 1H), 3.42 (dd,  $J = 15.6, 7.2$  Hz, 1H);  $^{13}\text{C}$  NMR (150 MHz,  $\text{CDCl}_3$ )  $\delta$  174.2, 158.8, 147.1, 137.1, 130.0, 128.7, 127.7, 127.1, 126.5, 122.1, 70.5, 52.5, 40.8; HRMS (ESI)  $m/z$  calcd for  $\text{C}_{13}\text{H}_{14}\text{NO}_3$   $[\text{M}+\text{H}]^+$  232.0968, found 232.0988.

**butyl 2-hydroxy-3-(quinolin-2-yl)propanoate (Table 2, entry 3c)** Yellow resin

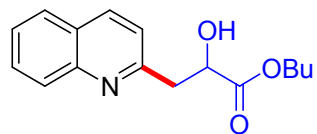

(73%);  $^1\text{H NMR}$  (600 MHz,  $\text{CDCl}_3$ )  $\delta$  8.07 (d,  $J = 8.4$  Hz, 1H), 7.98 (d,  $J = 8.4$  Hz, 1H), 7.76 (d,  $J = 8.0$  Hz, 1H), 7.65-7.68 (m, 1H), 7.47-7.50 (m, 1H), 7.28 (d,  $J = 8.4$  Hz, 1H), 4.75 - 4.76 (m, 1H), 4.12 - 4.14 (m, 2H), 3.37 - 3.49 (m, 2H), 1.52 - 1.56 (m, 2H), 1.23-1.28 (m, 2H), 0.81 (t,  $J = 7.2$  Hz, 3H);  $^{13}\text{C NMR}$  (151 MHz,  $\text{CDCl}_3$ )  $\delta$  173.9, 158.9, 147.2, 136.8, 129.8, 128.8, 127.6, 127.0, 126.3, 122.1, 70.5, 65.2, 41.1, 30.6, 19.1, 13.6; HRMS (ESI)  $m/z$  calculated for  $\text{C}_{16}\text{H}_{20}\text{NO}_3$   $[\text{M}+\text{H}]^+$  274.1438, found 274.1415.

**tert-butyl 2-hydroxy-3-(quinolin-2-yl)propanoate (Table 2, entry 3d)** Orange resin

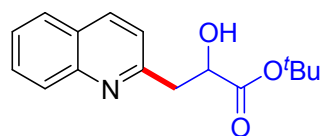

(75%);  $^1\text{H NMR}$  (300 MHz,  $\text{CDCl}_3$ )  $\delta$  8.07 (d,  $J = 8.4$  Hz, 1H), 7.99 (d,  $J = 8.4$  Hz, 1H), 7.76 (d,  $J = 8.1$  Hz, 1H), 7.63 - 7.69 (m, 1H), 7.45 - 7.50 (m, 1H), 7.30 (d,  $J = 8.4$  Hz, 1H), 4.62 (dd,  $J = 6.6, 4.2$  Hz, 1H), 3.30 - 3.48 (m, 2H), 1.39 (s, 9H);  $^{13}\text{C NMR}$  (75 MHz,  $\text{CDCl}_3$ )  $\delta$  173.1, 158.9, 147.5, 136.5, 129.7, 128.9, 127.6, 127.0, 126.2, 122.2, 82.0, 70.7, 41.9, 28.1; HRMS (ESI)  $m/z$  calcd for  $\text{C}_{16}\text{H}_{20}\text{NO}_3$   $[\text{M}+\text{H}]^+$  274.1438, found 274.1419.

**benzyl 2-hydroxy-3-(quinolin-2-yl)propanoate (Table 2, entry 3e)** White solid

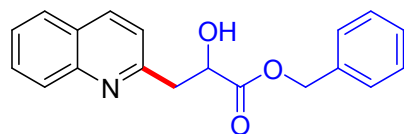

(77%); mp 102 °C;  $^1\text{H NMR}$  (600 MHz,  $\text{CDCl}_3$ )  $\delta$  8.10 (d,  $J = 8.4$  Hz, 1H), 8.01 (d,  $J = 8.4$  Hz, 1H), 7.82 (d,  $J = 7.8$  Hz, 1H), 7.72 - 7.74 (m, 1H), 7.55 - 7.57 (m, 1H), 7.26 - 7.30 (m, 6H), 5.21 (s, 2H), 4.85 (dd,  $J = 6.0, 4.2$  Hz, 1H), 3.55 (dd,  $J = 15.6, 4.2$  Hz, 1H), 3.48 (dd,  $J = 15.6, 6.6$  Hz, 1H);  $^{13}\text{C NMR}$  (150 MHz,  $\text{CDCl}_3$ )  $\delta$  173.6, 158.8, 137.1, 137.1, 135.6, 130.0, 128.8, 128.8, 128.6, 128.4, 127.7, 127.1, 126.5, 122.1, 70.6, 67.1, 40.7; HRMS (ESI)  $m/z$  calcd for  $\text{C}_{19}\text{H}_{18}\text{NO}_3$   $[\text{M}+\text{H}]^+$  308.1281, found 308.1265.

**3,3,4,4,5,5,6,6,7,7,8,8,9,9,10,10,10-heptafluorodecyl 2-hydroxy-3-(quinolin-2-yl)propanoate (Table 2, entry 3f)** Yellow solid

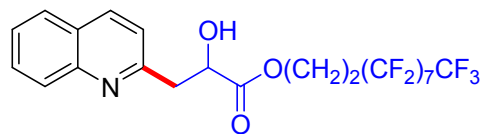

(59%); mp 82 °C;  $^1\text{H NMR}$  (600 MHz,  $\text{CDCl}_3$ )  $\delta$  8.11 (d,  $J = 8.4$  Hz, 1H), 7.99 (d,  $J = 8.4$  Hz, 1H), 7.79 (d,  $J = 7.8$  Hz, 1H), 7.68 - 7.71 (m, 1H), 7.51 - 7.53 (m, 1H), 7.29 (d,  $J = 8.4$  Hz, 1H), 4.78 - 4.80 (m, 1H), 4.40 - 4.48 (m, 2H), 3.50 - 3.53 (m, 1H), 3.43 - 3.48 (m, 1H), 2.35 - 2.46 (m, 2H);  $^{13}\text{C NMR}$

(150 MHz, CDCl<sub>3</sub>)  $\delta$  173.4, 158.6, 147.1, 137.2, 130.1, 128.7, 127.1, 126.6, 122.0, 119.9 – 120.4 (m), 119.0 – 119.5 (m), 117.3 – 118.5 (m), 115.6 – 116.6 (m), 114.2 – 114.7 (m), 112.0 – 113.0 (m), 110.2 – 111.3 (m), 108.2 – 109.3 (m), 70.4, 57.1, 40.5, 30.5 - 30.8 (m); HRMS (ESI) m/z calcd for C<sub>22</sub>H<sub>15</sub>F<sub>17</sub>NO<sub>3</sub> [M+H]<sup>+</sup> 664.0275, found 664.0265.

***N-tert-butyl-2-hydroxy-3-(quinolin-2-yl)propanamide*** (Table 2, entry 3g) Yellow

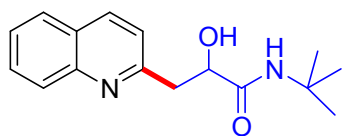

resin (36%); <sup>1</sup>H NMR (600 MHz, CDCl<sub>3</sub>)  $\delta$  8.12 (d, *J* = 8.4 Hz, 1H), 7.98 (d, *J* = 8.4 Hz, 1H), 7.80 (d, *J* = 7.8 Hz, 1H), 7.71 (t, *J* = 7.2 Hz, 1H), 7.51 – 7.54 (m, 1H), 7.32 (d, *J* = 8.4 Hz, 1H), 6.99 (s, 1H), 4.51 (dd, *J* = 7.8, 3.6 Hz, 1H), 3.50 (dd, *J* = 15.6, 3.6 Hz, 1H), 3.28 (dd, *J* = 15.6, 7.8 Hz, 1H), 1.29 (s, 9H); <sup>13</sup>C NMR (150 MHz, CDCl<sub>3</sub>)  $\delta$  172.3, 160.2, 146.6, 137.4, 130.1, 128.2, 127.9, 127.1, 126.5, 122.5, 71.7, 50.8, 40.0, 28.8; HRMS (ESI) m/z calcd for C<sub>16</sub>H<sub>21</sub>N<sub>2</sub>O<sub>2</sub> [M+H]<sup>+</sup> 273.1598, found 273.1579.

***butyl 2-hydroxy-2-(quinolin-2-yl)methyl)propanoate*** (Table 2, entry 3h) Pale

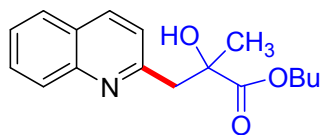

yellow liquid (56%); <sup>1</sup>H NMR (600 MHz, CDCl<sub>3</sub>)  $\delta$  8.08 (d, *J* = 8.4 Hz, 1H), 7.97 (d, *J* = 8.4 Hz, 1H), 7.77 (d, *J* = 8.4 Hz, 1H), 7.66 – 7.69 (m, 1H), 7.48 – 7.51 (m, 1H), 7.26 (d, *J* = 8.4 Hz, 1H), 3.99 – 4.03 (m, 2H), 3.55 (d, *J* = 15.0 Hz, 1H), 3.26 (d, *J* = 15.0 Hz, 1H), 1.58 (s, 3H), 1.40 – 1.45 (m, 2H), 1.11 – 1.17 (m, 2H), 0.71 – 0.73 (m, 3H); <sup>13</sup>C NMR (150 MHz, CDCl<sub>3</sub>)  $\delta$  176.2, 159.2, 146.9, 136.9, 129.9, 128.8, 127.6, 127.0, 126.4, 122.3, 75.3, 65.1, 46.4, 30.7, 26.6, 19.0, 13.6.

***butyl 2-hydroxy-3-(3-methylquinolin-2-yl)propanoate*** (Table 2, entry 3i) Green

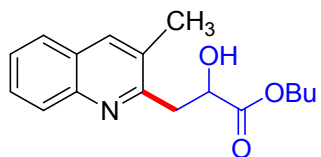

resin (66%); <sup>1</sup>H NMR (600 MHz, CDCl<sub>3</sub>)  $\delta$  7.93 (d, *J* = 8.4 Hz, 1H), 7.88 (s, 1H), 7.70 (d, *J* = 8.4 Hz, 1H), 7.60 – 7.62 (m, 1H), 7.45 - 7.48 (m, 1H), 4.83 (dd, *J* = 6.0, 4.2 Hz, 1H), 4.13 - 4.16 (m, 2H), 3.37 - 3.45 (m, 2H), 2.44 (s, 3H), 1.54 – 1.59 (m, 2H), 1.24 - 1.27 (m, 2H), 0.80 - 0.82 (m, 3H); <sup>13</sup>C NMR (150 MHz, CDCl<sub>3</sub>)  $\delta$  174.0, 158.8, 145.6, 136.3, 130.1, 128.9, 128.4, 127.4, 126.9, 126.4, 70.2, 65.1, 37.5, 30.7, 19.1, 19.1, 13.7; HRMS (ESI) m/z calcd for C<sub>17</sub>H<sub>22</sub>NO<sub>3</sub> [M+H]<sup>+</sup> 288.1594, found 288.1584.

**butyl 2-hydroxy-3-(4-methylquinolin-2-yl)propanoate (Table 2, entry 3j)** Orange

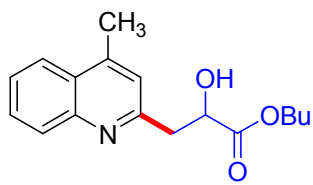

resin (55%);  $^1\text{H NMR}$  (300 MHz,  $\text{CDCl}_3$ )  $\delta$  7.95 (dd,  $J = 13.8, 8.4$  Hz, 2H), 7.62-7.67 (m, 1H), 7.49-7.52 (m, 1H), 7.11 (s, 1H), 4.74 (dd,  $J = 6.6, 3.9$  Hz, 1H), 4.13 (t,  $J = 6.6$  Hz, 2H), 3.32-3.44 (m, 2H), 2.65 (s, 3H), 1.49-1.56 (m, 2H), 1.24 – 1.30 (m, 2H), 0.79-0.84 (m, 3H);  $^{13}\text{C NMR}$  (75 MHz,  $\text{CDCl}_3$ )  $\delta$  173.9, 158.6, 147.1, 145.1, 129.4, 127.1, 126.1, 123.7, 122.7, 70.6, 65.2, 41.0, 30.7, 19.1, 18.6, 13.6; HRMS (ESI)  $m/z$  calcd for  $\text{C}_{17}\text{H}_{22}\text{NO}_3$   $[\text{M}+\text{H}]^+$  288.1594, found 288.1581.

**butyl 2-hydroxy-3-(6-methylquinolin-2-yl)propanoate (Table 2, entry 3k)** orange

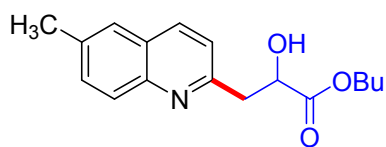

solid (68%); mp 44 °C;  $^1\text{H NMR}$  (600 MHz,  $\text{CDCl}_3$ )  $\delta$  7.98 (d,  $J = 8.4$  Hz, 1H), 7.87 (d,  $J = 9.0$  Hz, 1H), 7.49 – 7.52 (m, 2H), 7.23 (d,  $J = 8.4$  Hz, 1H), 4.73 – 4.75 (m, 1H), 4.12 (t,  $J = 6.6$  Hz, 2H), 3.44 – 3.47 (m, 1H), 3.34 – 3.38 (m, 1H), 2.50 (s, 3H), 1.52 – 1.57 (m, 2H), 1.23 – 1.29 (m, 2H), 0.81 – 0.83 (m, 3H);  $^{13}\text{C NMR}$  (150 MHz,  $\text{CDCl}_3$ )  $\delta$  173.9, 157.9, 145.8, 136.2, 132.0, 128.5, 127.0, 126.5, 122.0, 70.6, 65.2, 40.9, 30.6, 29.8, 21.6, 19.1, 13.6; HRMS (ESI)  $m/z$  calculated for  $\text{C}_{17}\text{H}_{22}\text{NO}_3$   $[\text{M}+\text{H}]^+$  288.1594, found 288.1574.

**butyl 2-hydroxy-3-(3-(1,3-dioxoisindolin-2-yl)quinolin-2-yl)propanoate (Table**

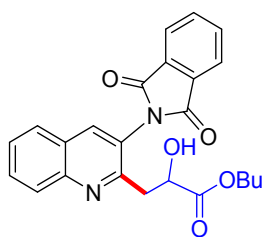

**2, entry 3m)** Yellow solid (46%); mp 127 °C;  $^1\text{H NMR}$  (600 MHz,  $\text{CDCl}_3$ )  $\delta$  8.10 (s, 1H), 8.08 (d,  $J = 8.4$  Hz, 1H), 7.99 - 8.00 (m, 2H), 7.83 – 7.86 (m, 3H), 7.77 – 7.80 (m, 1H), 7.57 – 7.60 (m, 1H), 4.75 (dd,  $J = 6.6, 3.6$  Hz, 1H), 4.09 (t,  $J = 6.6$  Hz, 2H), 3.36 – 3.40 (m, 1H), 3.29 - 3.33 (m, 1H), 1.48 – 1.52 (m, 2H), 1.18 - 1.22 (m, 2H), 0.76 – 0.78 (m, 3H);  $^{13}\text{C NMR}$  (150 MHz,  $\text{CDCl}_3$ )  $\delta$  173.6, 167.2, 167.1, 156.9, 146.9, 137.0, 134.9, 132.0, 131.9, 131.0, 128.8, 127.9, 127.3, 127.0, 125.0, 124.2, 70.0, 65.3, 36.8, 30.6, 19.1, 13.7; HRMS (ESI)  $m/z$  calcd for  $\text{C}_{24}\text{H}_{23}\text{N}_2\text{O}_5$   $[\text{M}+\text{H}]^+$  419.1601, found 419.1589.



**butyl 3-(3-(1,3-dioxolan-2-yl)quinolin-2-yl)-2-hydroxypropanoate (Table 2, entry**

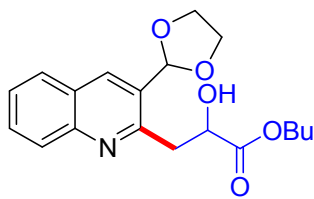

**3n)** Yellow semi-solid (53%);  $^1\text{H}$  NMR (600 MHz,  $\text{CDCl}_3$ )  $\delta$  8.31 (s, 1H), 7.97 (d,  $J = 8.4$  Hz, 1H), 7.80 (d,  $J = 7.8$  Hz, 1H), 7.67 - 7.70 (m, 1H), 7.49 - 7.52 (m, 1H), 6.08 (s, 1H), 4.81 (dd,  $J = 6.0$ , 4.2 Hz, 1H), 4.07 - 4.14 (m, 6H), 3.57 - 3.59 (m, 2H), 1.52 - 1.57

(m, 2H), 1.23-1.27 (m, 2H), 0.80 (t,  $J = 7.2$  Hz, 3H);  $^{13}\text{C}$  NMR (150 MHz,  $\text{CDCl}_3$ )  $\delta$  174.0, 157.7, 146.8, 134.6, 130.3, 129.7, 128.5, 128.0, 126.7, 126.5, 101.4, 70.3, 65.5, 65.4, 65.1, 37.6, 30.7, 19.1, 13.7; HRMS (ESI)  $m/z$  calcd for  $\text{C}_{19}\text{H}_{24}\text{NO}_5$   $[\text{M}+\text{H}]^+$  346.1649, found 346.1635.

**butyl 3-(4-(acetoxymethyl)quinolin-2-yl)-2-hydroxypropanoate (Table 2, entry**

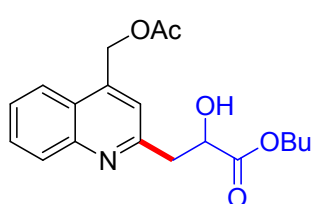

**3p)** Orange resin (61%);  $^1\text{H}$  NMR (300 MHz,  $\text{CDCl}_3$ )  $\delta$  8.03 (d,  $J = 8.4$  Hz, 1H), 7.90 (d,  $J = 8.4$  Hz, 1H), 7.67 - 7.73 (m, 1H), 7.52 - 7.57 (m, 1H), 7.34 (s, 1H), 5.55 (s, 2H), 4.76 (dd,  $J = 6.6$ , 4.2 Hz, 1H), 4.14

(t,  $J = 6.6$  Hz, 2H), 3.36 - 3.53 (m, 2H), 2.17 (s, 3H), 1.52 - 1.61 (m, 2H), 1.24 - 1.33 (m, 2H), 0.80 - 0.85 (m, 3H);  $^{13}\text{C}$  NMR (75 MHz,  $\text{CDCl}_3$ )  $\delta$  173.9, 170.5, 158.8, 147.4, 141.8, 129.8, 129.8, 126.8, 124.9, 122.9, 120.8, 70.5, 65.3, 62.6, 41.3, 30.7, 20.9, 19.1, 13.7; HRMS (ESI)  $m/z$  calcd for  $\text{C}_{19}\text{H}_{24}\text{NO}_5$   $[\text{M}+\text{H}]^+$  346.1649, found 346.1631.

**butyl 2-hydroxy-3-(6-isopropylquinolin-2-yl)propanoate (Table 2, entry 3q)**

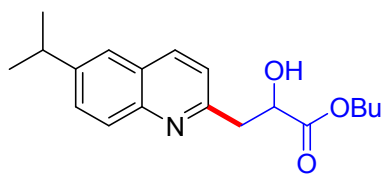

Orange resin (76%);  $^1\text{H}$  NMR (600 MHz,  $\text{CDCl}_3$ )  $\delta$  8.03 (d,  $J = 8.4$  Hz, 1H), 7.92 (d,  $J = 9.0$  Hz, 1H), 7.58 - 7.60 (m, 1H), 7.56 (d,  $J = 1.8$  Hz, 1H), 7.25 (d,  $J = 8.4$  Hz, 1H), 4.74 (dd,  $J = 6.6$ , 3.6 Hz, 1H), 4.12 - 4.14 (m, 2H), 3.45 - 3.48 (m, 1H), 3.36 -

3.39 (m, 1H), 3.05 - 3.08 (m, 1H), 1.52 - 1.56 (m, 2H), 1.33 (d,  $J = 7.2$  Hz, 6H), 1.23 - 1.28 (m, 2H), 0.81 - 0.83 (m, 3H);  $^{13}\text{C}$  NMR (150 MHz,  $\text{CDCl}_3$ )  $\delta$  173.9, 158.0, 147.0, 146.1, 136.6, 129.7, 128.7, 127.1, 123.7, 122.0, 70.7, 65.2, 40.9, 34.1, 30.7, 24.0, 24.0, 19.1, 13.7; HRMS (ESI)  $m/z$  calculated for  $\text{C}_{19}\text{H}_{26}\text{NO}_3$   $[\text{M}+\text{H}]^+$  316.1907, found 316.1894.

**butyl 3-(6-tert-butylquinolin-2-yl)-2-hydroxypropanoate (Table 2, entry 3r)**

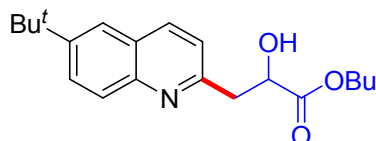

Brown resin (55%);  $^1\text{H}$  NMR (600 MHz,  $\text{CDCl}_3$ )  $\delta$  8.05 (d,  $J = 8.4$  Hz, 1H), 7.92 (d,  $J = 9.0$  Hz, 1H), 7.76 - 7.78 (m, 1H), 7.68 (d,  $J =$

2.4 Hz, 1H), 7.25(d,  $J = 8.4$  Hz, 1H), 4.74 (dd,  $J = 6.6, 4.2$  Hz, 1H), 4.12 (t,  $J = 6.6$  Hz, 2H), 3.45 - 3.48 (m, 1H), 3.35 - 3.39 (m, 1H), 1.52 - 1.57 (m, 2H), 1.40 (s, 9H), 1.22 - 1.28 (m, 2H), 0.82 (t,  $J = 7.2$  Hz, 3H);  $^{13}\text{C}$  NMR (150 MHz,  $\text{CDCl}_3$ )  $\delta$  173.9, 158.1, 149.2, 145.7, 136.9, 128.8, 128.3, 126.7, 122.6, 122.0, 70.7, 65.2, 40.9, 34.9, 31.3, 30.7, 19.1, 13.7; HRMS (ESI)  $m/z$  calcd for  $\text{C}_{20}\text{H}_{28}\text{NO}_3$   $[\text{M}+\text{H}]^+$  330.2064, found 330.2055.

**butyl 2-hydroxy-3-(6-methoxyquinolin-2-yl)propanoate (Table 2, entry 3s)** Brown

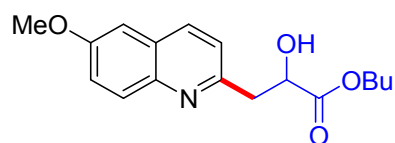

resin (53%);  $^1\text{H}$  NMR (600 MHz,  $\text{CDCl}_3$ )  $\delta$  7.97 (d,  $J = 8.4$  Hz, 1H), 7.87 (d,  $J = 9.6$  Hz, 1H), 7.31 - 7.33 (m, 1H), 7.23 (d,  $J = 8.4$  Hz, 1H), 7.02 (d,  $J = 2.4$  Hz, 1H), 4.72 - 4.74 (m, 1H), 4.12 (t,  $J = 6.6$  Hz, 2H), 3.89 (s, 3H), 3.42 - 3.45 (m, 1H), 3.32 - 3.36 (m, 1H), 1.52 - 1.57 (m, 2H), 1.24 - 1.29 (m, 2H), 0.82 (t,  $J = 7.2$  Hz, 3H);  $^{13}\text{C}$  NMR (150 MHz,  $\text{CDCl}_3$ )  $\delta$  173.9, 157.7, 156.2, 143.3, 135.6, 130.2, 128.0, 122.4, 122.3, 105.2, 70.7, 65.2, 55.6, 40.8, 30.6, 19.1, 13.7; HRMS (ESI)  $m/z$  calcd for  $\text{C}_{17}\text{H}_{22}\text{NO}_4$   $[\text{M}+\text{H}]^+$  304.1543, found 304.1533.

**butyl 3-(6-fluoroquinolin-2-yl)-2-hydroxypropanoate (Table 2, entry 3t)** Orange

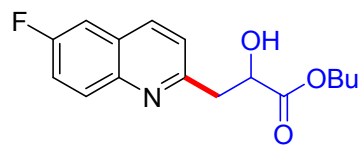

solid (69%); mp 70 °C;  $^1\text{H}$  NMR (600 MHz,  $\text{CDCl}_3$ )  $\delta$  8.03 (d,  $J = 9.0$  Hz, 1H), 7.98 (dd,  $J = 9.0, 5.4$  Hz, 1H), 7.43 - 7.46 (m, 1H), 7.38 (dd,  $J = 8.4, 3.0$  Hz, 1H), 7.31 (d,  $J = 8.4$  Hz, 1H), 4.73 - 4.75 (m, 1H), 4.13 - 4.15 (m, 2H), 3.46 - 3.49 (m, 1H), 3.36 - 3.40 (m, 1H), 1.53 - 1.58 (m, 2H), 1.24 - 1.29 (m, 2H), 0.82 - 0.84 (t,  $J = 7.2$  Hz, 3H);  $^{13}\text{C}$  NMR (150 MHz,  $\text{CDCl}_3$ )  $\delta$  173.9, 160.3 (d,  $J = 246.3$  Hz), 158.1 (d,  $J = 2.7$  Hz), 144.4, 136.1 (d,  $J = 5.1$  Hz), 131.3 (d,  $J = 9.0$  Hz), 127.6 (d,  $J = 9.9$  Hz), 122.9, 119.9 (d,  $J = 25.5$  Hz), 110.7 (d,  $J = 21.6$  Hz), 70.4, 65.4, 41.2, 30.7, 19.1, 13.7; HRMS (ESI)  $m/z$  calcd for  $\text{C}_{16}\text{H}_{19}\text{FNO}_3$   $[\text{M}+\text{H}]^+$  292.1343, found 292.1328.

**butyl 3-(6-chloroquinolin-2-yl)-2-hydroxypropanoate (Table 2, entry 3u)** Brownish

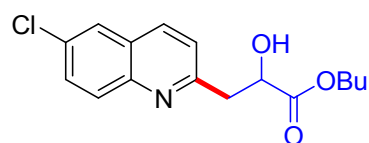

resin (73%);  $^1\text{H}$  NMR (600 MHz,  $\text{CDCl}_3$ )  $\delta$  7.99 (d,  $J = 8.4$  Hz, 1H), 7.92 (d,  $J = 9.0$  Hz, 1H), 7.75 (d,  $J = 2.4$  Hz, 1H), 7.59 - 7.61 (m, 1H), 7.31 (d,  $J = 8.4$  Hz, 1H), 4.73 - 4.75 (m, 1H), 4.14 (td,  $J = 6.6, 1.2$  Hz, 2H), 3.46 - 3.49 (m, 1H), 3.36 - 3.40 (m, 1H), 1.53 - 1.58 (m, 2H), 1.24 - 1.30 (m, 2H), 0.82 - 0.84 (m, 3H);  $^{13}\text{C}$  NMR (150 MHz,  $\text{CDCl}_3$ )  $\delta$  173.9, 159.1, 145.7, 135.8, 132.1,

130.7, 130.5, 127.6, 126.3, 123.1, 70.4, 65.4, 41.3, 30.7, 19.1, 13.7; HRMS (ESI)  $m/z$  calcd for  $C_{16}H_{19}ClNO_3$   $[M+H]^+$  308.1048, found 308.1031.

**butyl 3-(6-bromoquinolin-2-yl)-2-hydroxypropanoate (Table 2, entry 3v)** Brown

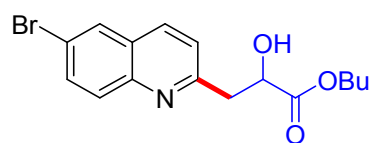

resin (73%);  $^1H$  NMR (300 MHz,  $CDCl_3$ )  $\delta$  7.99 (d,  $J = 8.4$  Hz, 1H), 7.93 (d,  $J = 1.8$  Hz, 1H), 7.85 (d,  $J = 9.0$  Hz, 1H), 7.73 (dd,  $J = 9.0, 2.1$  Hz, 1H), 7.31 (d,  $J = 8.4$  Hz, 1H), 4.72 – 4.76 (m, 1H), 4.14 (t,  $J = 6.6$  Hz, 2H), 3.44 – 3.50 (m, 1H), 3.37 (dd,  $J = 15.6, 6.6$  Hz, 1H), 1.51 – 1.60 (m, 2H), 1.23 – 1.33 (m, 2H), 0.81 – 0.85 (m, 3H);  $^{13}C$  NMR (75 MHz,  $CDCl_3$ )  $\delta$  173.9, 159.3, 146.0, 135.7, 133.2, 130.7, 129.7, 128.2, 123.1, 120.1, 70.4, 65.4, 41.5, 30.7, 19.1, 13.7; HRMS (ESI)  $m/z$  calculated for  $C_{16}H_{19}BrNO_3$   $[M+H]^+$  352.0543, found 352.0538.

**methyl 2-(2-(butoxycarbonyl)-2-hydroxyethyl)quinoline-6-carboxylate (Table 2,**

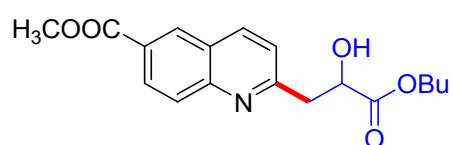

**entry 3w)** Greenish yellow resin (43%);  $^1H$  NMR (600 MHz,  $CDCl_3$ )  $\delta$  8.54 (s, 1H), 8.26 (d,  $J = 9.0$  Hz, 1H), 8.18 (d,  $J = 8.4$  Hz, 1H), 8.02 (d,  $J = 9.0$  Hz, 1H), 7.37 (d,  $J = 8.4$  Hz, 1H), 4.76 – 4.77 (m, 1H), 4.15 (t,  $J = 6.6$  Hz, 2H), 3.98 (s, 3H), 3.50 – 3.53 (m, 1H), 3.42 (dd,  $J = 15.6, 6.6$  Hz, 1H), 1.54 – 1.58 (m, 2H), 1.24 – 1.30 (m, 2H), 0.81 – 0.84 (m, 3H);  $^{13}C$  NMR (150 MHz,  $CDCl_3$ )  $\delta$  173.9, 166.7, 161.3, 149.2, 138.0, 130.8, 129.4, 129.2, 128.0, 126.2, 123.0, 70.3, 65.5, 52.5, 41.6, 30.7, 19.1, 13.7; HRMS (ESI)  $m/z$  calculated for  $C_{18}H_{22}NO_5$   $[M+H]^+$  332.1492, found 332.1481.

**di-tert-butyl 2-(2-(2-(butoxycarbonyl)-2-hydroxyethyl)quinolin-6-yl)malonate**

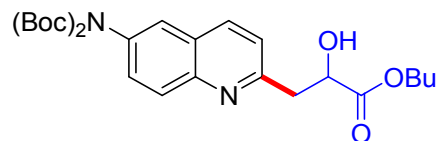

**(Table 2, entry 3x)** Yellow resin (57%);  $^1H$  NMR (600 MHz,  $CDCl_3$ )  $\delta$  8.07 (d,  $J = 8.4$  Hz, 1H), 7.97 (d,  $J = 9.0$  Hz, 1H), 7.56 (d,  $J = 2.4$  Hz, 1H), 7.46 (dd,  $J = 9.0, 2.4$  Hz, 1H), 7.31 (d,  $J = 8.4$  Hz, 1H), 4.75 – 4.77 (m, 1H), 4.14 – 4.16 (m, 2H), 3.49 (dd,  $J = 15.6, 4.2$  Hz, 1H), 3.38 – 3.42 (m, 1H), 1.56 – 1.60 (m, 2H), 1.40 (s, 16H), 1.26 – 1.31 (m, 2H), 0.83 – 0.86 (m, 3H);  $^{13}C$  NMR (150 MHz,  $CDCl_3$ )  $\delta$  173.9, 159.3, 151.8, 146.2, 137.3, 136.9, 130.4, 129.4, 126.9, 126.0, 122.5, 83.2, 70.4, 65.4, 41.2, 30.7, 28.0, 19.1, 13.7; HRMS (ESI)  $m/z$  calcd for  $C_{26}H_{37}N_2O_7$   $[M+H]^+$  489.2595, found 489.2584.

**butyl 2-hydroxy-3-(phenanthridin-6-yl)propanoate (Table 2, entry 3z)** Orange solid

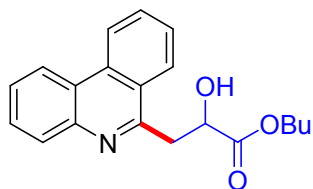

(71%) mp 90 °C;  $^1\text{H}$  NMR (300 MHz,  $\text{CDCl}_3$ )  $\delta$  8.56 (d,  $J = 8.1$  Hz, 1H), 8.47 (d,  $J = 7.8$  Hz, 1H), 8.14 (d,  $J = 8.1$  Hz, 1H), 8.02 (d,  $J = 8.1$  Hz, 1H), 7.81 (t,  $J = 7.5$  Hz, 1H), 7.58 – 7.69 (m, 3H), 4.92 – 4.95 (m, 1H), 4.15 (t,  $J = 6.6$  Hz, 2H), 3.83 – 3.85 (m, 2H), 1.49 – 1.57 (m, 2H), 1.17 – 1.30 (m, 2H), 0.75 – 0.80 (m, 3H);  $^{13}\text{C}$  NMR (75 MHz,  $\text{CDCl}_3$ )  $\delta$  173.9, 158.5, 142.6, 132.9, 130.9, 129.4, 128.8, 127.6, 126.9, 125.7, 125.5, 123.7, 122.5, 122.0, 69.9, 65.1, 37.2, 30.7, 19.1, 13.6; HRMS (ESI)  $m/z$  calcd for  $\text{C}_{20}\text{H}_{22}\text{NO}_3$   $[\text{M}+\text{H}]^+$  324.1594, found 324.1579.

**butyl 3-(benzo[*f*]quinolin-3-yl)-2-hydroxypropanoate (Table 2, entry 3za)** Yellow

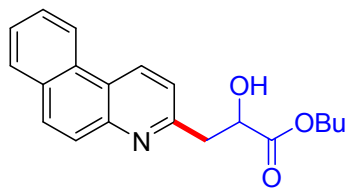

solid (46%); mp 107 °C;  $^1\text{H}$  NMR (600 MHz,  $\text{CDCl}_3$ )  $\delta$  8.88 (d,  $J = 8.4$  Hz, 1H), 8.58 (d,  $J = 8.4$  Hz, 1H), 7.9 (d,  $J = 9.0$  Hz, 1H), 7.89 – 7.98 (m, 2H), 7.68 – 7.70 (m, 1H), 7.64 (t,  $J = 7.2$  Hz, 1H), 7.46 (d,  $J = 8.4$  Hz, 1H), 4.78 – 4.80 (m, 1H), 4.15 (t,  $J = 6.6$  Hz, 2H), 3.52 – 3.55 (m, 1H), 3.42 – 3.46 (m, 1H), 1.54 – 1.60 (m, 2H), 1.26 – 1.31 (m, 2H), 0.81 – 0.84 (m, 3H);  $^{13}\text{C}$  NMR (150 MHz,  $\text{CDCl}_3$ )  $\delta$  174.0, 158.2, 147.3, 131.7, 131.6, 131.3, 129.6, 128.9, 127.7, 127.3, 124.1, 122.6, 122.1, 70.7, 65.4, 40.9, 30.7, 19.1, 13.7; HRMS (ESI)  $m/z$  calcd for  $\text{C}_{20}\text{H}_{22}\text{NO}_3$   $[\text{M}+\text{H}]^+$  324.1594, found 324.1585.

**3,4-dihydro-2,5,7,8-tetramethyl-2-(4,8,12-trimethyltridecyl)-2H-chromen-6-yl 2-**

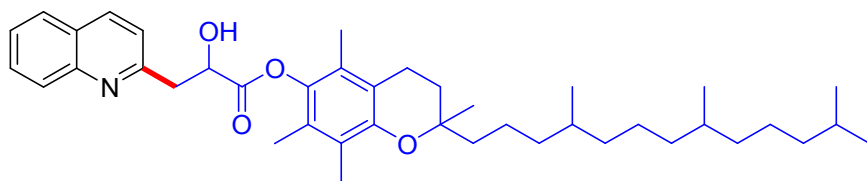

**hydroxy-3-(quinolin-2-yl)propanoate**

**(Table 2, entry 3b)**

Greenish yellow resin (49%);  $^1\text{H}$  NMR (600 MHz,  $\text{CDCl}_3$ )  $\delta$  8.16 (d,  $J = 8.4$  Hz, 1H), 8.06 (d,  $J = 8.4$  Hz, 1H), 7.82 (d,  $J = 8.1$  Hz, 1H), 7.71 – 7.74 (m, 1H), 7.53 – 7.56 (m, 1H), 7.39 (d,  $J = 8.4$  Hz, 1H), 5.09 (dd,  $J = 6.6, 3.6$  Hz, 1H), 3.73 – 3.76 (m, 1H), 3.63 – 3.67 (m, 1H), 2.53 (t,  $J = 6.6$  Hz, 2H), 2.04 (s, 3H), 1.86 (s, 3H), 1.83 (s, 3H), 1.76 – 1.79 (m, 2H), 1.71 – 1.74 (m, 1H), 1.49 – 1.54 (m, 4H), 1.34 – 1.40 (m, 4H), 1.23 – 1.28 (m, 10H), 1.21 (s, 3H), 1.12 – 1.15 (m, 2H), 0.87 (s, 3H), 0.86 (s, 3H), 0.85 (d,  $J = 3.0$  Hz, 3H), 0.84 (d,  $J = 3.0$  Hz, 3H);  $^{13}\text{C}$  NMR (150 MHz,  $\text{CDCl}_3$ )  $\delta$  172.4, 159.1, 149.6, 140.5, 140.1, 130.2, 128.7, 128.7, 127.7, 127.1, 126.7, 126.7,

125.0, 123.2, 122.2, 117.5, 75.2, 70.7, 40.5, 39.5, 37.6, 37.6, 37.5, 37.5, 37.4, 32.9, 32.9, 32.8, 28.1, 25.0, 24.9, 24.6, 22.9, 22.8, 21.2, 21.2, 20.7, 19.8, 12.9, 12.1, 11.9; HRMS (ESI)  $m/z$  calcd for  $C_{41}H_{60}NO_4 [M+H]^+$  630.4517, found 630.4501.

#### 4. Mechanistic study

##### *<sup>18</sup>O isotopic labeling experiment (Scheme 3b)*

To a screw capped vial with a spin vane triangular shaped stir bar, quinoline *N*-oxide (0.1 mmol), ethylacrylate (0.4 mmol) and <sup>18</sup>O labeled water (5 equiv.) were added. The reaction was stirred at 100°C for 15h, filtered and washed with EtOAc. 65% product was observed in NMR and no <sup>18</sup>O incorporation in the final product was observed based on HRMS.

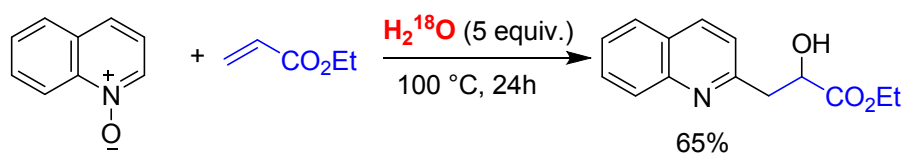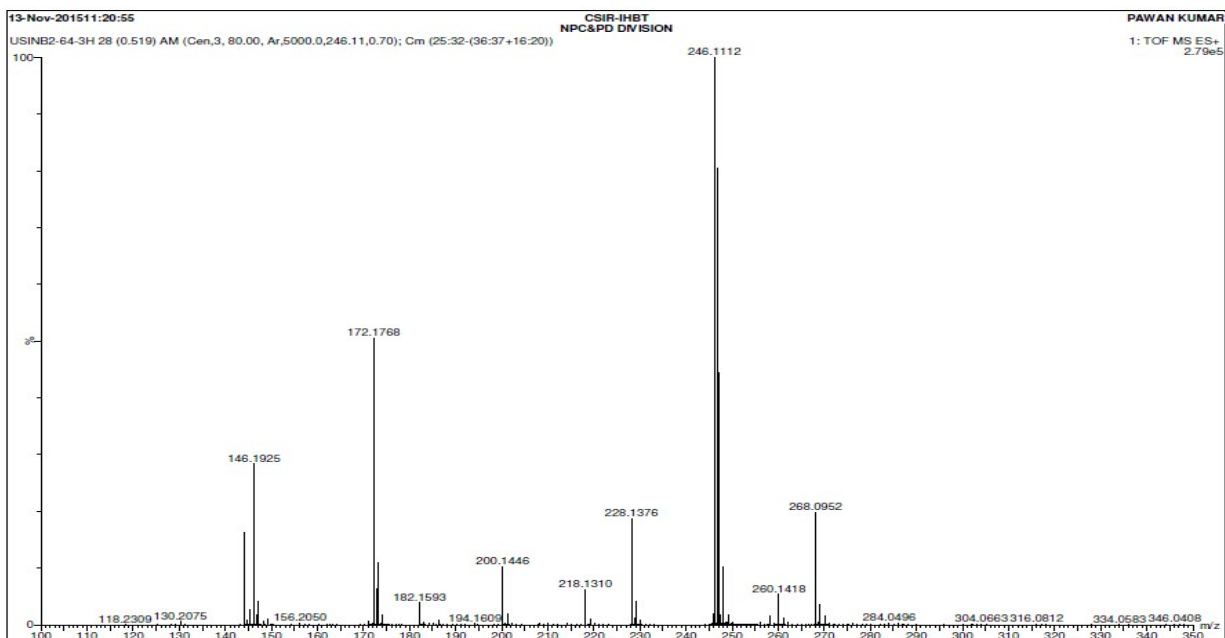

## Competition Experiments Between Electronically Differentiated quinoline *N*-oxide (Scheme 4)

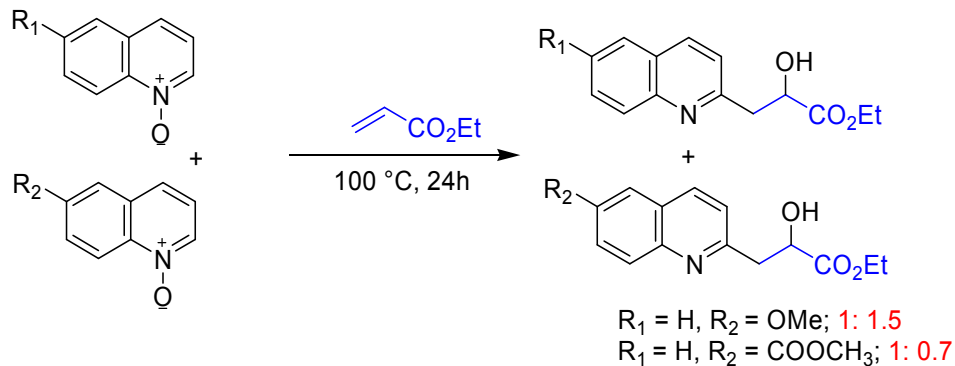

To a screw capped vial with a spin vane triangular shaped stir bar, quinoline *N*-oxide (**A**) (0.05 mmol), 6-OMe (**B**) / 6-COOCH<sub>3</sub>(**C**) quinoline *N*-Oxide (0.05 mmol), butylacrylate (0.4 mmol) were added. The reaction was stirred at 100°C for 15h, filtered and washed with EtOAc.

### <sup>1</sup>H NMR (A+B)

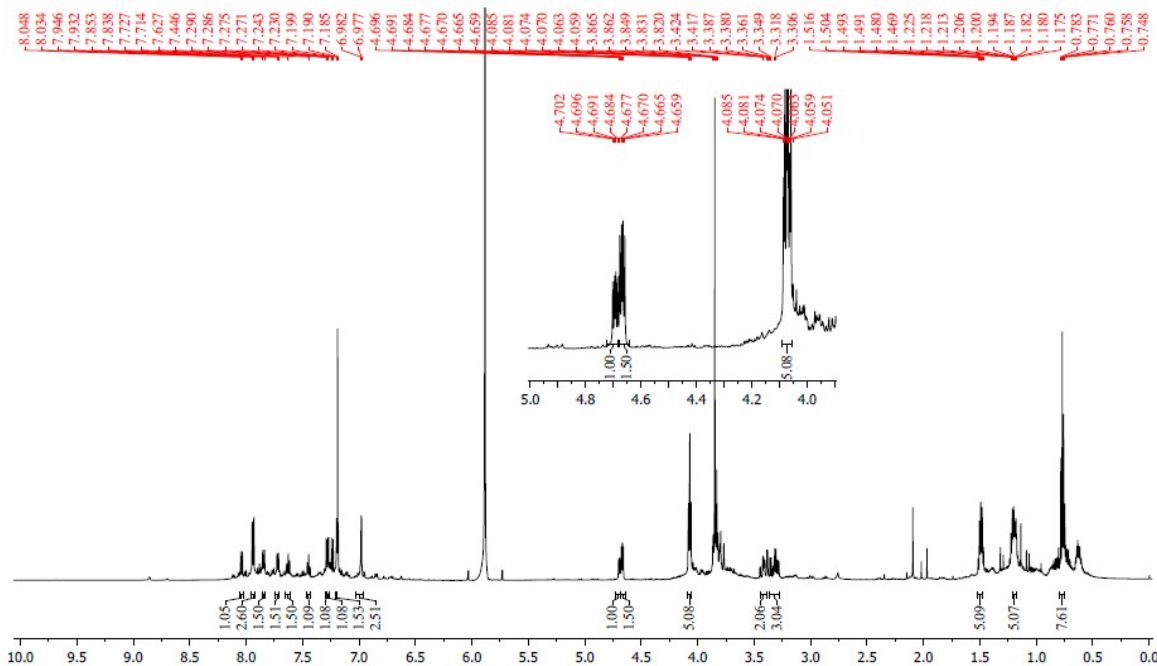

## <sup>1</sup>H NMR (A+C)

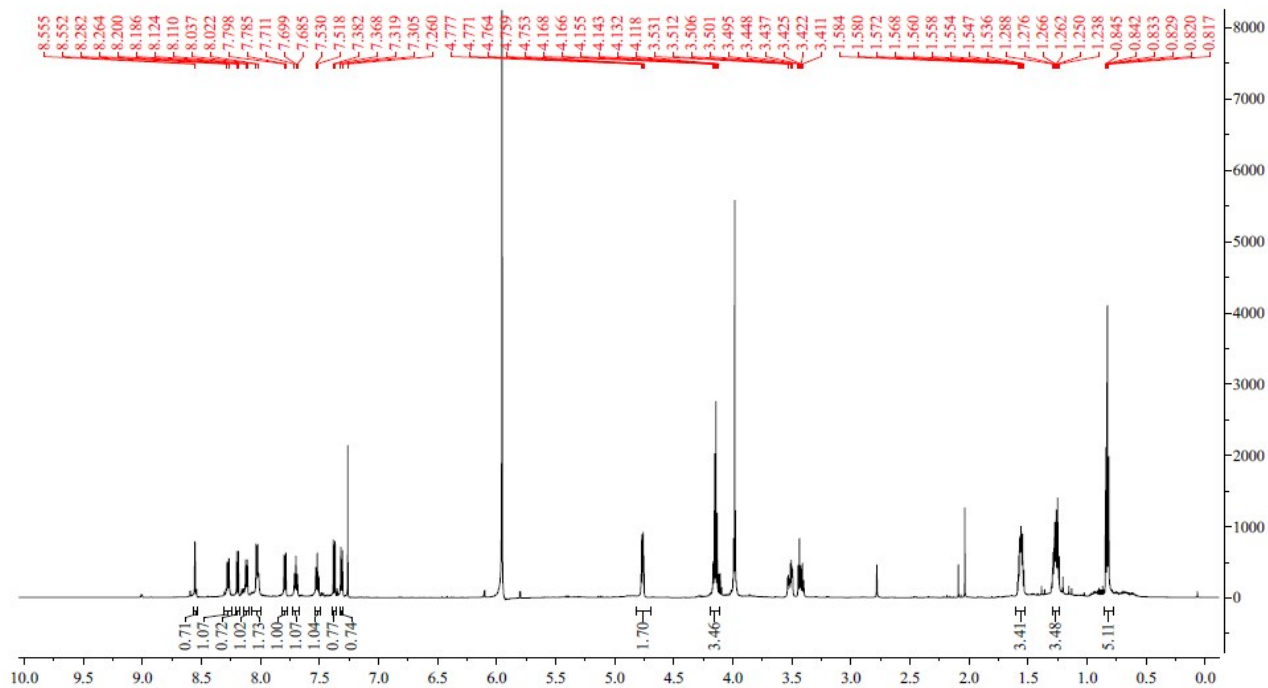

## KIE study (Scheme 5)

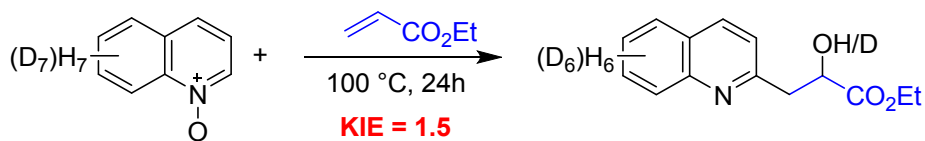

To a screw capped vial with a spin vane triangular shaped stir bar, quinoline *N*-oxide (0.05 mmol), quinoline-*D*<sub>7</sub> *N*-oxide (0.05 mmol), ethyl acrylate (0.4 mmol) were added. The reaction was stirred at 100°C for 15h, filtered and washed with EtOAc. Solvent was removed under reduced pressure and residue was purified by flash chromatography on silica gel (hexane: EtOAc) to give the mixture of desired product P+[*D*6]-P. the ratio of P/[*D*6]-P was obtained by <sup>1</sup>H-NMR to give KIE value of **1.5**.

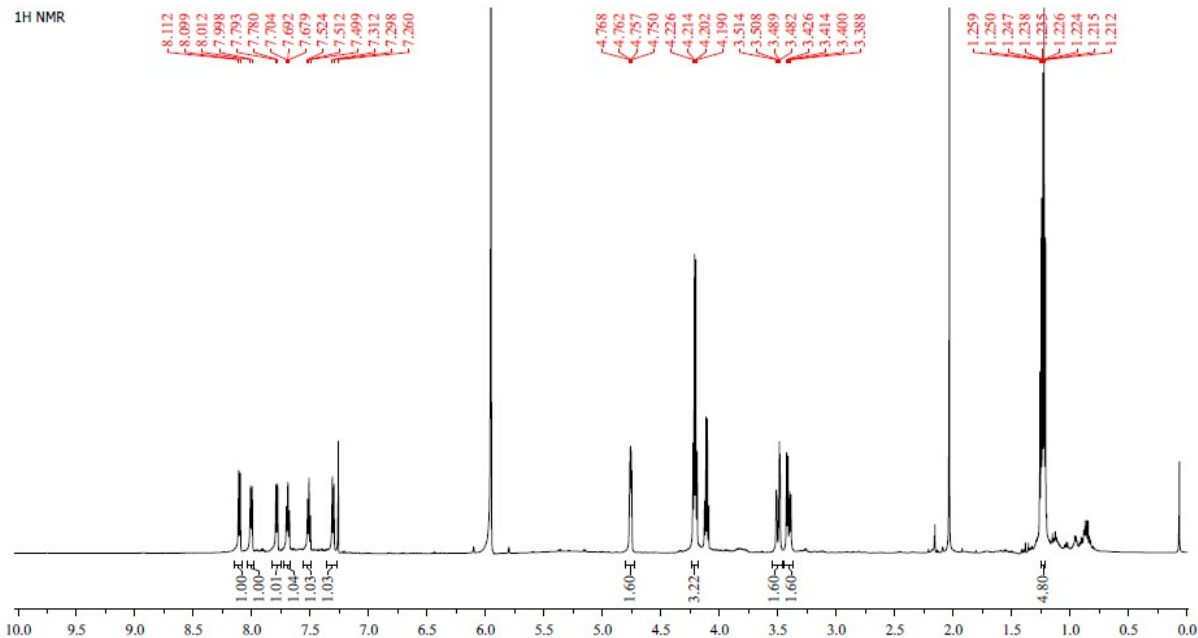

## 5. General Procedure for Conversion of **3a** to **4a**<sup>[3]</sup>

To an oven-dried screw cap reaction vial charged with a spin vane magnetic stir-bar, ethyl 2-hydroxy-3-(quinolin-2-yl)propanoate (**3a**) (0.1 mmol) was added. The reaction vial was closed with screw cap and kept for vigorous stirring on a preheated oil bath at 100°C for 24h. After completion, reaction mixture was allowed to cool down to room temperature and extracted with ethyl acetate. Ethyl acetate layer was dried over anhydrous Na<sub>2</sub>SO<sub>4</sub> and concentrated under reduced pressure. Residue was purified by flash chromatography using silica gel (230-400 mesh size) and *n*-hexane: EtOAc as eluent to give (*E*)-ethyl 3-(quinolin-2-yl)acrylate (**4a**) in 46% yield.<sup>[3]</sup>

## References

- [1] J. Jeong, P. Patel, H. Hwang, S. Chang, *Org. Lett.* **2014**, *16*, 4598–4601.
- [2] (a) J.J. Jin, H.Y. Niu, G.R. Qu, H.M. Guo, J.S. Fossey, *RSC Advances*, **2012**, *2*, 5968–5971;  
 (b) K. jiang, D. pi, H. Zhou, S. Liu, K. Zou, *Tetrahedron*, **2014**, *70*, 3056-3060; (c) D. Pi, K. Jiang, H. Zhou, Y. Sui, Y. Uozumi, K. Zou, *RSC Adv.*, **2014**, DOI: 10.1039/C4RA10939B .
- [3] J. Wu, X. Cui, L. Chen, G. Jiang, Y. Wu, *J. Am. Chem. Soc.* **2008**, *131*, 13888-13889.
